# Supplementary material for: Highly enantioselective iron(ii)-catalyzed opening reaction of aromatic meso-epoxides with indoles
Source: Royal Society of Chemistry journal article supplement (doi:10.1039/c3ob41782d), 2013-01-01

## Highly Enantioselective Iron(II)-catalyzed Opening Reaction of Aromatic *meso*-Epoxides with Indoles

Baptiste Plancq, Mathieu Lafantaisie, Simon Companys, Cendrella Maroun,  
Thierry Ollevier\*

*Département de chimie, Université Laval, 1045 avenue de la Médecine,  
Québec (Québec) G1V 0A6, Canada*

### Supporting Information

| Table of Contents                                                                 | Pages |
|-----------------------------------------------------------------------------------|-------|
| Experimental                                                                      | 1     |
| General Procedure for the Epoxide Opening Reaction                                | 2     |
| Characterization Data of the 2-(indol-3-yl)ethanol Derivatives                    | 2     |
| Procedure for the Kinetic Resolution of <i>trans</i> -Stilbene Oxide with Indole  | 8     |
| Crystallization of [FeBr <sub>2</sub> · <b>1</b> ](H <sub>2</sub> O)·2THF Complex | 9     |
| References                                                                        | 9     |
| <sup>1</sup> H, <sup>13</sup> C-NMR Spectra and HPLC Chromatograms                | 10    |

### Experimental

#### General

All reactions were performed in flame-dried 12x75 mm culture tubes under an atmosphere of nitrogen or argon. Dichloromethane was distilled from CaH<sub>2</sub>. Indoles were used as received and *meso*-epoxides were prepared by known procedures.<sup>1</sup> Bolm's ligand **1** was synthesized according to known procedures.<sup>2</sup> Iron(II) perchlorate was purchased from Alfa Aesar<sup>®</sup> (reagent grade purity) and iron(II) triflate was synthesized from iron metal (Alfa Aesar<sup>®</sup>, 99.9+%, (metals basis)) and triflic acid.<sup>3</sup> <sup>1</sup>H and <sup>13</sup>C NMR spectra were recorded on a Varian Inova 400 MHz spectrometer in CDCl<sub>3</sub>. Chemical shifts for <sup>1</sup>H NMR spectra (400 MHz) are recorded in parts per million from tetramethylsilane (TMS) with the solvent resonance as the internal standard (chloroform, δ = 7.27 ppm). Data are reported as follows: chemical shift (in ppm), multiplicity (s = singlet, d = doublet, t = triplet, q = quartet, m = multiplet, br = broad), coupling constant (in Hz), and integration. Chemical shifts for <sup>13</sup>C NMR spectra (100 MHz) are recorded in parts per million from tetramethylsilane using the solvent resonance as the internal standard (chloroform, δ = 77.23 ppm). All <sup>13</sup>C NMR spectra were obtained with complete proton decoupling. IR spectra were recorded on a NICOLET 380 FT-IR spectrometer with ZnSe ATR accessory and are reported in reciprocal centimeter (cm<sup>-1</sup>). High-resolution mass spectra (HRMS) were recorded on an Agilent 6210 ESI TOF (time of flight) mass spectrometer. Melting points (m.p.) are uncorrected and were recorded on a MEL-

TEMP<sup>®</sup> melting point apparatus. Flash column chromatography<sup>4</sup> was performed on silica gel (230–400 mesh) and analytical thin-layer chromatography was carried out using 250  $\mu\text{m}$  commercial silica gel plates. Visualization of the developed chromatogram was performed by UV absorbance and/or ceric ammonium molybdate solution (CAM). Thermogravimetric analysis was performed on a Mettler Toledo<sup>®</sup> apparatus. Chiral High Performance Liquid Chromatography were performed on an Agilent 1100 Series LC system and data are reported as follows: column type, eluent, flow rate, wavelength, retention time  $t_{\text{R}}$ . To confirm the retention times of both enantiomers, all racemic 2-(indol-3-yl)ethanol derivatives were prepared and injected on chiral HPLC.

*Caution: Perchlorate salts can be explosive and should be handled with care. Conversion to lower hydrates by unintentional dehydration may cause explosion. Use due caution in handling, as for all perchlorates.*<sup>5</sup>

### **General Procedure for the *meso*-Epoxide Opening Reaction with Various Indoles**

A mixture of  $\text{Fe}(\text{ClO}_4)_2 \cdot 6\text{H}_2\text{O}$  (18.1 mg, 0.05 mmol), Bolm's ligand **1** (19.7 mg, 0.06 mmol) and 4Å MS (50 mg) in distilled  $\text{CH}_2\text{Cl}_2$  (0.5 mL) was stirred at room temperature for 0.5 h. The indole derivative (0.6 mmol) and the epoxide (0.5 mmol) were then subsequently added to the mixture. The reaction mixture was stirred at room temperature until the starting materials disappeared (monitored by TLC), and was then directly poured onto silica-gel column and eluted with  $\text{CH}_2\text{Cl}_2$  to give the desired product. The enantiomeric excess of the product was determined by chiral HPLC analysis.

### **Characterization Data of the 2-(indol-3-yl)ethanol derivatives**

#### **(1*R*,2*R*)-2-(3-Indolyl)-1,2-diphenylethanol (Table 2, entry 1)<sup>6,7</sup>**

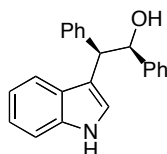

According to the general procedure with 98.1 mg *cis*-stilbene oxide and 70.3 mg indole, the product was isolated as a white solid (m.p. = 158–159 °C). Reaction time = 18 h. <sup>1</sup>H NMR ( $\text{CDCl}_3$ , 400 MHz):  $\delta$  = 2.49 (d,  $J$  = 2.8 Hz, 1H), 4.60 (d,  $J$  = 7.9 Hz, 1H), 5.35 (dd,  $J$  = 2.8, 7.9 Hz, 1H), 7.02–7.26 (m, 12H), 7.34–7.37 (m, 2H), 7.45 (dd,  $J$  = 1.1, 8.0 Hz, 1H), 8.18 (brs, 1H). <sup>13</sup>C NMR ( $\text{CDCl}_3$ , 100 MHz):  $\delta$  = 52.3, 77.9, 111.4, 115.5, 119.6, 119.9, 122.6, 122.7, 126.6, 127.0, 127.6, 127.8, 128.2, 128.4, 128.9, 136.6, 142.0, 142.6. IR (neat): 3535, 3306, 3058, 3025, 2880, 1598, 1455, 1422, 1338, 1224, 1032, 1018, 987, 740. HRMS (ESI-TOF) calcd for  $\text{C}_{22}\text{H}_{20}\text{NO}^+$  ( $[\text{M}+\text{H}]^+$ ): 314.1539, found: 314.1540.  $[\alpha]_{\text{D}}^{24}$   $-77.5$  ( $c$  = 1.0,  $\text{CHCl}_3$ , > 99% ee). HPLC (Daicel Chiralcel<sup>®</sup> OD-H, hexane/*i*-PrOH = 85/15, flow rate = 0.8 mL/min,  $\lambda$  = 220 nm)  $t_{\text{R}}$  = 36.9 min (major),  $t_{\text{R}}$  = 44.2 min (minor).

**(1*R*,2*R*)-2-(4-Chloro-3-indolyl)-1,2-diphenylethanol (Table 2, entry 2)**

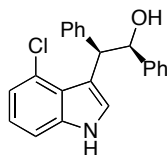

According to the general procedure with 98.1 mg *cis*-stilbene oxide and 72.2  $\mu$ L 4-chloroindole, the product was isolated as a white solid (m.p. = 96–101 °C). Reaction time = 45 h.  $^1\text{H}$  NMR ( $\text{CDCl}_3$ , 400 MHz):  $\delta$  = 2.55 (brs, 1H), 5.22 (d,  $J$  = 8.0 Hz, 1H), 5.44 (d,  $J$  = 8.0 Hz, 1H), 6.98–7.29 (m, 13H), 7.48 (d,  $J$  = 2.2 Hz, 1H), 8.32 (s, 1H).  $^{13}\text{C}$  NMR ( $\text{CDCl}_3$ , 100 MHz):  $\delta$  = 51.0, 78.7, 110.2, 115.8, 121.3, 122.9, 123.7, 124.5, 126.5, 126.6, 127.0, 127.5, 128.2, 128.3, 129.3, 137.8, 142.2, 142.3. IR (neat): 3515, 3354, 3242, 3029, 2916, 1618, 1489, 1453, 1423, 1338, 1266, 1182, 1073, 1033, 979, 936, 867, 817, 777  $\text{cm}^{-1}$ . HRMS (ESI-TOF) calcd for  $\text{C}_{22}\text{H}_{19}\text{ClNO}^+$  ( $[\text{M}+\text{H}]^+$ ): 348.1150, found: 348.1149.  $[\alpha]_{\text{D}}^{24}$  –137.3 ( $c$  = 0.7, MeOH, 97% ee). HPLC (Daicel Chiralcel<sup>®</sup> OD-H, hexane/*i*-PrOH = 75/25, flow rate = 0.8 mL/min,  $\lambda$  = 220 nm)  $t_{\text{R}}$  = 9.7 min (major),  $t_{\text{R}}$  = 15.9 min (minor).

**(1*R*,2*R*)-2-(5-Methyl-3-indolyl)-1,2-diphenylethanol (Table 2, entry 3)<sup>7</sup>**

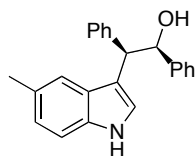

According to the general procedure with 98.1 mg *cis*-stilbene oxide and 78.7 mg 5-methylindole, the product was isolated as a white solid (m.p. = 185–186 °C). Reaction time = 19 h.  $^1\text{H}$  NMR ( $\text{CDCl}_3$ , 400 MHz):  $\delta$  = 2.38 (s, 3H), 2.53 (d,  $J$  = 2.7 Hz, 1H), 4.57 (d,  $J$  = 8.0 Hz, 1H), 5.33 (dd,  $J$  = 2.7, 8.0 Hz, 1H), 7.00 (dd,  $J$  = 1.4, 8.2 Hz, 1H), 7.07–7.25 (m, 12H), 7.31 (d,  $J$  = 2.5 Hz, 1H), 8.08 (brs, 1H).  $^{13}\text{C}$  NMR ( $\text{CDCl}_3$ , 100 MHz):  $\delta$  = 21.8, 52.4, 111.0, 115.0, 119.2, 122.8, 124.3, 126.5, 127.1, 127.6, 128.8, 128.2, 128.4, 129.2, 134.9, 142.0, 142.6. IR (neat): 3523, 3280, 3024, 2881, 2852, 1600, 1485, 1428, 1309, 1226, 1111, 1022, 922, 796  $\text{cm}^{-1}$ . HRMS (ESI-TOF) calcd for  $\text{C}_{23}\text{H}_{22}\text{NO}^+$  ( $[\text{M}+\text{H}]^+$ ): 328.1696, found: 328.1699.  $[\alpha]_{\text{D}}^{24}$  –39.8 ( $c$  = 1.0,  $\text{CHCl}_3$ , > 99% ee). HPLC (Daicel Chiralpak<sup>®</sup> AD-H, hexane/*i*-PrOH = 70/30, flow rate = 0.8 mL/min,  $\lambda$  = 220 nm)  $t_{\text{R}}$  = 18.4 min (minor),  $t_{\text{R}}$  = 23.2 min (major).

**(1*R*,2*R*)-2-(5-Methoxy-3-indolyl)-1,2-diphenylethanol (Table 2, entry 4)<sup>6,7</sup>**

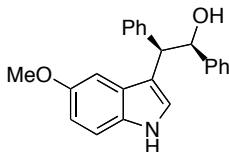

According to the general procedure with 98.1 mg *cis*-stilbene oxide and 88.3 mg 5-methoxyindole, the product was isolated as a white solid (m.p. = 173–174 °C). Reaction time = 18 h.  $^1\text{H}$  NMR ( $\text{CDCl}_3$ , 400 MHz):  $\delta$  = 2.52 (d,  $J$  = 3.3 Hz, 1H), 3.70 (s, 3H), 4.56

(d,  $J = 7.5$  Hz, 1H), 5.35 (dd,  $J = 3.3, 7.5$  Hz, 1H), 6.78 (d,  $J = 2.3$ , 1H), 6.83 (dd,  $J = 2.3, 7.8$  Hz, 1H), 7.09-7.25 (m, 11H), 7.29 (d,  $J = 2.3$ Hz, 1H), 8.05 (brs, 1H).  $^{13}\text{C}$  NMR ( $\text{CDCl}_3$ , 100 MHz):  $\delta = 52.3, 56.5, 77.6, 101.5, 112.0, 112.8, 115.1, 123.5, 126.6, 126.9, 127.6, 128.2, 128.2, 128.4, 128.8, 131.7, 142.1, 142.8, 154.2$ . IR (neat): 3516, 3311, 3130, 3062, 3025, 2878, 2854, 1623, 1583, 1484, 1436, 1264, 1211, 1164, 1055, 1033, 1022, 925, 809, 691  $\text{cm}^{-1}$ . HRMS (ESI-TOF) calcd for  $\text{C}_{23}\text{H}_{22}\text{NO}_2^+$  ( $[\text{M}+\text{H}]^+$ ): 344.1645, found: 344.1648.  $[\alpha]_{\text{D}}^{24} -22.8$  ( $c = 0.9$ ,  $\text{CHCl}_3$ ,  $> 99\%$  ee). HPLC (Daicel Chiralpak<sup>®</sup> AD-H, hexane/*i*-PrOH = 70/30, flow rate = 0.8 mL/min,  $\lambda = 220$  nm)  $t_{\text{R}} = 23.3$  min (minor),  $t_{\text{R}} = 29.7$  min (major).

### (1*R*,2*R*)-2-(5-Bromo-3-indolyl)-1,2-diphenylethanol (Table 2, entry 5)<sup>7</sup>

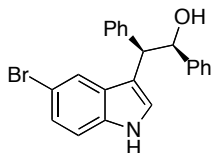

According to the general procedure with 98.1 mg *cis*-stilbene oxide and 117.6 mg 5-bromoindole, the product was isolated as a white solid (m.p. = 129–131 °C). Reaction time = 19 h.  $^1\text{H}$  NMR ( $\text{CDCl}_3$ , 400 MHz):  $\delta = 2.37$  (d,  $J = 3.2$  Hz, 1H), 4.54 (d,  $J = 7.2$  Hz, 1H), 5.32 (dd,  $J = 3.2, 7.2$  Hz, 1H), 7.10-7.25 (m, 12H), 7.36 (d,  $J = 2.6$  Hz, 1H), 7.49 (m, 1H), 8.16 (brs, 1H).  $^{13}\text{C}$  NMR ( $\text{CDCl}_3$ , 100 MHz):  $\delta = 51.8, 112.8, 113.2, 115.2, 122.2, 124.0, 125.4, 126.8, 126.9, 127.8, 128.3, 128.5, 128.8, 129.6, 135.0, 141.6, 142.5$ . IR (neat): 3514, 3329, 3130, 3025, 2872, 1459, 1419, 1268, 1224, 1101, 1044, 1032, 887, 794, 695  $\text{cm}^{-1}$ . HRMS (ESI-TOF) calcd for  $\text{C}_{22}\text{H}_{19}\text{BrNO}^+$  ( $[\text{M}+\text{H}]^+$ ): 392.0645, found: 392.0648.  $[\alpha]_{\text{D}}^{24} -17.5$  ( $c = 1.0$ ,  $\text{CHCl}_3$ ,  $> 99\%$  ee). HPLC (Daicel Chiralcel<sup>®</sup> OD-H, hexane/*i*-PrOH = 70/30, flow rate = 0.8 mL/min,  $\lambda = 220$  nm)  $t_{\text{R}} = 14.7$  min (minor),  $t_{\text{R}} = 22.6$  min (major).

### (1*R*,2*R*)-2-(5-Nitro-3-indolyl)-1,2-diphenylethanol (Table 2, entry 6)

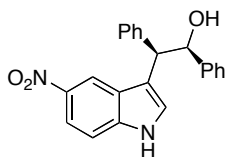

According to the general procedure with 98.1 mg *cis*-stilbene oxide and 97.3 mg 5-nitroindole, the product was isolated as a yellow solid (m.p. = 68–73 °C). Reaction time = 45 h.  $^1\text{H}$  NMR ( $\text{CDCl}_3$ , 400 MHz):  $\delta = 3.25$  (dd,  $J = 7.1, 8.9$  Hz, 1H), 4.08 (dd,  $J = 7.1, 7.1$  Hz, 1H), 5.00 (d,  $J = 8.9$  Hz, 1H), 5.68 (s, 1H), 6.13 (dd,  $J = 1.4, 7.1$  Hz, 1H), 6.62 (d,  $J = 8.7$  Hz, 1H), 7.10-7.26 (m, 7H), 7.10-7.42 (m, 3H), 7.81-7.83 (m, 1H), 8.09 (dd,  $J = 2.3, 8.7$  Hz, 1H).  $^{13}\text{C}$  NMR ( $\text{CDCl}_3$ , 100 MHz):  $\delta = 55.3, 61.7, 86.7, 94.4, 107.4, 120.9, 126.3, 126.8, 127.8, 128.2, 128.3, 128.6, 129.4, 130.7, 139.0, 140.3, 153.8$ . IR (neat): 3364, 3030, 2917, 1612, 1492, 1452, 1314, 1263, 1167, 1127, 1072, 1033, 1010, 937, 908, 844, 751  $\text{cm}^{-1}$ . HRMS (ESI-TOF) calcd for  $\text{C}_{22}\text{H}_{19}\text{N}_2\text{O}_3^+$  ( $[\text{M}+\text{H}]^+$ ): 359.1390, found: 359.1391.  $[\alpha]_{\text{D}}^{24} -168.8$  ( $c = 0.5$ ,  $\text{CHCl}_3$ , 99% ee). HPLC (Daicel Chiralcel<sup>®</sup> OD-

H, hexane/*i*-PrOH = 80/20, flow rate = 0.8 mL/min,  $\lambda$  = 220 nm)  $t_R$  = 27.6 min (minor),  $t_R$  = 33.1 min (major).

**(1*R*,2*R*)-2-(6-Fluoro-3-indolyl)-1,2-diphenylethanol (Table 2, entry 7)**

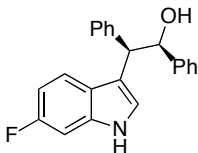

According to the general procedure with 98.1 mg *cis*-stilbene oxide and 81.1 mg 6-fluoroindole, the product was isolated as a white solid (m.p. = 160–162 °C). Reaction time = 20 h.  $^1\text{H}$  NMR ( $\text{CDCl}_3$ , 400 MHz):  $\delta$  = 2.43 (d,  $J$  = 2.9 Hz, 1H), 4.56 (dd,  $J$  = 0.7, 7.7 Hz, 1H), 5.32 (dd,  $J$  = 2.9, 7.7 Hz, 1H), 6.77 (ddd,  $J$  = 2.3, 7.7, 9.3 Hz, 1H), 7.01 (dd,  $J$  = 2.3, 9.3 Hz, 1H), 7.08–7.24 (m, 10H), 7.28 (dd,  $J$  = 5.3, 8.7 Hz, 1H), 7.33 (d,  $J$  = 2.4 Hz, 1H), 8.13 (brs, 1H).  $^{13}\text{C}$  NMR ( $\text{CDCl}_3$  + 1 drop  $\text{DMSO-d}_6$ , 100 MHz):  $\delta$  = 52.1, 77.7, 97.6 (d,  $J$  = 25.5 Hz), 107.9 (d,  $J$  = 24.5 Hz), 115.3, 120.1 (d,  $J$  = 10.0 Hz), 123.3, 124.5, 126.4, 127.0, 127.4, 128.0, 128.2, 128.9, 136.5 (d,  $J$  = 12.3 Hz), 142.2, 143.1, 160.0 (d,  $J$  = 237.0 Hz). IR (neat): 3598, 3424, 3345, 3026, 2869, 1625, 1493, 1452, 1345, 1304, 1241, 1218, 1119, 1033, 1022, 947, 760, 695  $\text{cm}^{-1}$ . HRMS (ESI-TOF) calcd for  $\text{C}_{22}\text{H}_{19}\text{FNO}^+$  ( $[\text{M}+\text{H}]^+$ ): 332.1445, found: 332.1441.  $[\alpha]_{\text{D}}^{24}$   $-70.8$  ( $c$  = 1.1,  $\text{CHCl}_3$ , 98% ee). HPLC (Daicel Chiralcel<sup>®</sup> OD-H, hexane/*i*-PrOH = 80/20, flow rate = 0.8 mL/min,  $\lambda$  = 220 nm)  $t_R$  = 14.5 min (major),  $t_R$  = 19.3 min (minor).

**(1*R*,2*R*)-2-(7-Methoxy-3-indolyl)-1,2-diphenylethanol (Table 2, entry 8)**

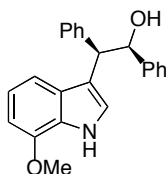

According to the general procedure with 98.1 mg *cis*-stilbene oxide and 78.4  $\mu\text{L}$  7-methoxyindole, the product was isolated as a white solid (m.p. = 125–128 °C). Reaction time = 41 h.  $^1\text{H}$  NMR ( $\text{CDCl}_3$ , 400 MHz):  $\delta$  = 2.51 (d,  $J$  = 2.8 Hz, 1H), 3.94 (s, 3H), 4.57 (d,  $J$  = 8.0 Hz, 1H), 5.35 (dd,  $J$  = 2.8, 8.0 Hz, 1H), 6.62 (d,  $J$  = 8.0 Hz, 1H), 6.96 (t,  $J$  = 8.0 Hz, 1H), 7.06–7.25 (m, 11H), 7.33 (dd,  $J$  = 0.7, 2.9 Hz, 1H), 8.39 (brs, 1H).  $^{13}\text{C}$  NMR ( $\text{CDCl}_3$ , 100 MHz):  $\delta$  = 52.5, 55.6, 77.9, 102.3, 112.4, 115.9, 120.3, 122.3, 126.5, 127.1, 127.2, 127.6, 128.2, 128.3, 128.9, 129.1, 142.0, 142.7, 146.3. IR (neat): 3491, 3266, 3059, 3025, 3001, 2887, 2836, 1625, 1577, 1499, 1451, 1421, 1371, 1260, 1235, 1109, 1052, 1039, 1025, 775, 694  $\text{cm}^{-1}$ . HRMS (ESI-TOF) calcd for  $\text{C}_{23}\text{H}_{22}\text{NO}_2^+$  ( $[\text{M}+\text{H}]^+$ ): 344.1645, found: 344.1649.  $[\alpha]_{\text{D}}^{24}$   $-70.7$  ( $c$  = 1.0,  $\text{CHCl}_3$ , 98% ee). HPLC (Daicel Chiralcel<sup>®</sup> OD-H, hexane/*i*-PrOH = 60/40, flow rate = 0.8 mL/min,  $\lambda$  = 220 nm)  $t_R$  = 26.1 min (major),  $t_R$  = 36.2 min (minor).

**(1*R*,2*R*)-2-(1-Methyl-3-indolyl)-1,2-diphenylethanol (Table 2, entry 9)<sup>6</sup>**

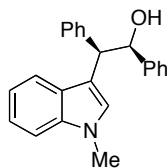

According to the general procedure with 98.1 mg *cis*-stilbene oxide and 74.5  $\mu$ L *N*-methylindole, the product was isolated as a white solid (m.p. = 50–53 °C). Reaction time = 19 h. <sup>1</sup>H NMR (CDCl<sub>3</sub>, 400 MHz):  $\delta$  = 2.52 (d, *J* = 2.7 Hz, 1H), 3.81 (s, 3H), 4.58 (d, *J* = 8.2 Hz, 1H), 5.33 (dd, *J* = 2.7, 8.2 Hz, 1H), 7.02–7.26 (m, 13H), 7.30 (dt, *J* = 1.0, 8.2 Hz, 1H), 7.46 (dt, *J* = 1.0, 7.9 Hz, 1H). <sup>13</sup>C NMR (CDCl<sub>3</sub>, 100 MHz):  $\delta$  = 33.1, 52.5, 77.9, 109.5, 114.0, 119.4, 119.8, 122.2, 126.5, 127.1, 127.4, 127.6, 128.2, 128.3, 128.4, 128.8, 137.4, 142.2, 142.7. IR (neat): 3541, 3408, 3058, 3027, 2883, 1614, 1601, 1584, 1543, 1473, 1423, 1373, 1329, 1235, 1189, 1154, 1041, 1030, 1013, 915, 800 cm<sup>-1</sup>. HRMS (ESI-TOF) calcd for C<sub>23</sub>H<sub>22</sub>NO<sup>+</sup> ([M+H]<sup>+</sup>): 328.1696, found: 328.1696. [ $\alpha$ ]<sub>D</sub><sup>24</sup> – 66.5 (*c* = 1.0, CHCl<sub>3</sub>, 96% ee). HPLC (Daicel Chiralcel<sup>®</sup> OD-H, hexane/*i*-PrOH = 80/20, flow rate = 0.8 mL/min,  $\lambda$  = 254 nm) *t*<sub>R</sub> = 19.7 min (minor), *t*<sub>R</sub> = 34.4 min (major).

**(1*R*,2*R*)-2-(3-Benzo[*g*]indolyl)-1,2-diphenylethanol (Table 2, entry 10)**

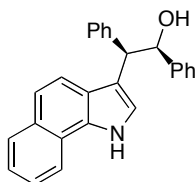

According to the general procedure with 98.1 mg *cis*-stilbene oxide and 100.3 mg benzo[*g*]indole, the product was isolated as a white solid (m.p. = 235–238 °C). Reaction time = 1 h. <sup>1</sup>H NMR (CDCl<sub>3</sub> + 1 drop DMSO-*d*<sub>6</sub>, 400 MHz):  $\delta$  = 2.25 (s, 1H), 4.60 (d, *J* = 8.0 Hz, 1H), 5.30 (dd, *J* = 2.9, 8.0 Hz, 1H), 6.99–7.20 (m, 10H), 7.30–7.46 (m, 5H), 7.80 (d, *J* = 8.1 Hz, 1H), 8.13 (d, *J* = 8.1 Hz, 1H), 10.38 (s, 1H). <sup>13</sup>C NMR (CDCl<sub>3</sub> + 1 drop DMSO-*d*<sub>6</sub>, 100 MHz):  $\delta$  = 52.1, 77.7, 116.7, 119.5, 119.7, 120.7, 121.3, 122.4, 123.5, 123.7, 125.2, 126.1, 127.0, 127.1, 127.9, 128.1, 128.5, 128.9, 130.3, 131.3, 142.7, 143.6. IR (neat): 3535, 3310, 3062, 3028, 2872, 1600, 1524, 1489, 1477, 1391, 1293, 1271, 1217, 1105, 1072, 1038, 1027, 953, 804, 749 cm<sup>-1</sup>. HRMS (ESI-TOF) calcd for C<sub>26</sub>H<sub>22</sub>NO<sup>+</sup> ([M+H]<sup>+</sup>): 364.1696, found: 364.1699. [ $\alpha$ ]<sub>D</sub><sup>24</sup> – 152.4 (*c* = 0.5, MeOH, > 99% ee). HPLC (Daicel Chiralpak<sup>®</sup> AD-H, hexane/*i*-PrOH = 60/40, flow rate = 0.8 mL/min,  $\lambda$  = 220 nm) *t*<sub>R</sub> = 41.9 min (minor), *t*<sub>R</sub> = 53.8 min (major).

**(1*R*,2*R*)-2-(5-Bromo-7-iodo-3-indolyl)-1,2-diphenylethanol (Table 2, entry 11)**

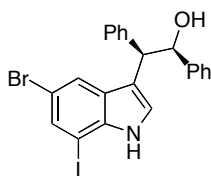

According to the general procedure with 98.1 mg *cis*-stilbene oxide and 193.2 mg 5-bromo-7-iodoindole, the product was isolated as a white solid (m.p. = 151–153 °C). Reaction time = 20 h. <sup>1</sup>H NMR (CDCl<sub>3</sub>, 400 MHz): δ = 2.30 (d, *J* = 3.0 Hz, 1H), 4.51 (d, *J* = 6.9 Hz, 1H), 5.32 (dd, *J* = 3.0, 6.9 Hz, 1H), 7.12–7.25 (m, 10H), 7.41 (dd, *J* = 1.5, 2.5 Hz, 1H), 7.44 (d, *J* = 2.5 Hz, 1H), 7.59 (d, *J* = 1.5 Hz, 1H), 8.21 (s, 1H). <sup>13</sup>C NMR (CDCl<sub>3</sub>, 100 MHz): δ = 51.8, 77.7, 113.1, 116.7, 122.4, 124.6, 126.7, 127.8, 128.3, 128.6, 128.7, 129.0, 132.7, 137.1, 141.4, 142.5. IR (neat): 3547, 3440, 3061, 3027, 1552, 1538, 1489, 1460, 1454, 1413, 1320, 1286, 1189, 1105, 1071, 1037, 985, 873, 866 cm<sup>-1</sup>. HRMS (ESI-TOF) calcd for C<sub>22</sub>H<sub>18</sub>BrINO<sup>+</sup> ([M+H]<sup>+</sup>): 517.9611, found: 517.9615. [α]<sub>D</sub><sup>24</sup> –70.2 (*c* = 1.0, MeOH, > 99% ee). HPLC (Daicel Chiralcel<sup>®</sup> OD-H, hexane/*i*-PrOH = 80/20, flow rate = 0.8 mL/min, λ = 220 nm) t<sub>R</sub> = 16.8 min (major), t<sub>R</sub> = 35.5 min (minor).

**(1*R*,2*R*)-2-(1*H*-Indol-3-yl)-1,2-di(naphthalen-2-yl)ethanol (Scheme 1)<sup>8</sup>**

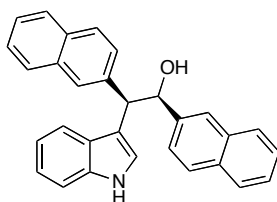

According to the general procedure with 55.0 mg *cis*-2,3-di(naphthalen-2-yl)oxirane and 25.7 mg indole, the product was isolated as a white solid (m.p. = 198–201 °C). Reaction time = 24 h. <sup>1</sup>H NMR (CDCl<sub>3</sub>, 400 MHz): δ = 2.65 (d, *J* = 2.8 Hz, 1H), 4.92 (d, *J* = 7.5 Hz, 1H), 5.65 (dd, *J* = 2.8, 7.5 Hz, 1H), 6.98–7.02 (m, 1H), 7.14–7.18 (m, 1H), 7.33–7.49 (m, 9H), 7.61–7.76 (m, 8H), 8.16 (s, 1H). <sup>13</sup>C NMR (CDCl<sub>3</sub>, 100 MHz): δ = 51.7, 77.5, 111.1, 115.0, 119.4, 119.7, 122.4, 122.8, 124.7, 125.4, 125.6, 125.7, 125.8, 125.8, 127.1, 127.2, 127.5, 127.5, 127.6, 127.8, 128.0, 128.0, 132.2, 132.8, 133.1, 133.3, 136.3, 136.6, 139.3, 139.9. IR (neat): 3540, 3415, 3051, 3029, 2887, 1679, 1618, 1455, 1395, 1242, 1222, 1069, 1034, 929, 812, 740, 689 cm<sup>-1</sup>. HRMS (ESI-TOF) calcd for C<sub>30</sub>H<sub>24</sub>NO<sup>+</sup> ([M+H]<sup>+</sup>): 414.1852, found: 414.1835. [α]<sub>D</sub><sup>24</sup> –159.7 (*c* = 1.0, MeOH, 96% ee). HPLC (Daicel Chiralpak<sup>®</sup> AD-H, hexane/*i*-PrOH = 80/20, flow rate = 1.0 mL/min, λ = 220 nm) t<sub>R</sub> = 35.2 min (minor), t<sub>R</sub> = 46.8 min (major).



### (1*R*,2*R*)-1,2-bis(4-Chlorophenyl)-2-(1*H*-indol-3-yl)ethanol (Scheme 1)

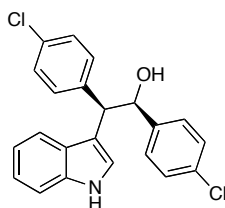

According to the general procedure with 60.0 mg *cis*-2,3-bis(4-chlorophenyl)oxirane and 31.8 mg indole, the product was isolated as a white solid (m.p. = 149–150 °C). Reaction time = 30 h. <sup>1</sup>H NMR (CDCl<sub>3</sub>, 400 MHz): δ = 2.52 (d, *J* = 2.7 Hz, 1H), 4.50 (d, *J* = 8.1 Hz, 1H), 5.27 (dd, *J* = 2.7, 8.1 Hz, 1H), 7.04–7.08 (m, 3H), 7.10–7.16 (m, 4H), 7.18–7.22 (m, 3H), 7.32–7.33 (m, 1H), 7.37 (dt, *J* = 0.8, 8.0 Hz, 1H), 7.42 (dq, *J* = 0.8, 8.0 Hz, 1H), 8.20 (s, 1H). <sup>13</sup>C NMR (CDCl<sub>3</sub>, 100 MHz): δ = 51.6, 111.3, 114.6, 119.2, 119.9, 122.2, 122.6, 127.2, 128.1, 128.2, 128.4, 128.5, 129.9, 132.2, 133.2, 136.3, 139.8, 140.5. IR (neat): 3413, 3051, 2889, 1899, 1618, 1488, 1410, 1246, 1168, 1088, 1034, 1012, 855, 821, 741 cm<sup>-1</sup>. HRMS (ESI-TOF) calcd for C<sub>22</sub>H<sub>17</sub>Cl<sub>2</sub>NO<sup>+</sup> ([M\*]<sup>+</sup>): 382.0715, found: 382.0711. [α]<sub>D</sub><sup>24</sup> -144.2 (*c* = 0.5, MeOH, 99% ee). HPLC (Daicel Chiralpak<sup>®</sup> AD-H, hexane/*i*-PrOH = 80/20, flow rate = 0.8 mL/min, λ = 220 nm) t<sub>R</sub> = 22.6 min (minor), t<sub>R</sub> = 26.7 min (major).

### Procedure for the Kinetic Resolution of *trans*-Stilbene Oxide with Indole

A mixture of Fe(ClO<sub>4</sub>)<sub>2</sub>·6H<sub>2</sub>O (18.1 mg, 0.05 mmol), Bolm's ligand **1** (19.7 mg, 0.06 mmol) and 4Å MS (50 mg) in distilled CH<sub>2</sub>Cl<sub>2</sub> (0.5 mL) was stirred at room temperature for 0.5 h and then placed at the desired temperature (-20 °C). The indole (0.3 mmol) and the epoxide (0.6 mmol) were then subsequently added to the mixture. The reaction mixture was stirred at -20 °C for 42 hours and was then directly poured onto silica-gel column and eluted with CH<sub>2</sub>Cl<sub>2</sub> to give the desired products. The unreacted *trans*-stilbene oxide was purified on silica-gel column and eluted with a mixture of hexanes and AcOEt (99:1). 85% of the unreacted epoxide was isolated and the enantiomeric ratio was determined by chiral HPLC analysis.

### (1*R*,2*S*)-2-(1*H*-Indol-3-yl)-1,2-diphenylethanol (Scheme 2)<sup>9</sup>

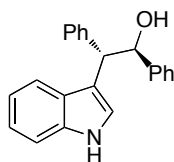

According to the procedure for the kinetic resolution with 35.1 mg racemic *trans*-stilbene oxide and 117.7 mg indole at -20 °C, the product was isolated as a white solid (m.p. = 131–133 °C). Reaction time = 42 h. <sup>1</sup>H NMR (CDCl<sub>3</sub>, 400 MHz): δ = 1.97 (brs, 1H), 4.63 (d, *J* = 6.6 Hz, 1H), 5.49 (d, *J* = 6.6 Hz, 1H), 6.97–7.01 (m, 1H), 7.11–7.15 (m, 1H), 7.20–7.34 (m, 13H), 7.98 (brs, 1H). <sup>13</sup>C NMR (CDCl<sub>3</sub>, 100 MHz): δ = 50.9, 76.6, 110.9, 116.8, 119.2, 119.4, 122.0, 122.5, 126.6, 126.8, 127.0, 127.4, 128.0, 128.3, 128.4, 135.9, 140.2,



142.8. IR (neat): 3530, 3306, 3025, 2888, 1590, 1460, 1422, 1337, 1324, 1132, 1088, 1018, 987, 740, 667. HRMS (ESI-TOF) calcd for  $C_{22}H_{20}NO^+$  ( $[M+H]^+$ ): 314.1539, found: 314.1517.  $[\alpha]_D^{24} +0.265$  ( $c = 1.0$ ,  $CHCl_3$ , 54% ee). HPLC (Daicel Chiralpak<sup>®</sup> AD-H, hexane/*i*-PrOH = 70/30, flow rate = 0.7 mL/min,  $\lambda = 220$  nm)  $t_R = 20.6$  min (minor),  $t_R = 25.6$  min (major).

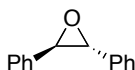

The unreacted *trans*-stilbene oxide was purified on silica-gel column and eluted with a mixture of hexanes and AcOEt (99:1). 85% (61.2 mg) of the unreacted epoxide was isolated. <sup>1</sup>H NMR ( $CDCl_3$ , 400 MHz):  $\delta = 7.41$ - $7.33$  (m, 10H), 3.87 (s, 2H). HPLC (Daicel Chiralcel<sup>®</sup> OD-H, hexane/*i*-PrOH = 95/5, flow rate = 0.5 mL/min,  $\lambda = 254$  nm)  $t_R = 12.8$  min (minor),  $t_R = 19.3$  min (major).

### Crystallization of $[FeBr_2 \cdot 1] \cdot (H_2O) \cdot 2THF$ Complex

Crystallization of  $[FeBr_2 \cdot 1] \cdot (H_2O) \cdot 2THF$  was carried out as follows: A mixture of  $FeBr_2$  (5.0 mg, 23.2  $\mu$ mol) and Bolm's ligand **1** (7.6 mg, 23.2  $\mu$ mol) was dissolved in THF (0.25 mL). This solution was stirred at room temperature for 30 min and then cooled down to  $-18$  °C. Crystals were obtained after 48 h.

CCDC 864123 ( $[1 \cdot Fe \cdot 2THF \cdot H_2O]^{2+} \cdot 2Br^-$ ) contains the supplementary crystallographic data for this paper. These data can be obtained free of charge from The Cambridge Crystallographic Data Centre *via* [www.ccdc.cam.ac.uk/data\\_request/cif](http://www.ccdc.cam.ac.uk/data_request/cif).

### References

- 1 (a) E. Mai and C. Schneider, *Chem. Eur. J.*, 2007, **13**, 2729; (b) J. P. K. Wong, A. A. Fahmi, G. W. Griffin, N. S. Bhacca, *Tetrahedron*, 1981, **37**, 3345.
- 2 (a) C. Bolm, M. Ewald, M. Felder and G. Schlingloff, *Chem. Ber.*, 1992, **125**, 1169; (b) S. Ishikawa, T. Hamada, K. Manabe and S. Kobayashi, *Synthesis*, 2005, 2176.
- 3 Iron powder (111.7 mg, 2 mmol) was suspended in 2 mL distilled water and freshly distilled triflic acid (354  $\mu$ L, 4 mmol) was added. The mixture was refluxed for 30 minutes and the resulting solution was filtered and evaporated. The white solid obtained was dried under high vacuum to afford  $Fe(OTf)_2 \cdot H_2O$  quantitatively. Thermogravimetric analysis confirmed the presence of one hydration water molecule. (M. Seredyuk, A. B. Gaspar, M. C. Muñoz, M. Verdaguer, F. Villain, P. Gütllich, *Eur. J. Inorg. Chem.* 2007, 4481.)
- 4 W. C. Still, M. Kahn, A. Mitra, *J. Org. Chem.*, 1978, **43**, 2923.
- 5 M. W. Zettler, "Iron(II) Perchlorate", *e-EROS: Electronic Encyclopedia of Reagent for Organic Synthesis*; Wiley-VCH; 2001.
- 6 M. Bandini, P. G. Cozzi, P. Melchiorre and A. Umani-Ronchi, *Angew. Chem. Int. Ed.*, 2004, **43**, 84
- 7 M. Boudou, C. Ogawa, S. Kobayashi, *Adv. Synth. Catal.*, 2006, **348**, 2585.
- 8 M. Kokubo, T. Naito, S. Kobayashi, *Tetrahedron*, 2010, **66**, 1111.
- 9 H. Kotsuki, M. Nishiuchi, S. Kobayashi, H. Nishizawa, *J. Org. Chem.*, 1990, **55**, 2969.

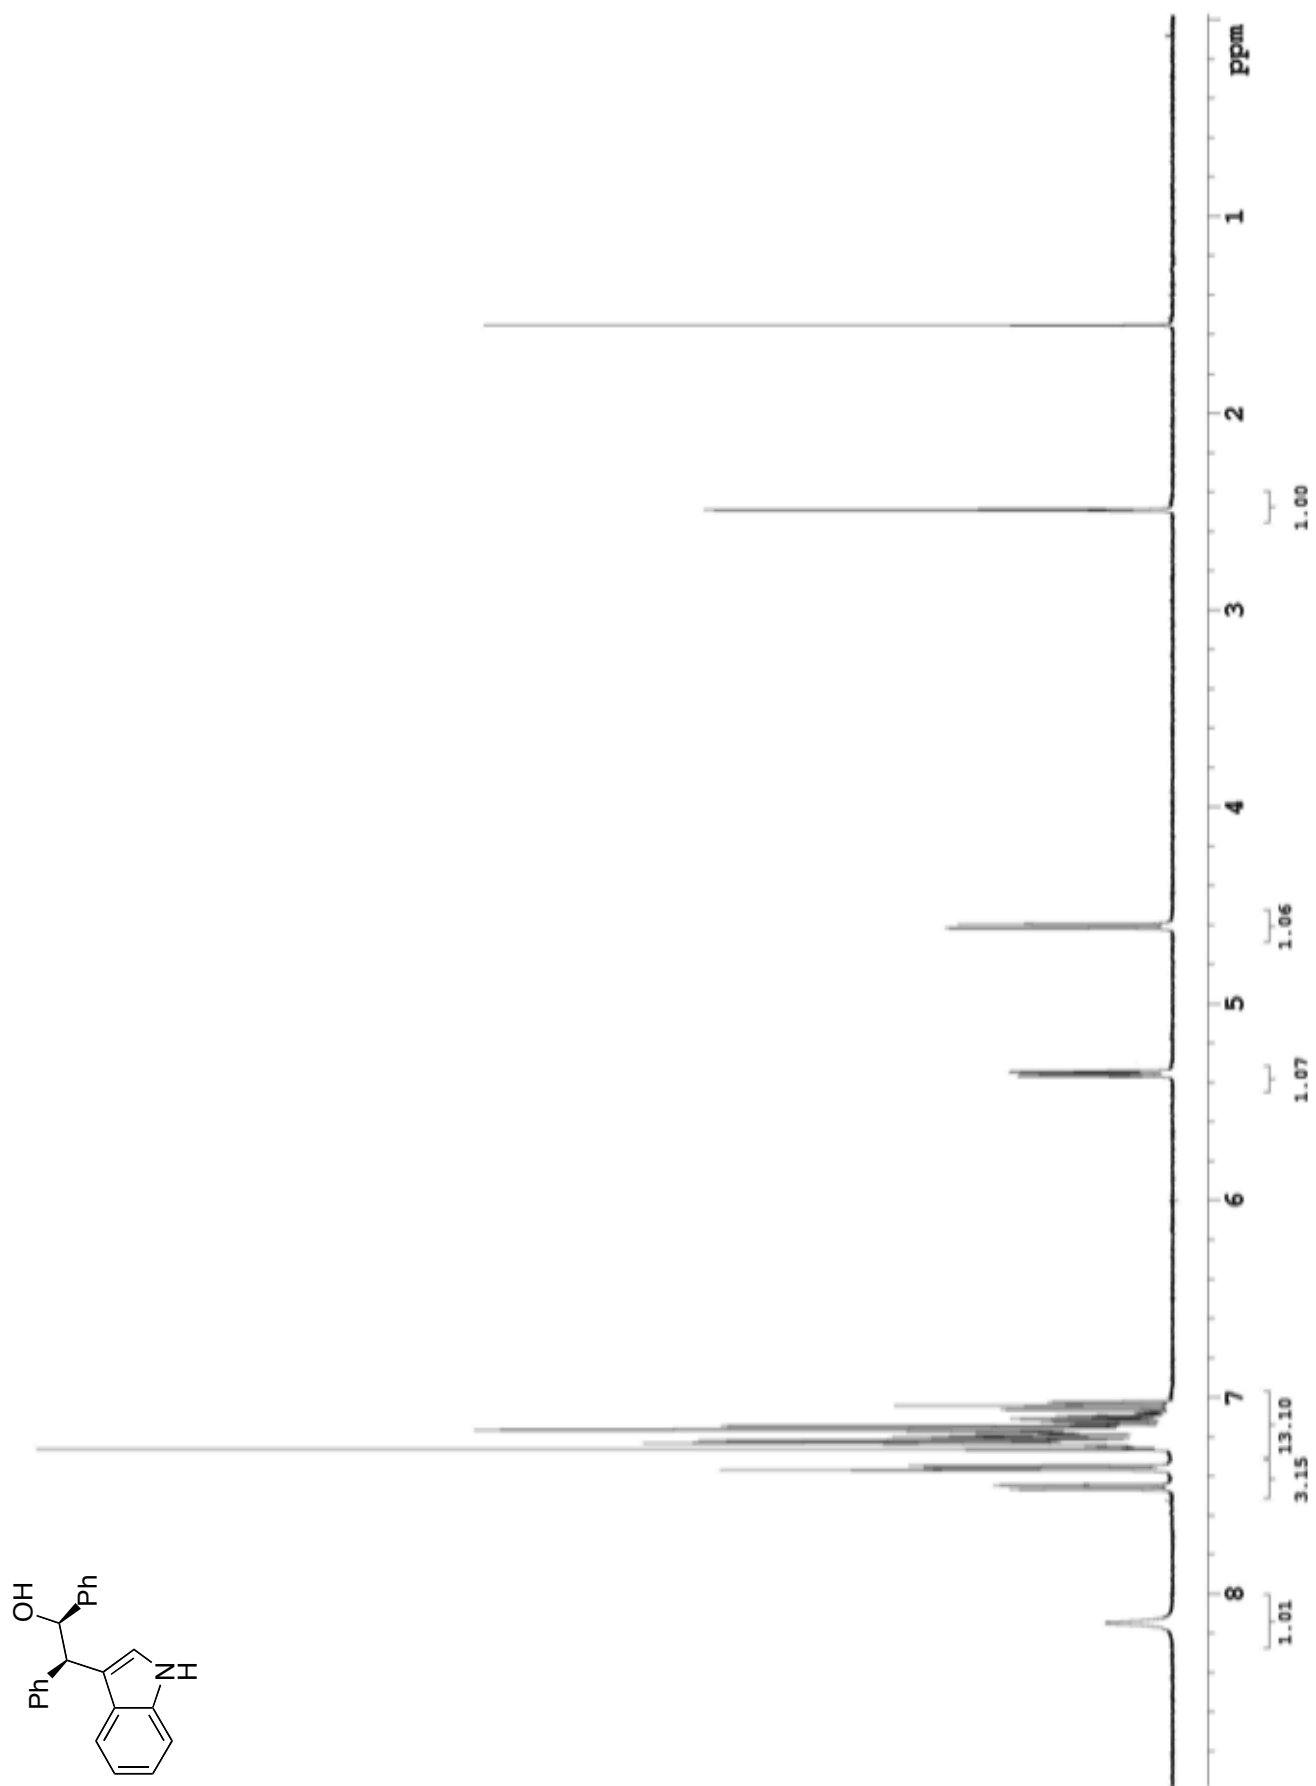

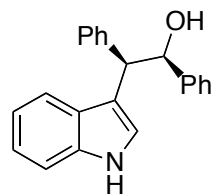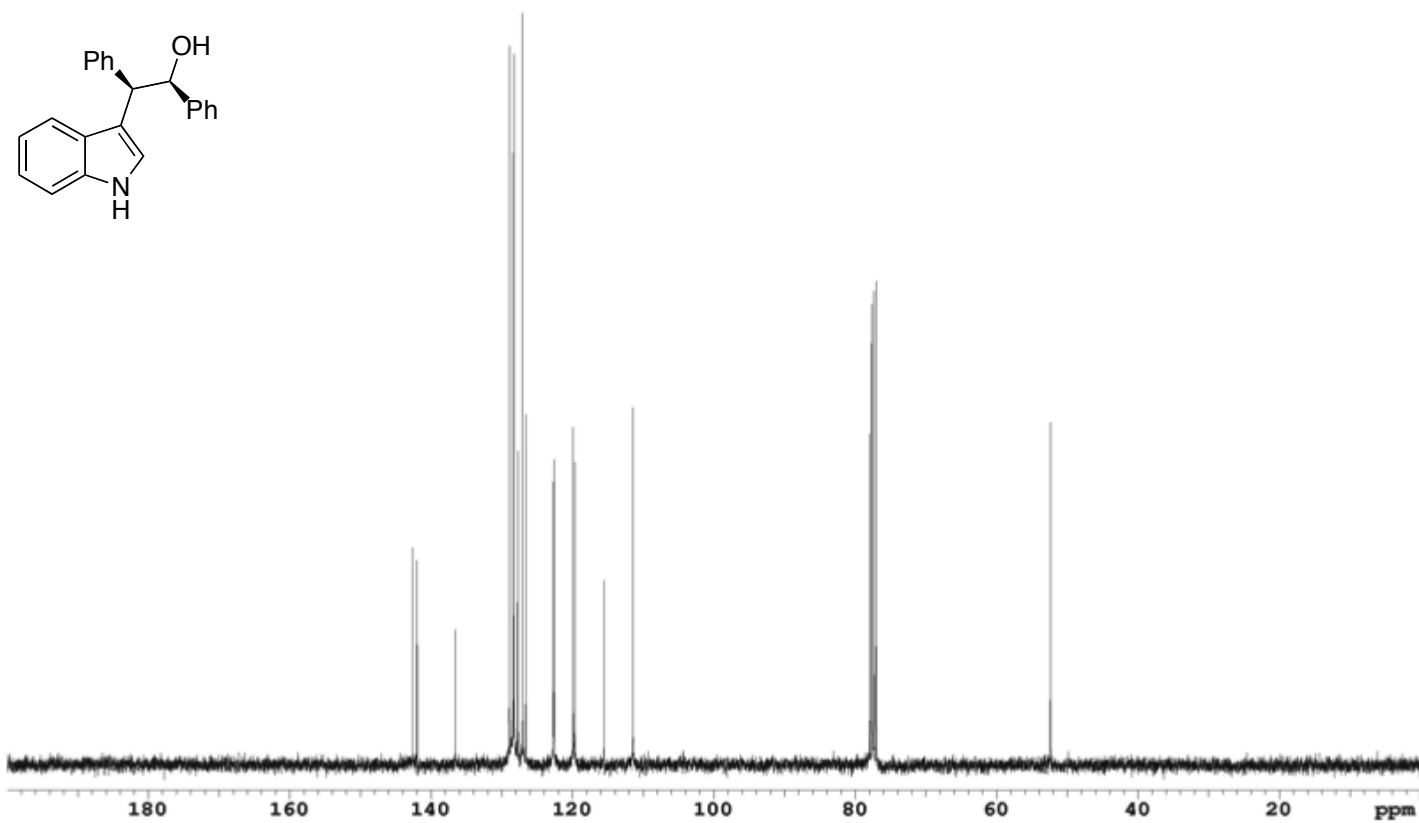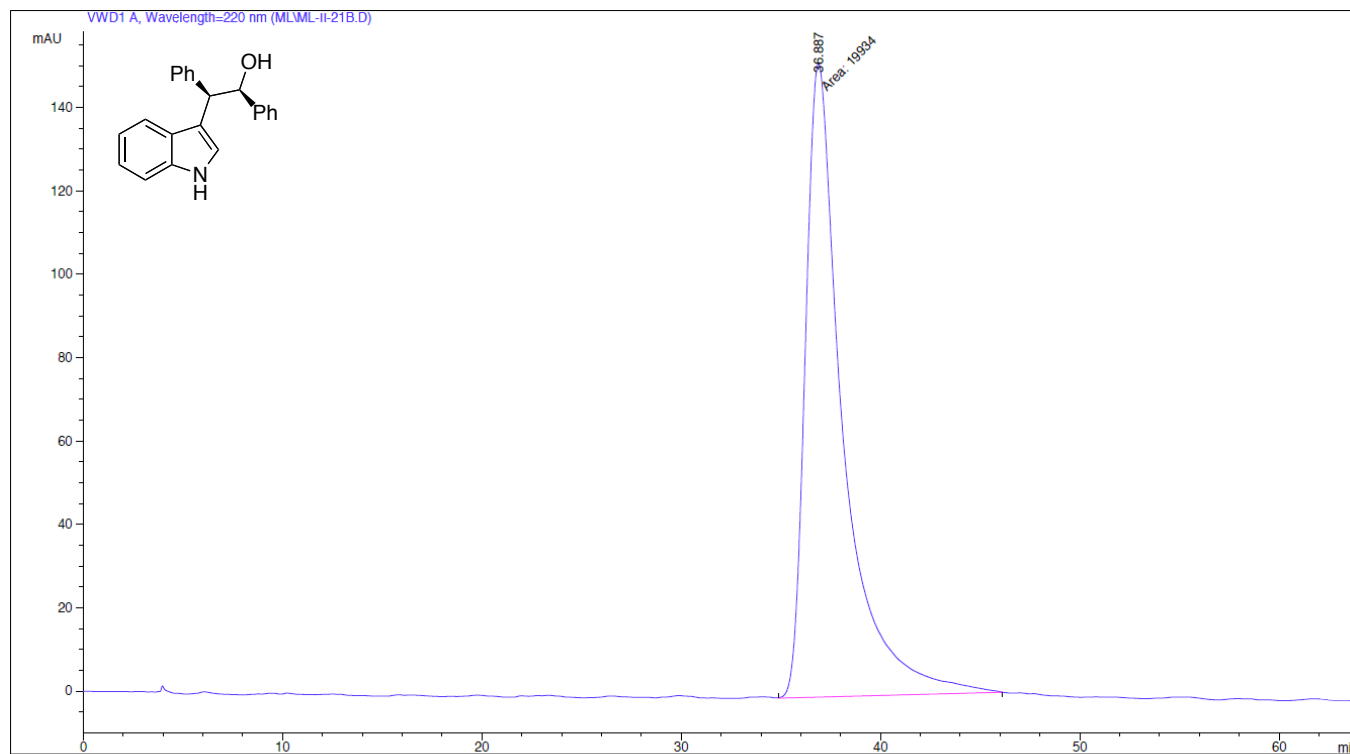

Signal 1: VWD1 A, Wavelength=220 nm

| Peak # | RetTime [min] | Type | Width [min] | Area mAU *s | Height [mAU] | Area %   |
|--------|---------------|------|-------------|-------------|--------------|----------|
| 1      | 36.887        | MM   | 2.1875      | 1.99340e4   | 151.88126    | 100.0000 |

Totals : 1.99340e4 151.88126

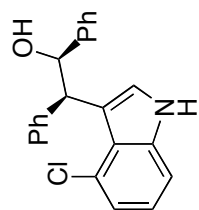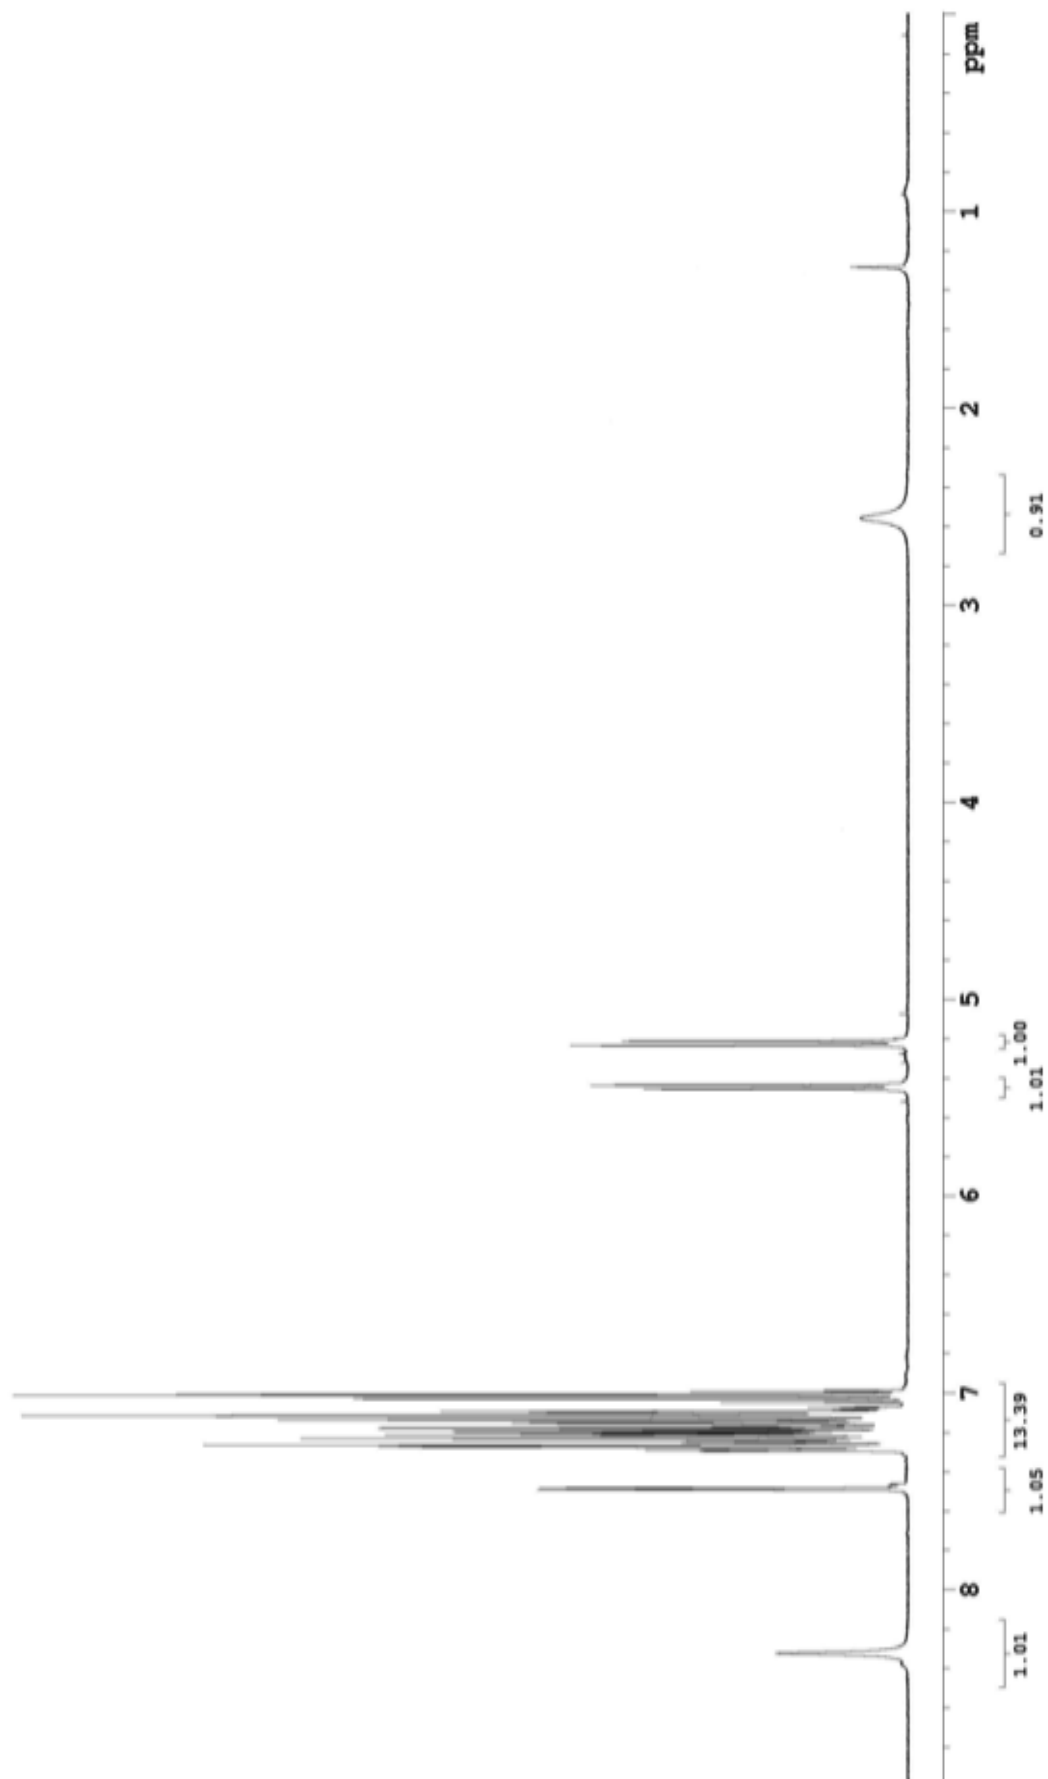

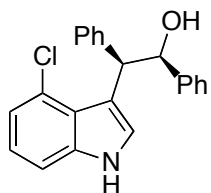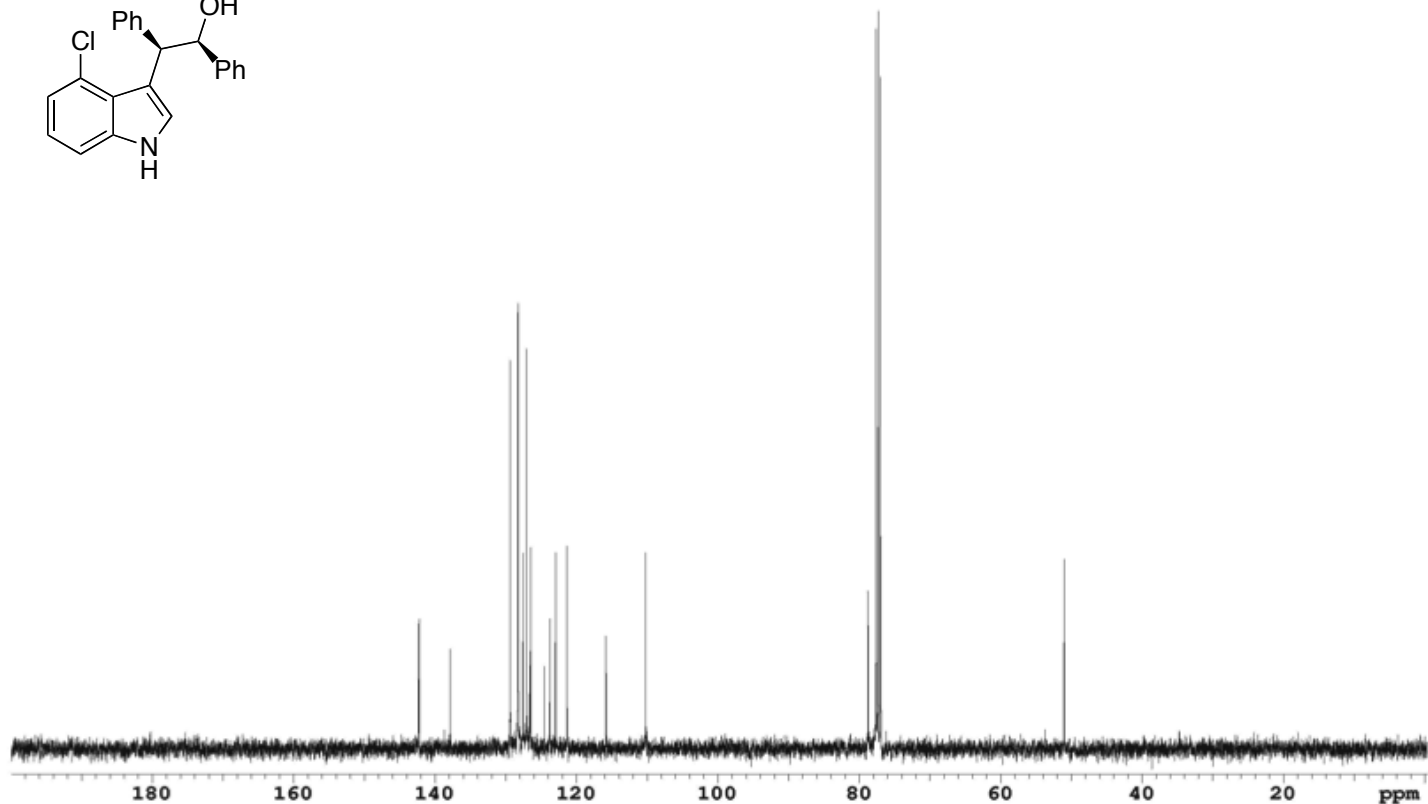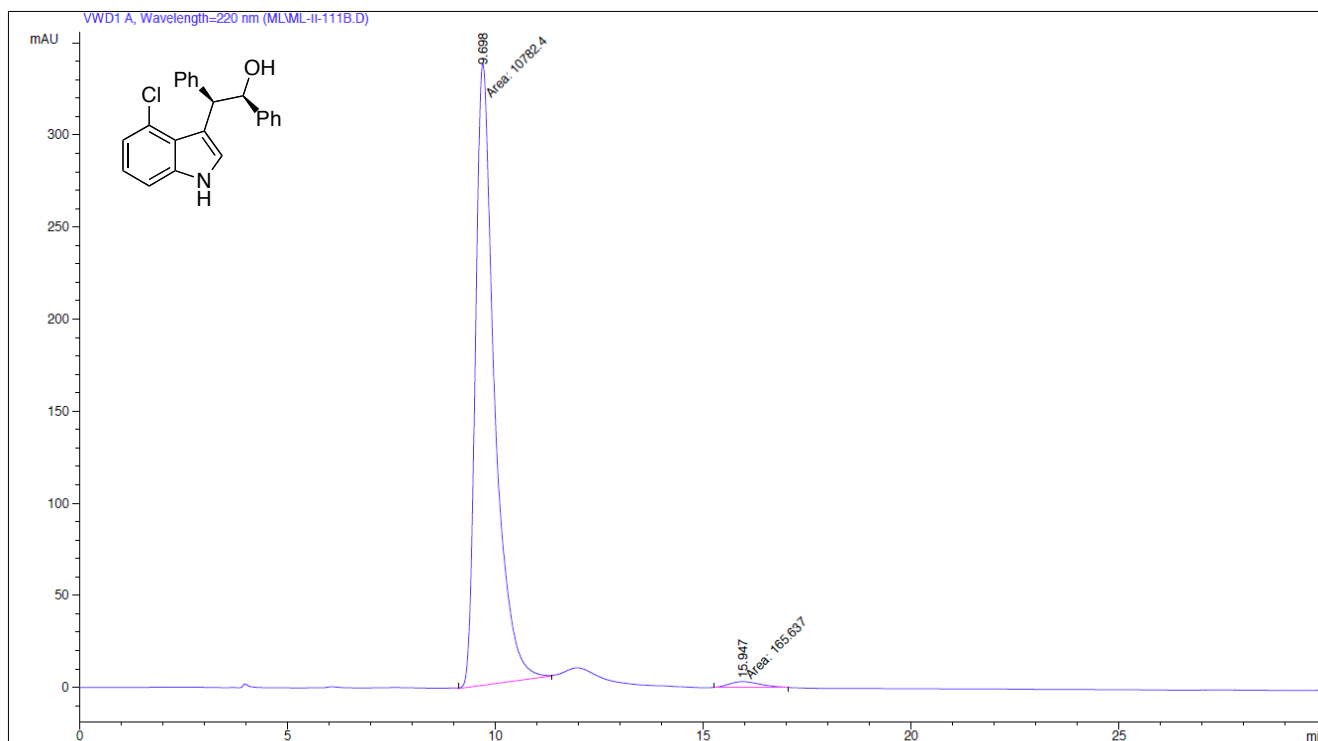

Signal 1: VWD1 A, Wavelength=220 nm

| Peak # | RetTime [min] | Type | Width [min] | Area mAU *s | Height [mAU] | Area %  |
|--------|---------------|------|-------------|-------------|--------------|---------|
| 1      | 9.698         | MM   | 0.5324      | 1.07824e4   | 337.54364    | 98.4871 |
| 2      | 15.947        | MM   | 0.8668      | 165.63678   | 3.18496      | 1.5129  |

Totals : 1.09481e4 340.72860

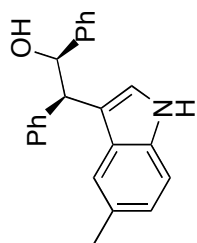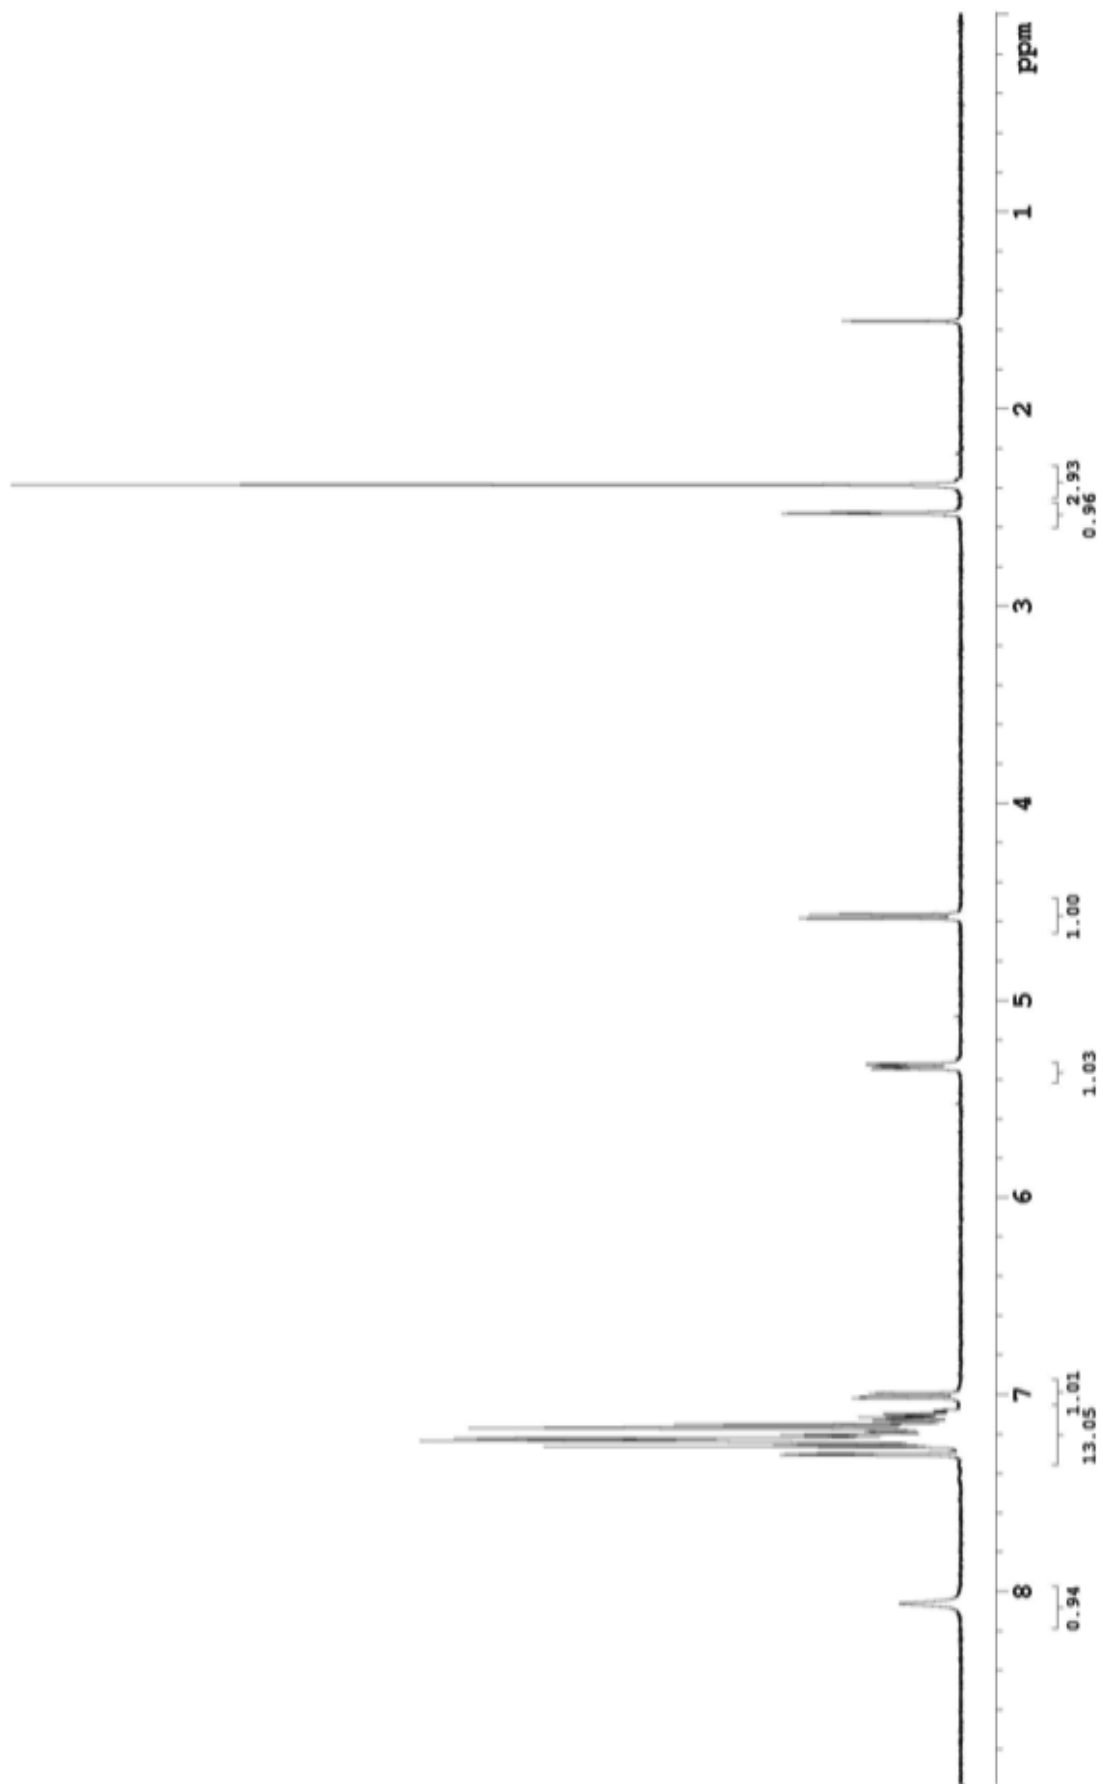

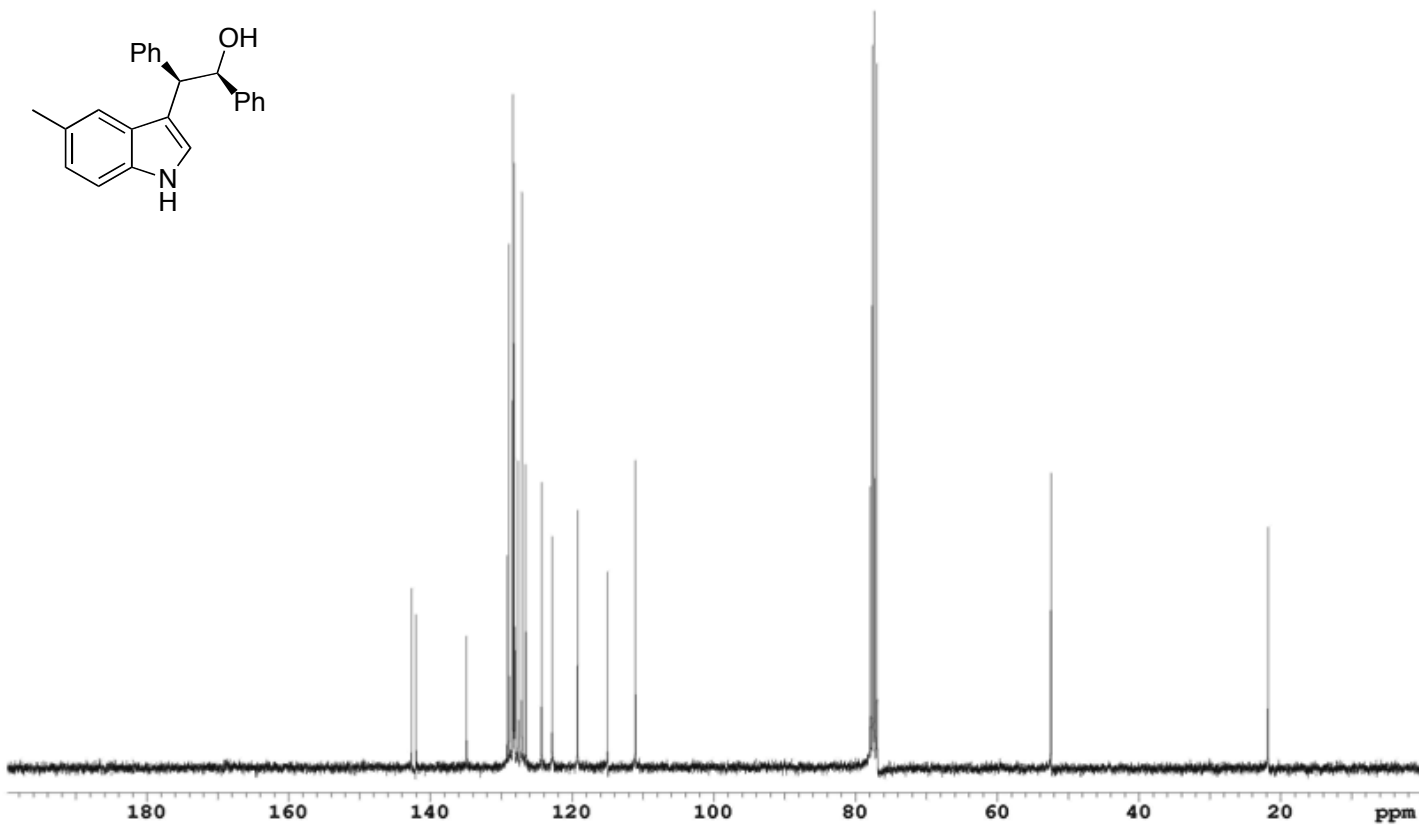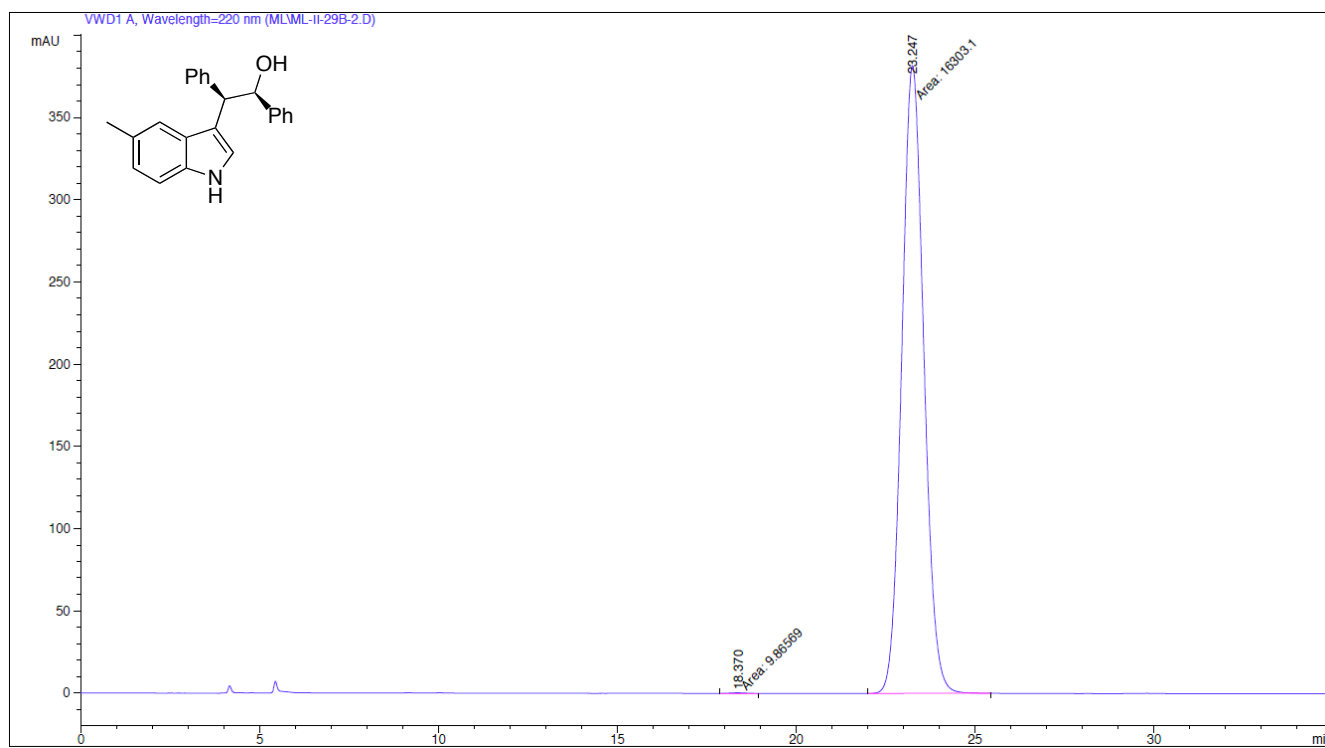

| Peak #   | RetTime [min] | Type | Width [min] | Area mAU  | Area *s    | Height [mAU] | Area % |
|----------|---------------|------|-------------|-----------|------------|--------------|--------|
| 1        | 18.370        | MM   | 0.5433      | 9.86569   | 3.02664e-1 | 0.0605       |        |
| 2        | 23.247        | MM   | 0.7118      | 1.63031e4 | 381.73770  | 99.9395      |        |
| Totals : |               |      |             | 1.63130e4 | 382.04037  |              |        |



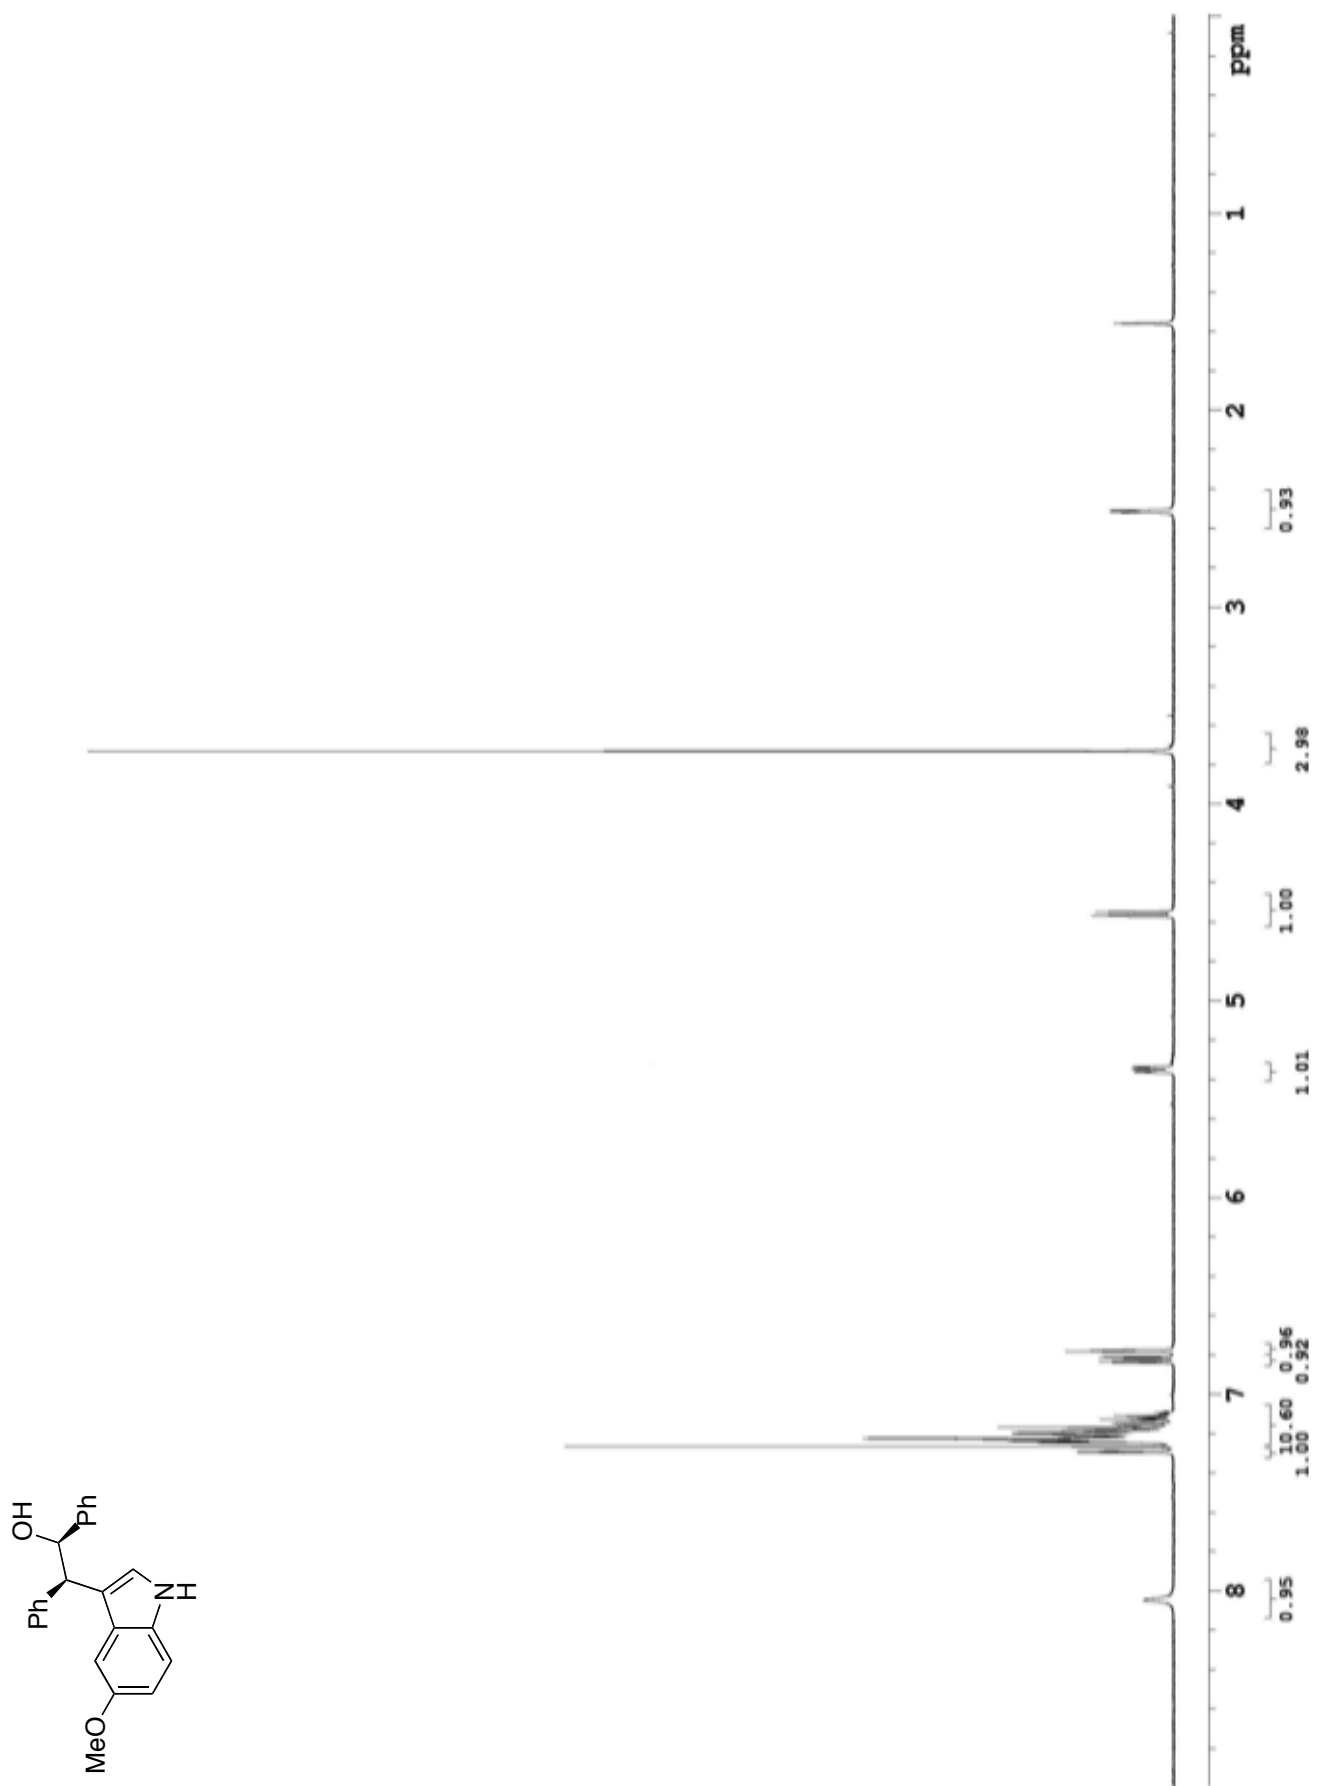

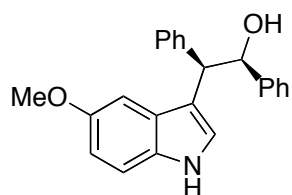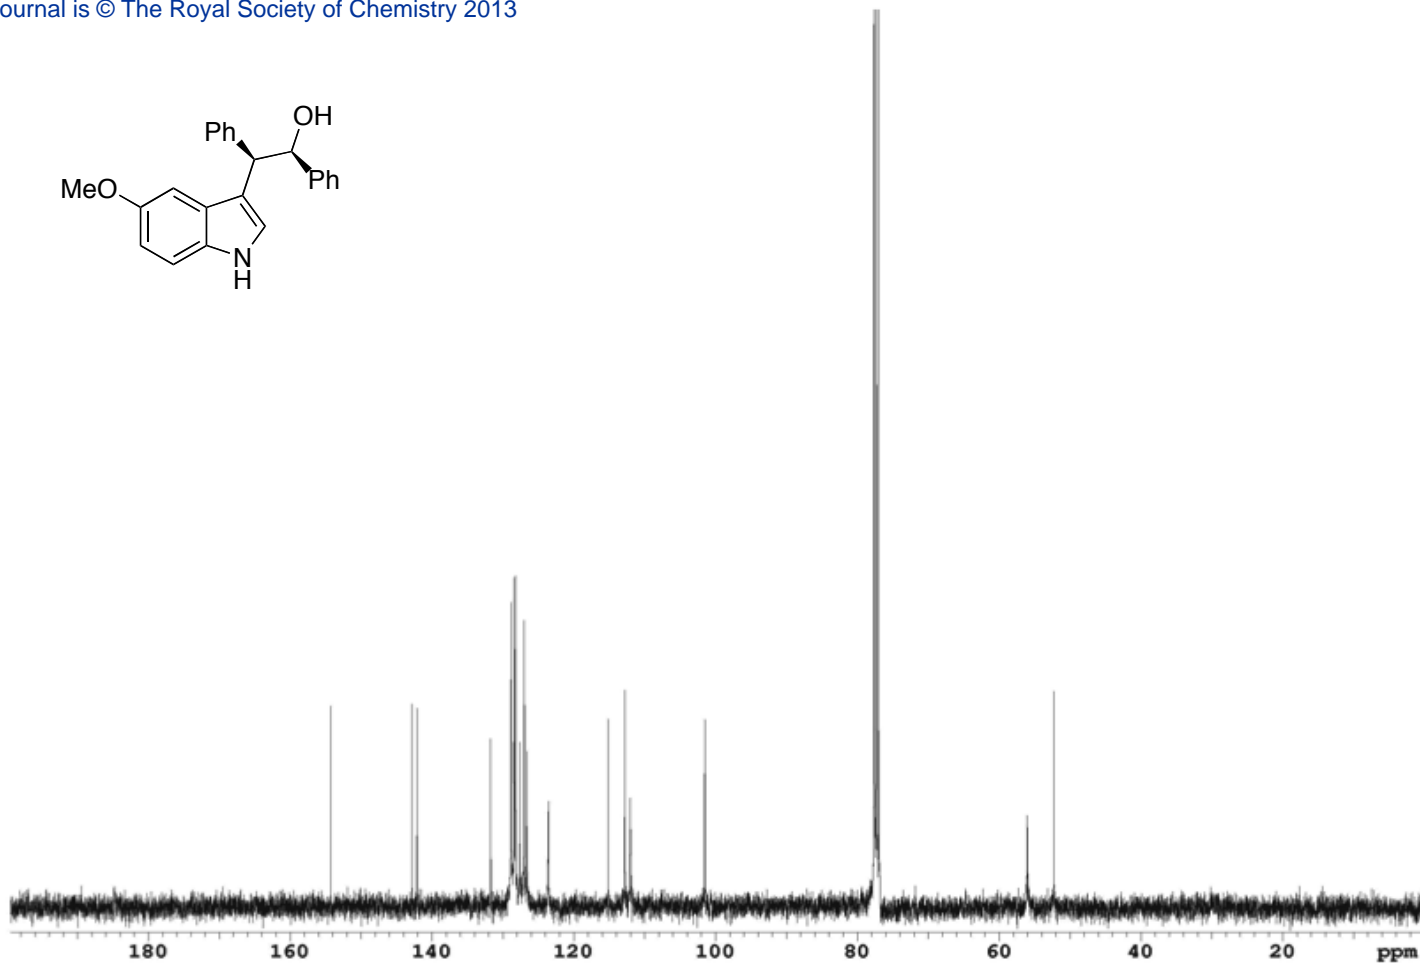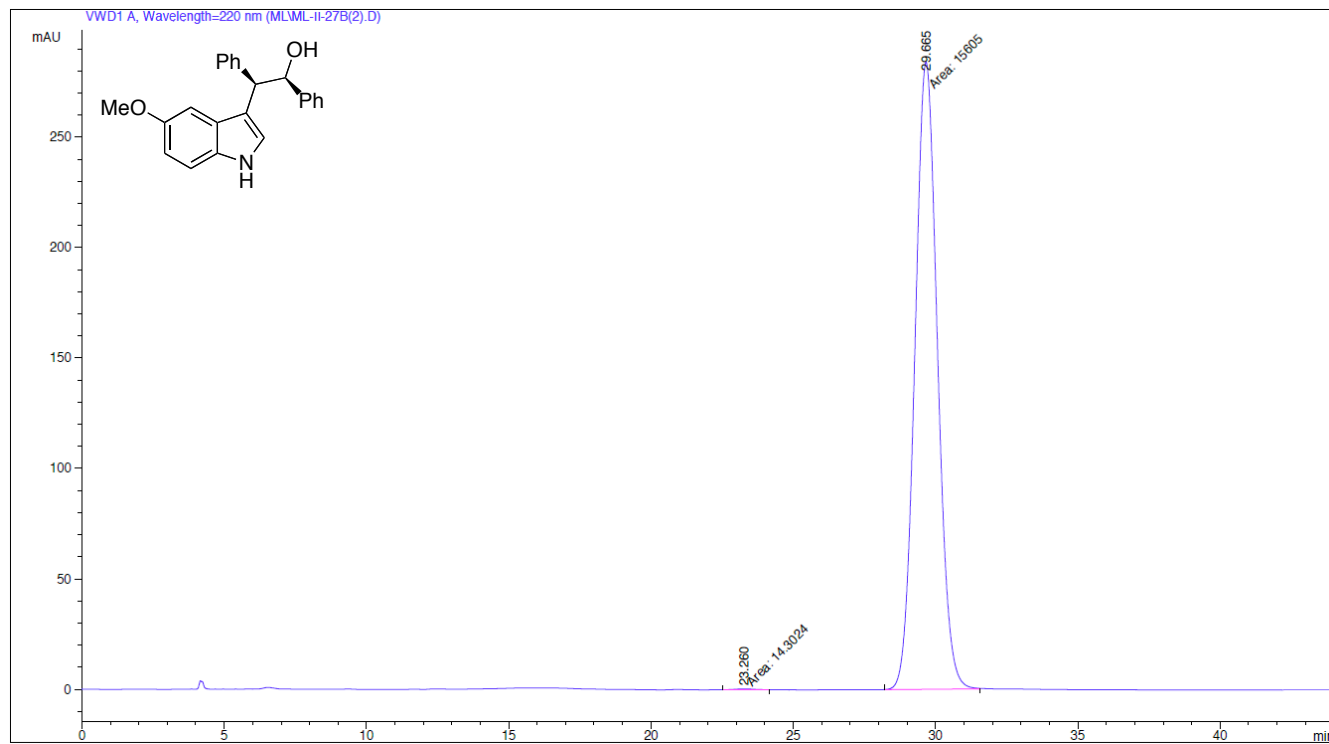

Signal 1: VWD1 A, Wavelength=220 nm

| Peak # | RetTime [min] | Type | Width [min] | Area mAU *s | Height [mAU] | Area %  |
|--------|---------------|------|-------------|-------------|--------------|---------|
| 1      | 23.260        | MM   | 0.7377      | 14.30244    | 3.23110e-1   | 0.0916  |
| 2      | 29.665        | MM   | 0.9156      | 1.56050e4   | 284.06409    | 99.9084 |

Totals : 1.56193e4 284.38720

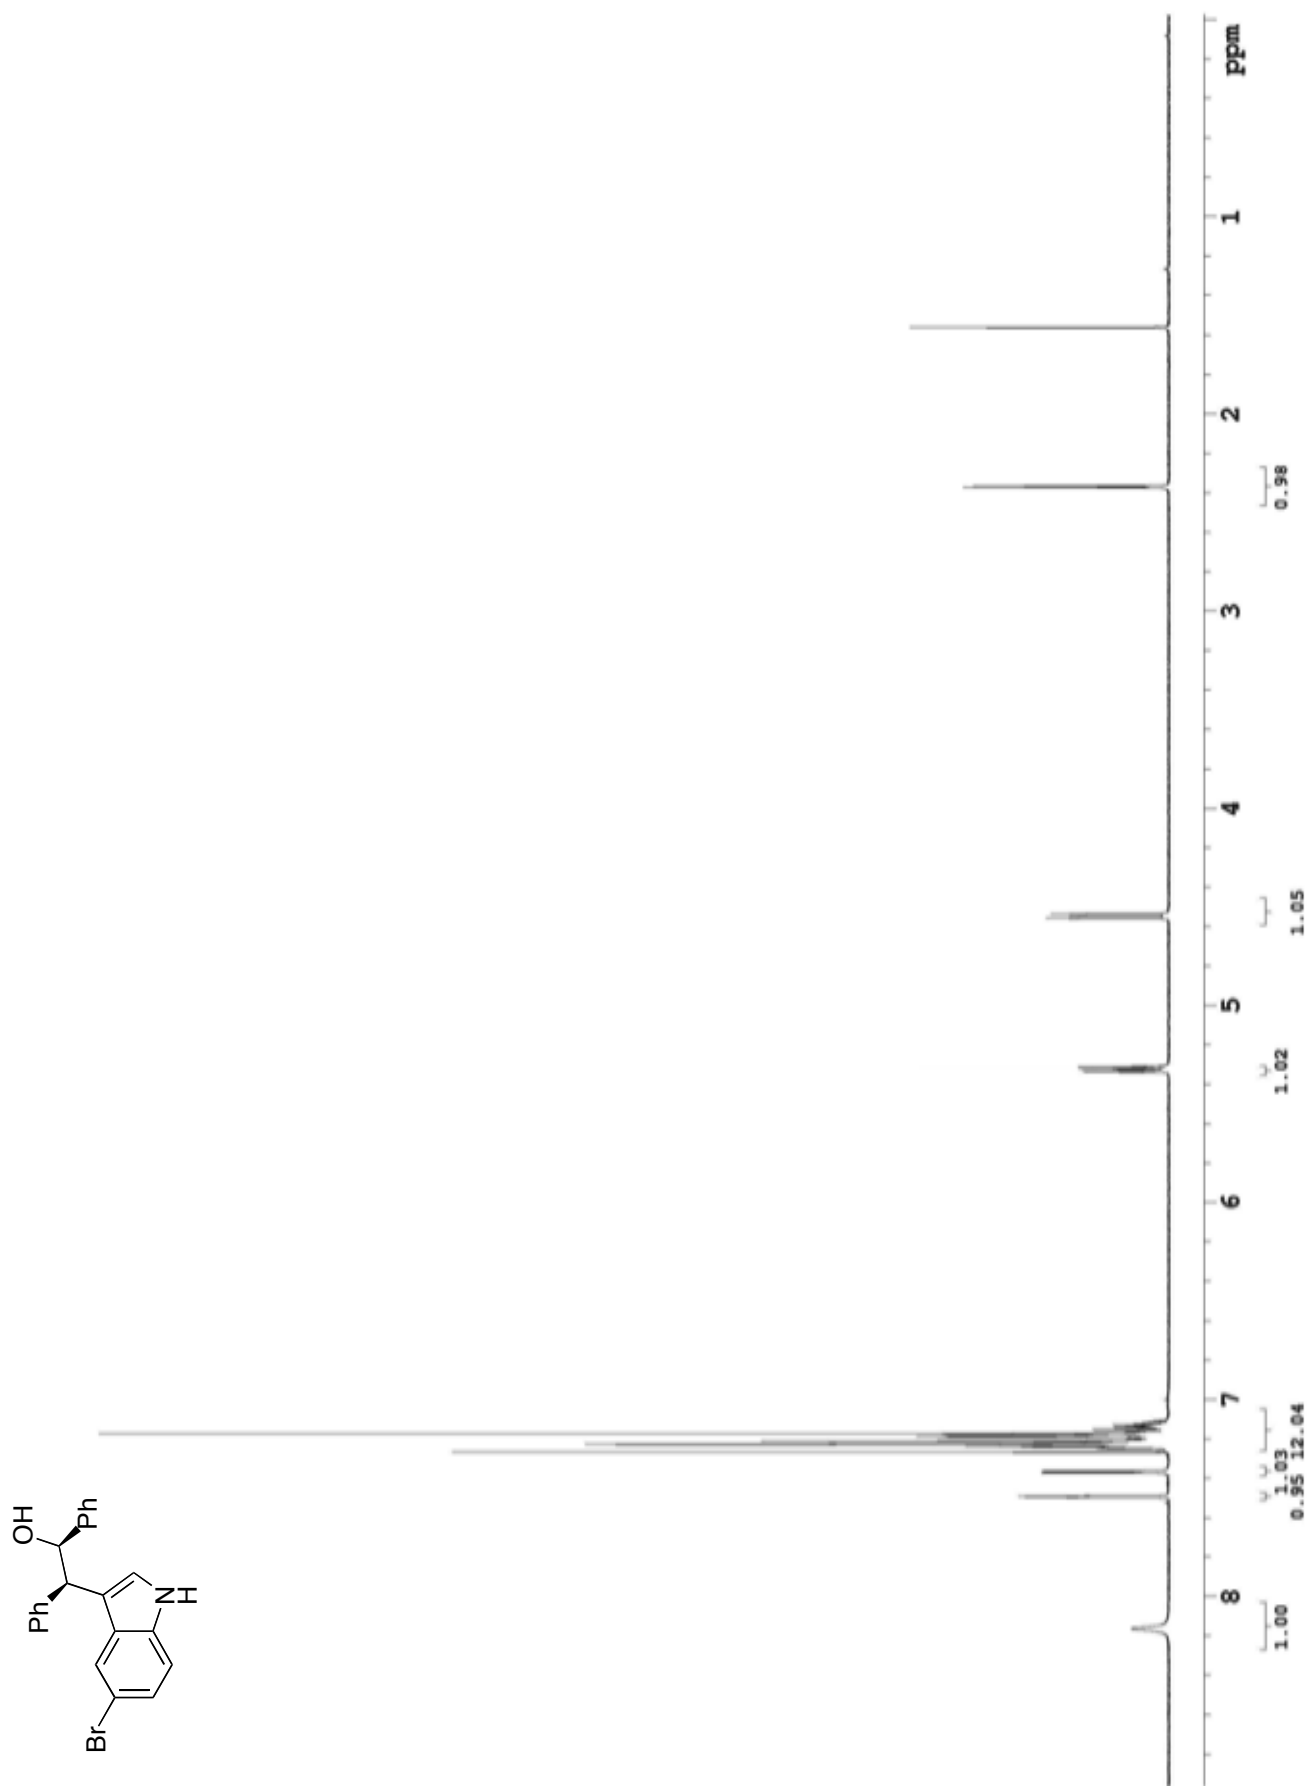

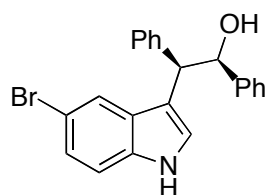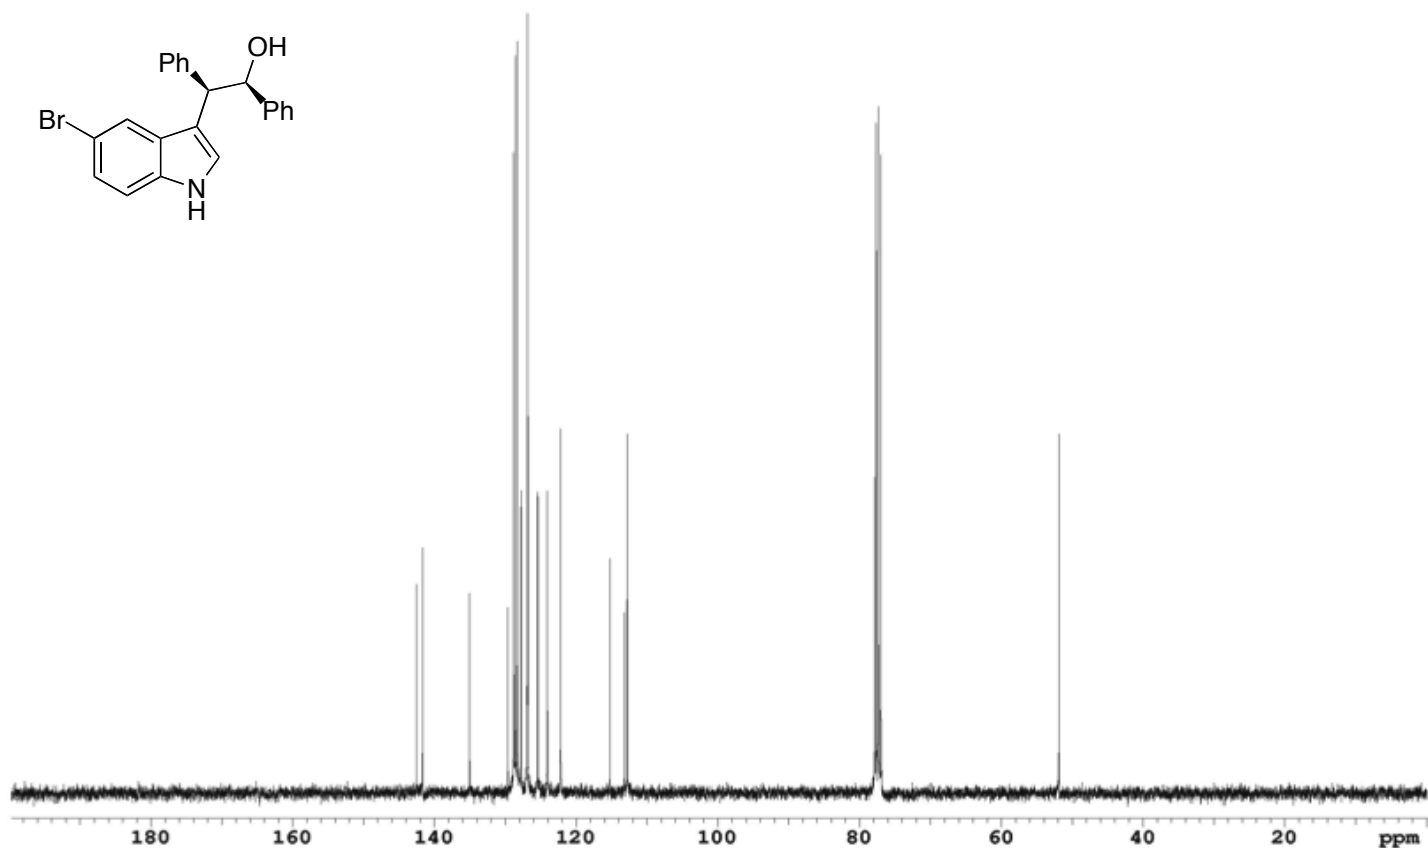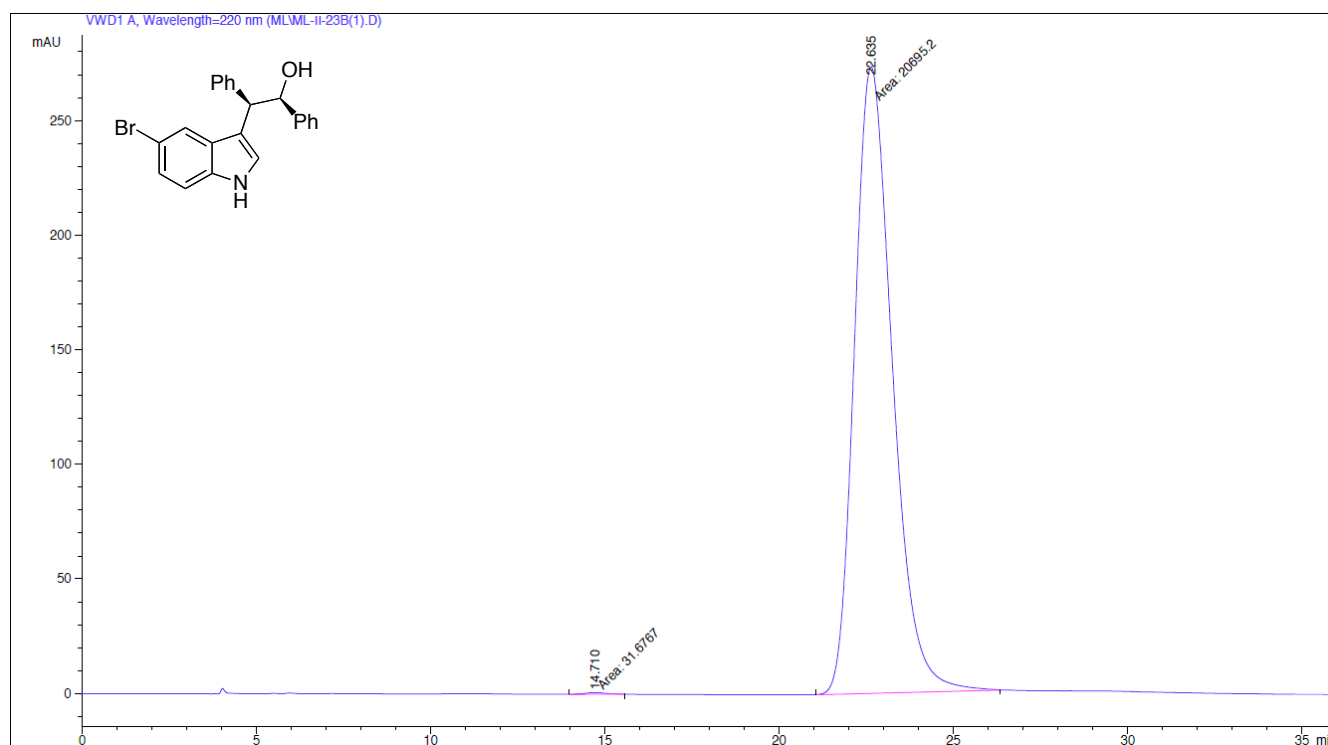

Signal 1: VWD1 A, Wavelength=220 nm

| Peak # | RetTime [min] | Type | Width [min] | Area mAU  | Area *s    | Height [mAU] | Area %  |
|--------|---------------|------|-------------|-----------|------------|--------------|---------|
| 1      | 14.710        | MM   | 0.7720      | 31.67671  | 6.83902e-1 | 0.1528       | 0.1528  |
| 2      | 22.635        | MM   | 1.2610      | 2.06952e4 | 273.52768  | 99.8472      | 99.8472 |

Totals : 2.07269e4 274.21158

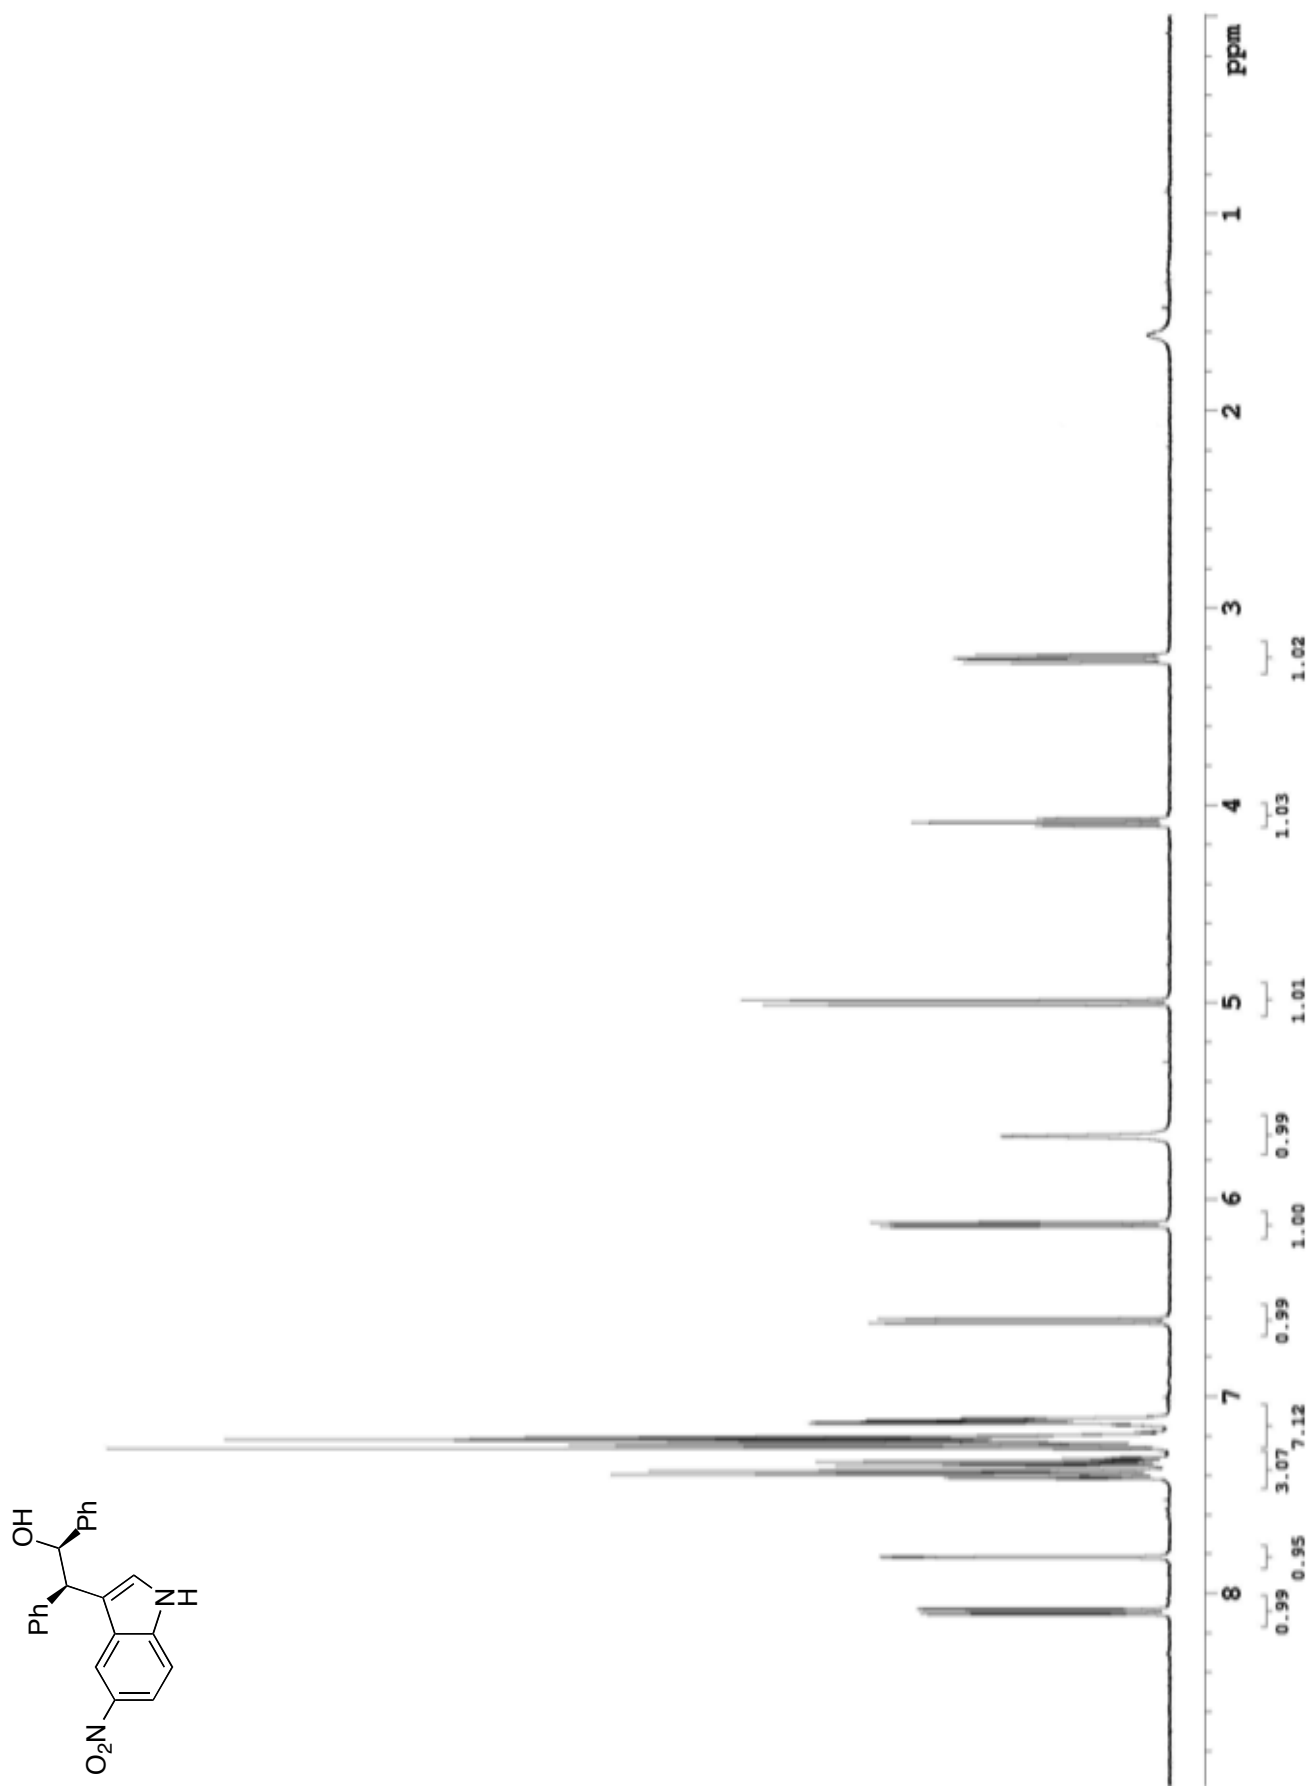

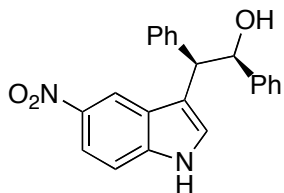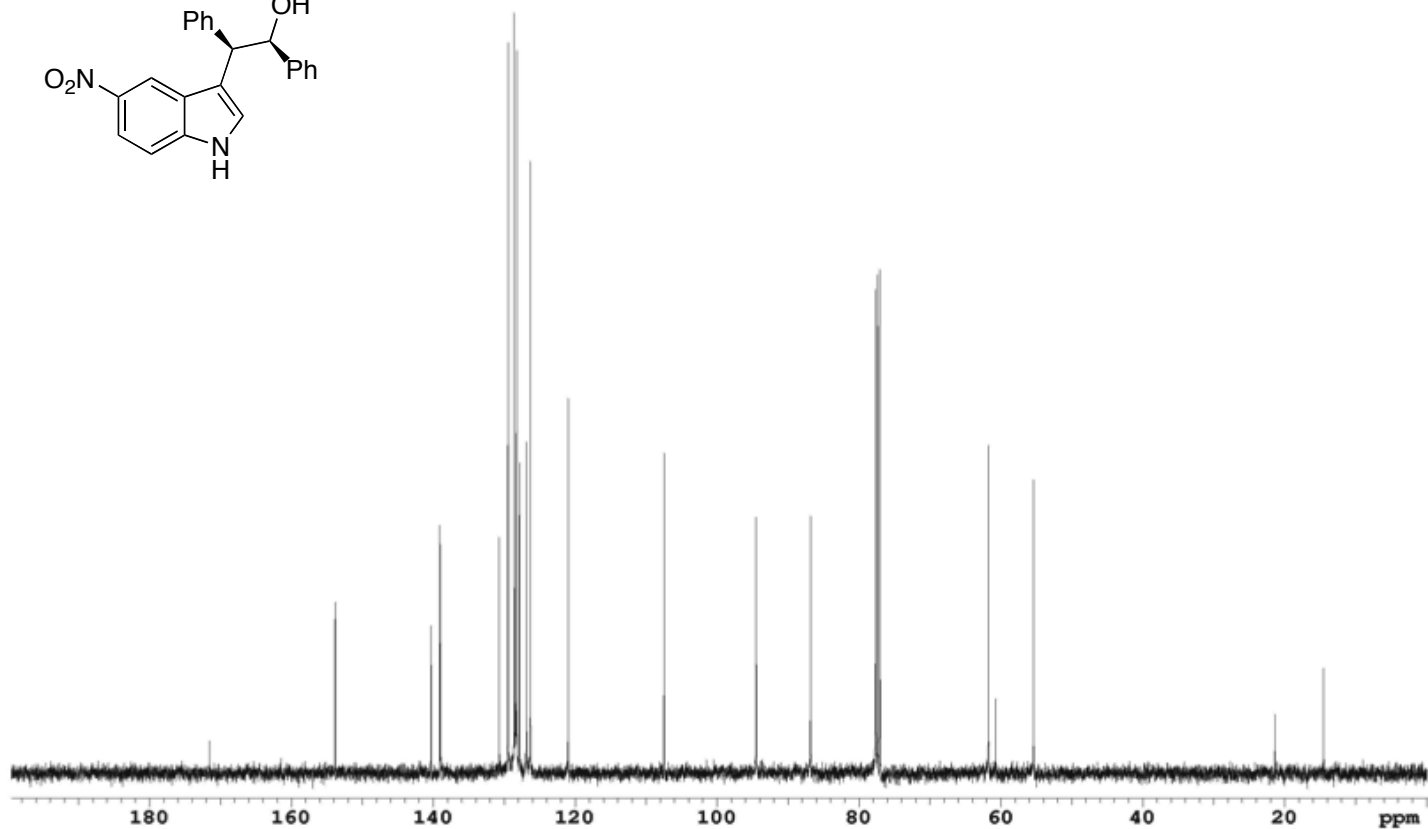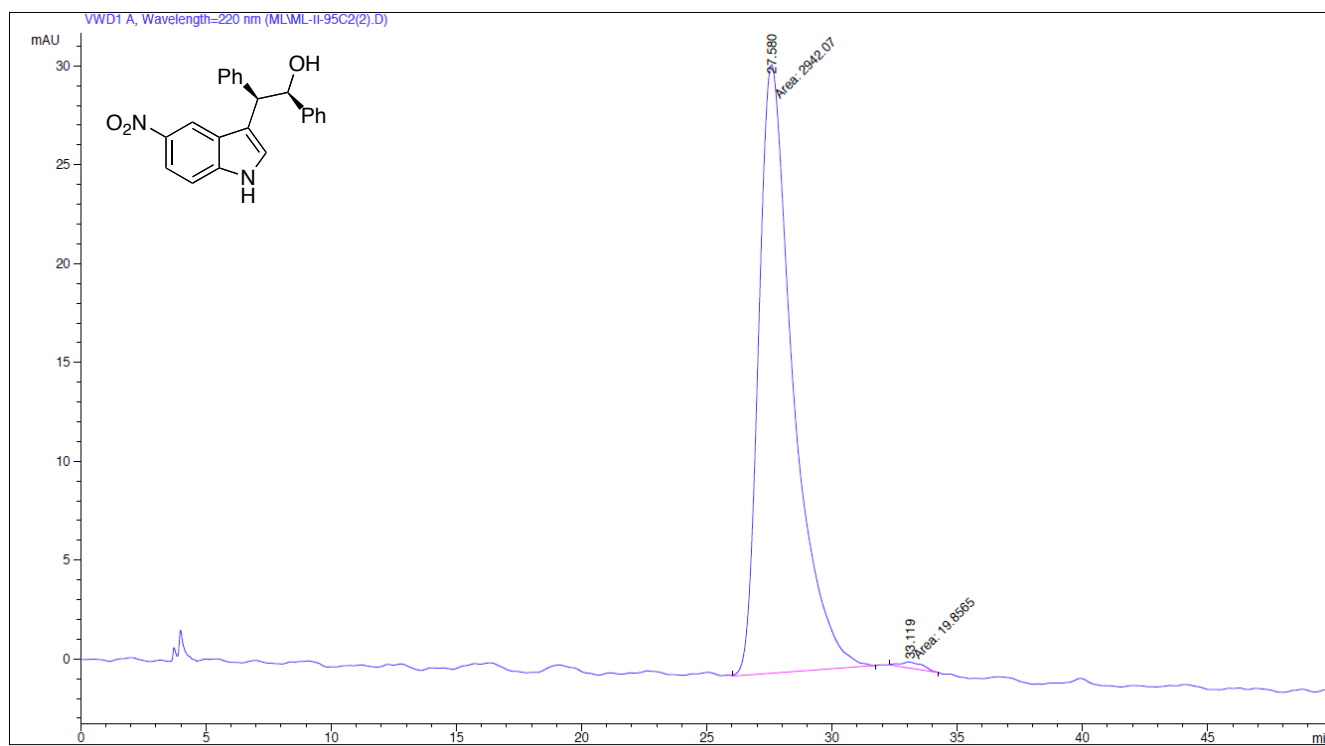

Signal 1: VWD1 A, Wavelength=220 nm

| Peak # | RetTime [min] | Type | Width [min] | Area mAU *s | Height [mAU] | Area %  |
|--------|---------------|------|-------------|-------------|--------------|---------|
| 1      | 27.580        | MM   | 1.5936      | 2942.07495  | 30.77010     | 99.3296 |
| 2      | 33.119        | MM   | 1.0728      | 19.85651    | 3.08493e-1   | 0.6704  |

Totals : 2961.93146 31.07859

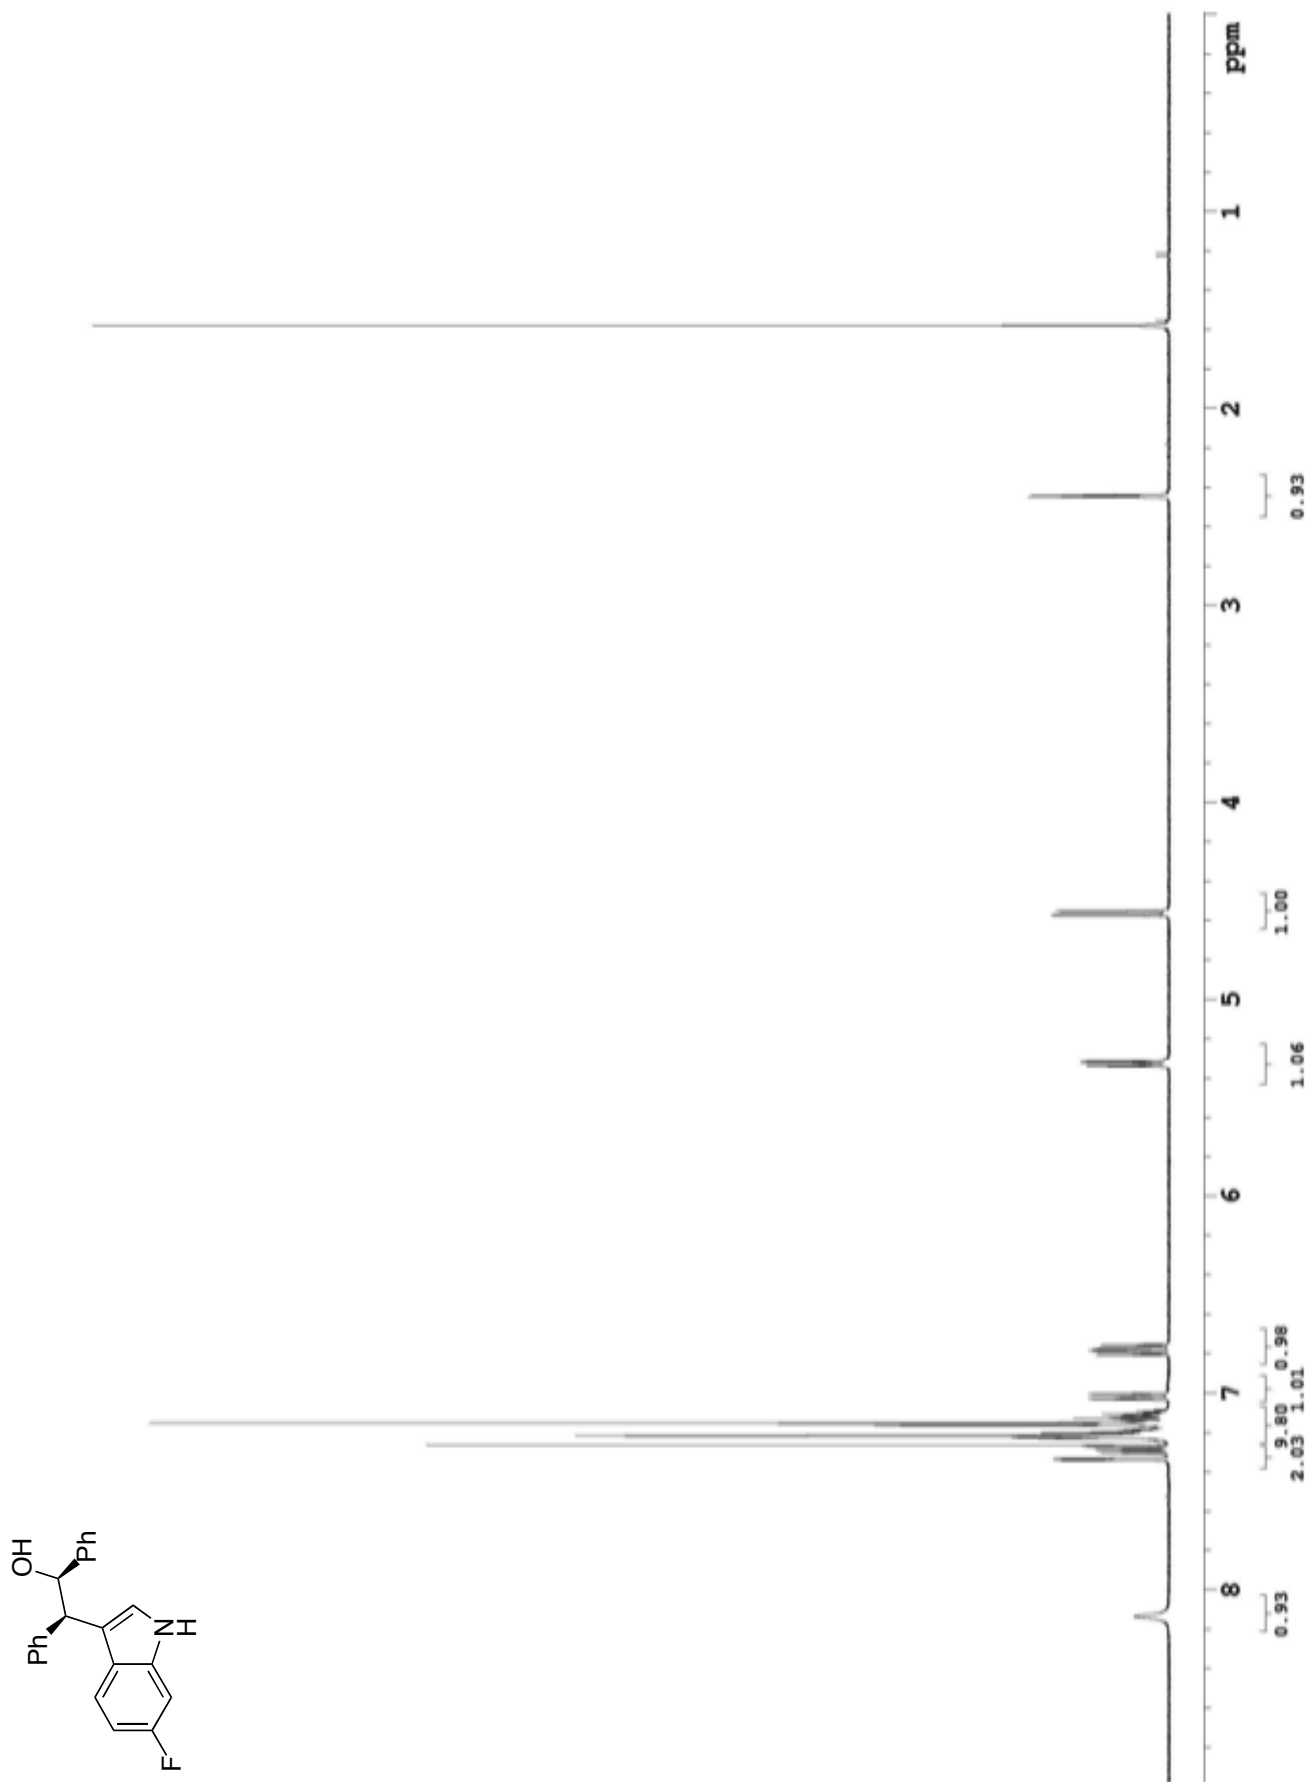



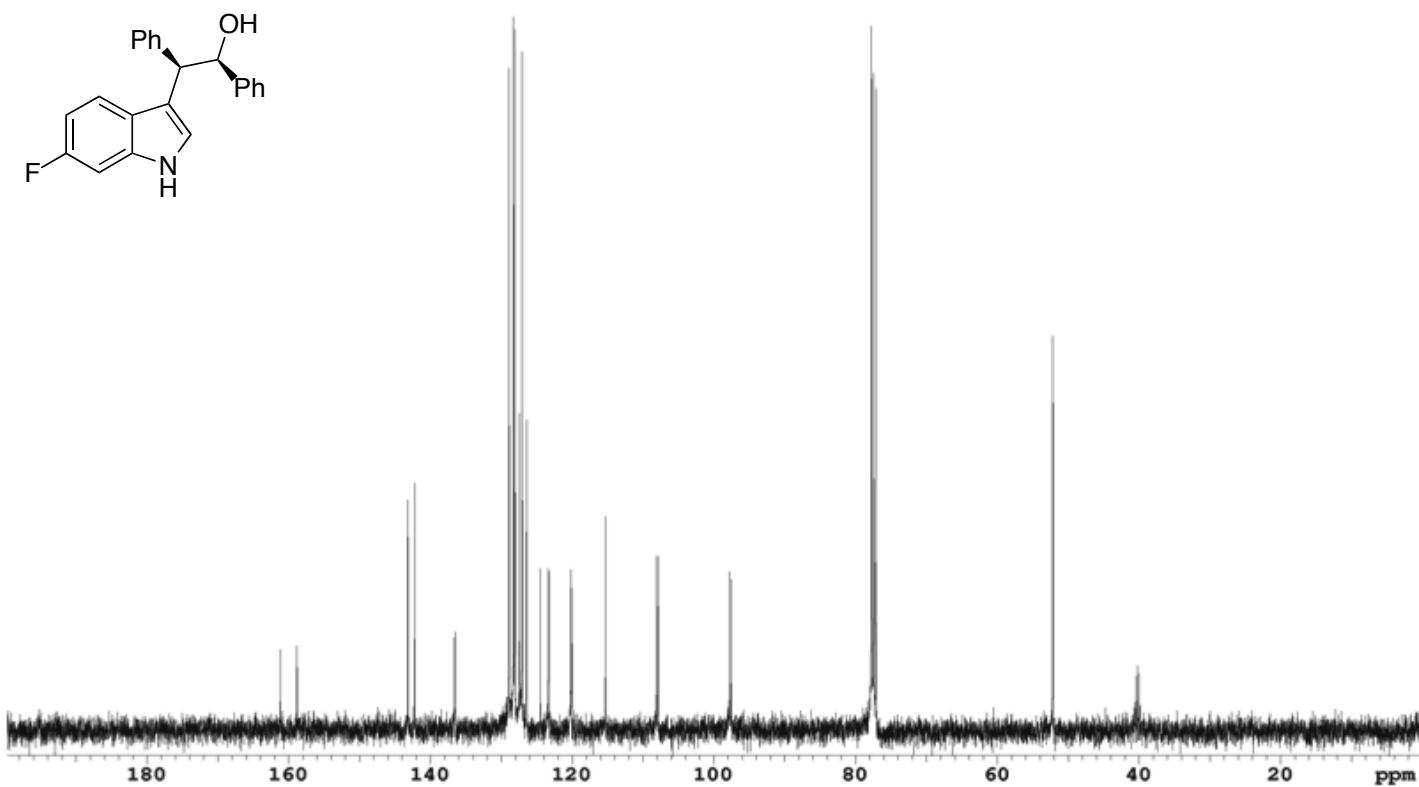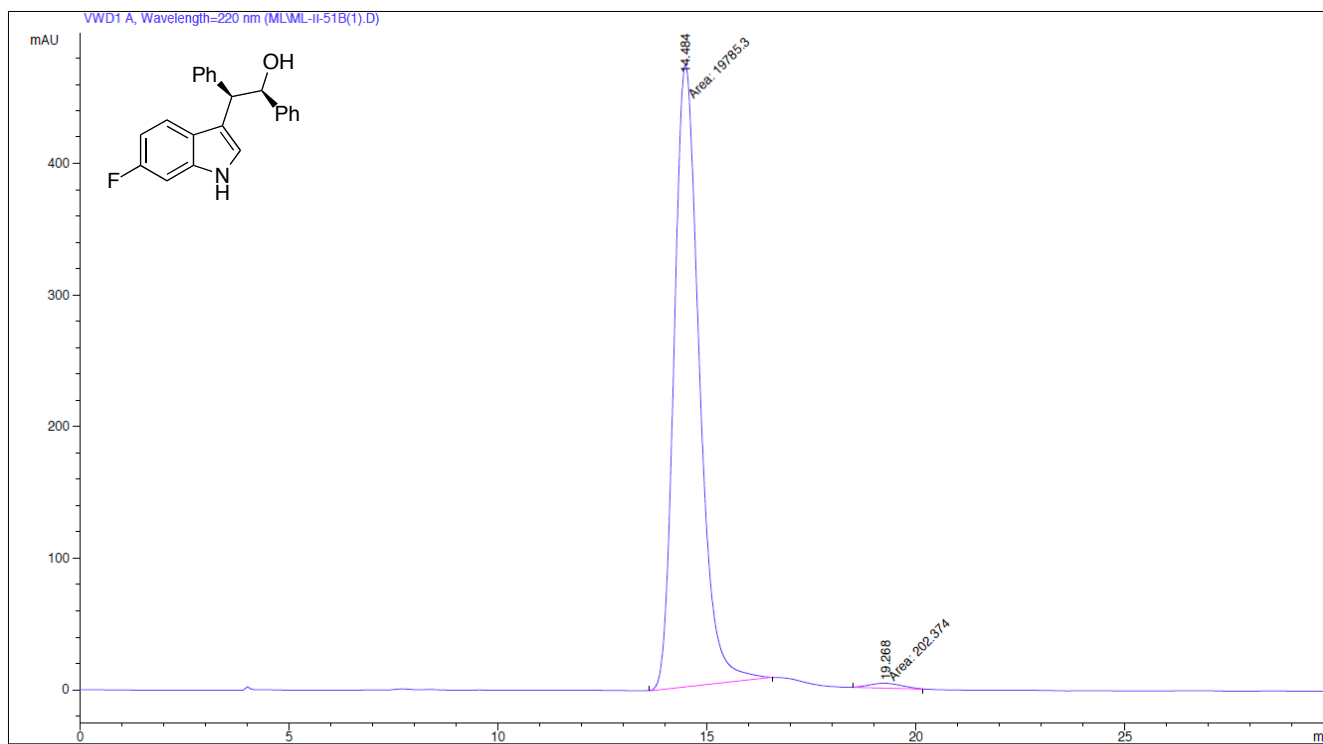

Signal 1: VWD1 A, Wavelength=220 nm

| Peak # | RetTime [min] | Type | Width [min] | Area mAU  | Area *s | Height [mAU] | Area %  |
|--------|---------------|------|-------------|-----------|---------|--------------|---------|
| 1      | 14.484        | MM   | 0.6974      | 1.97853e4 |         | 472.82312    | 98.9875 |
| 2      | 19.268        | MM   | 0.8963      | 202.37360 |         | 3.76299      | 1.0125  |

Totals : 1.99876e4 476.58611

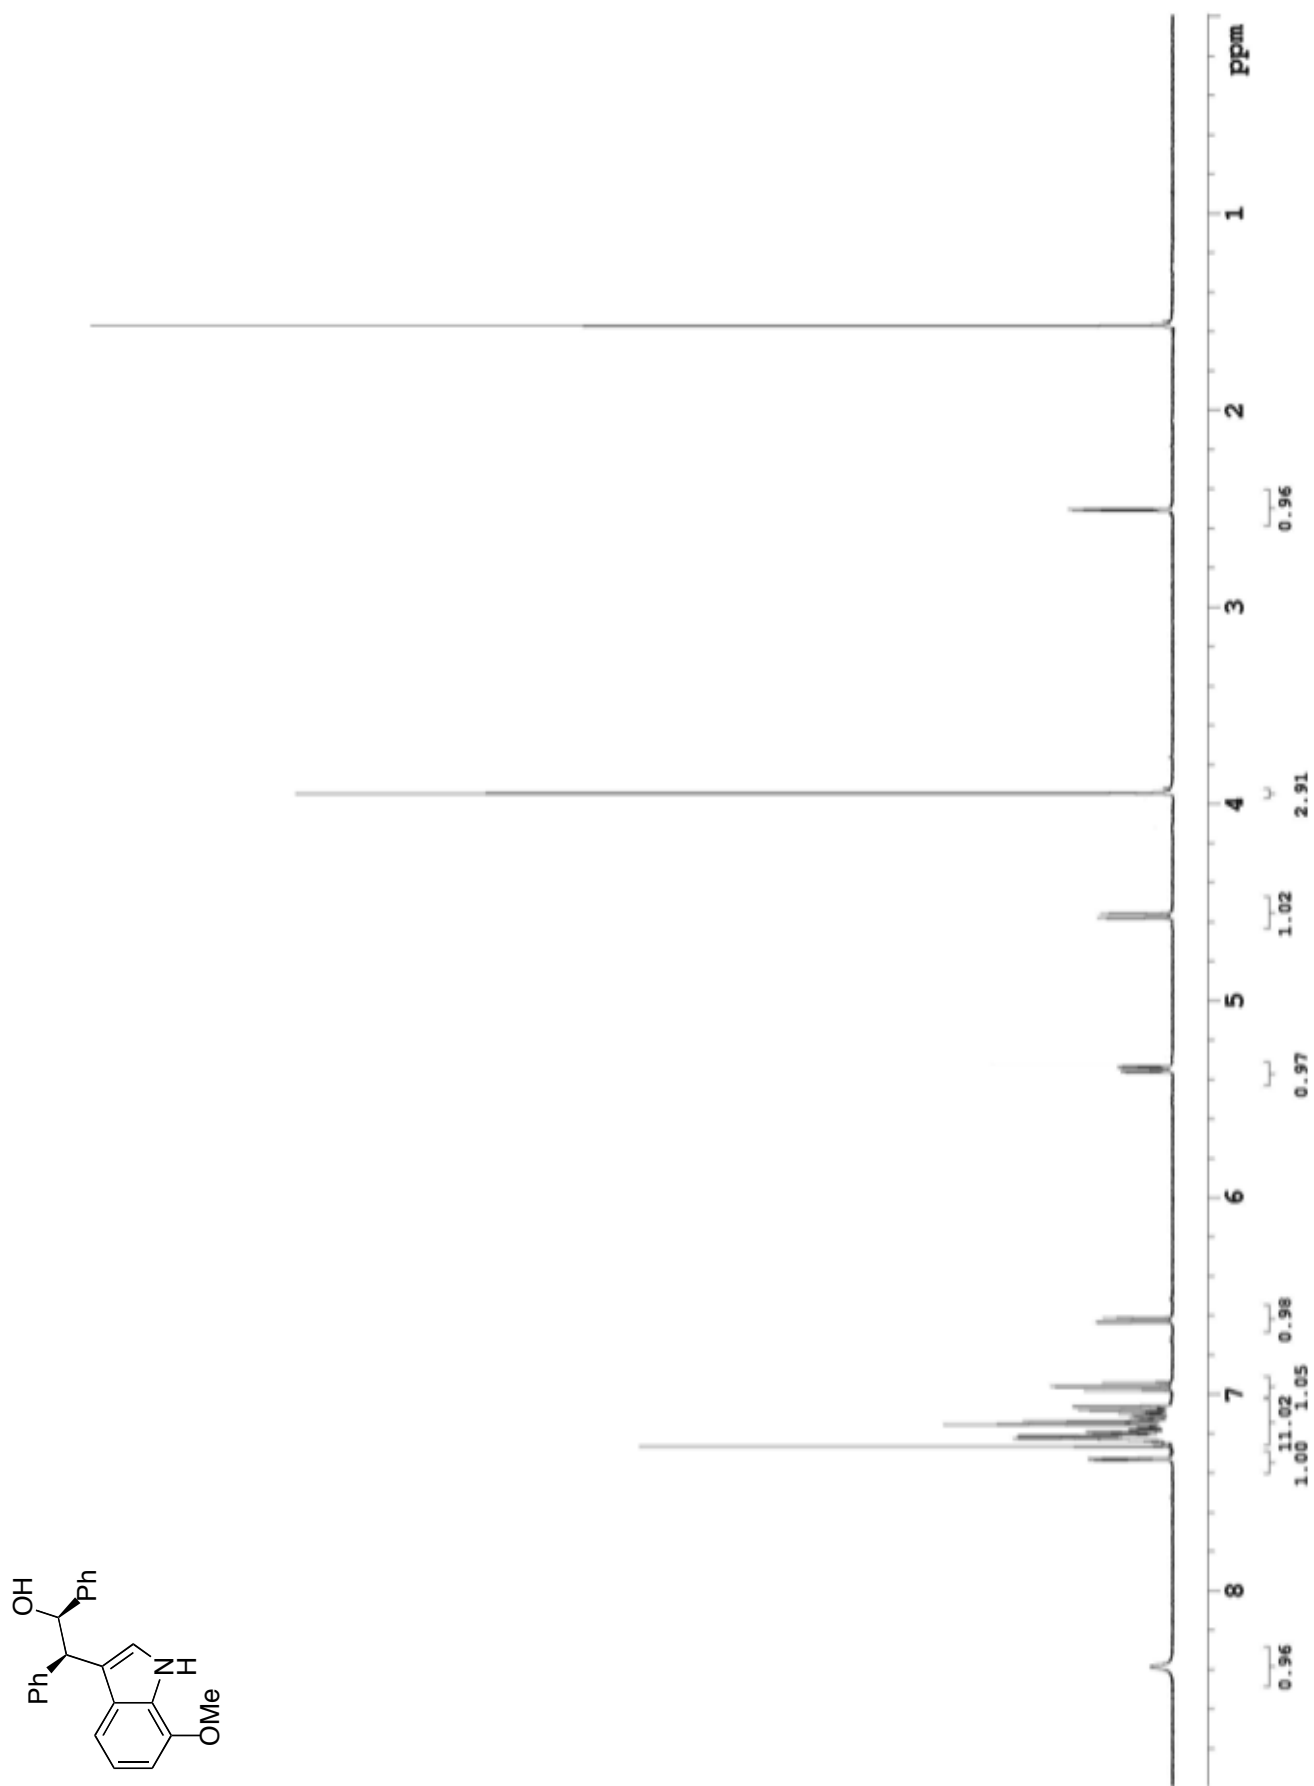

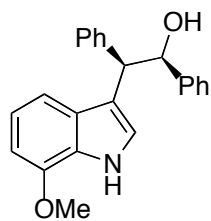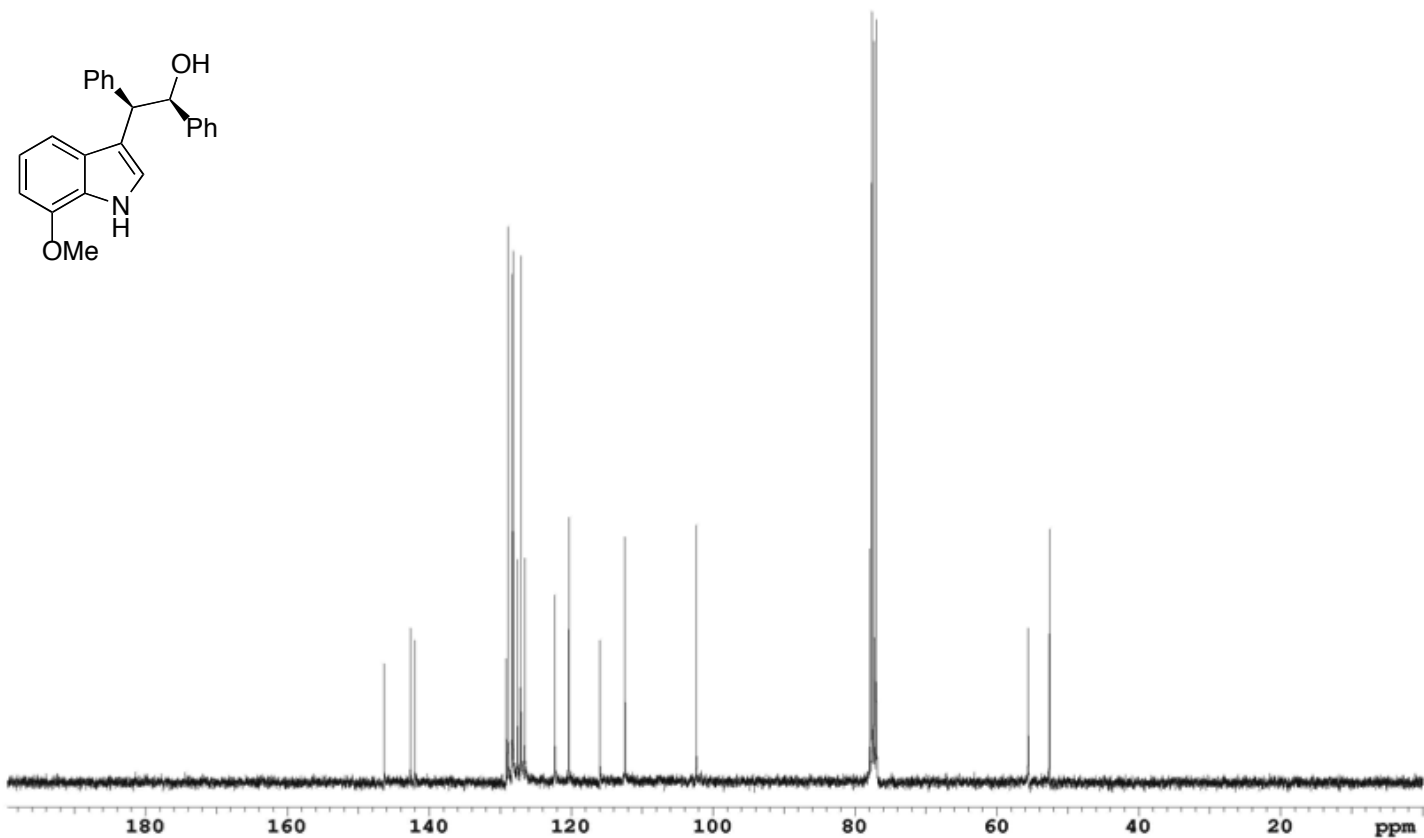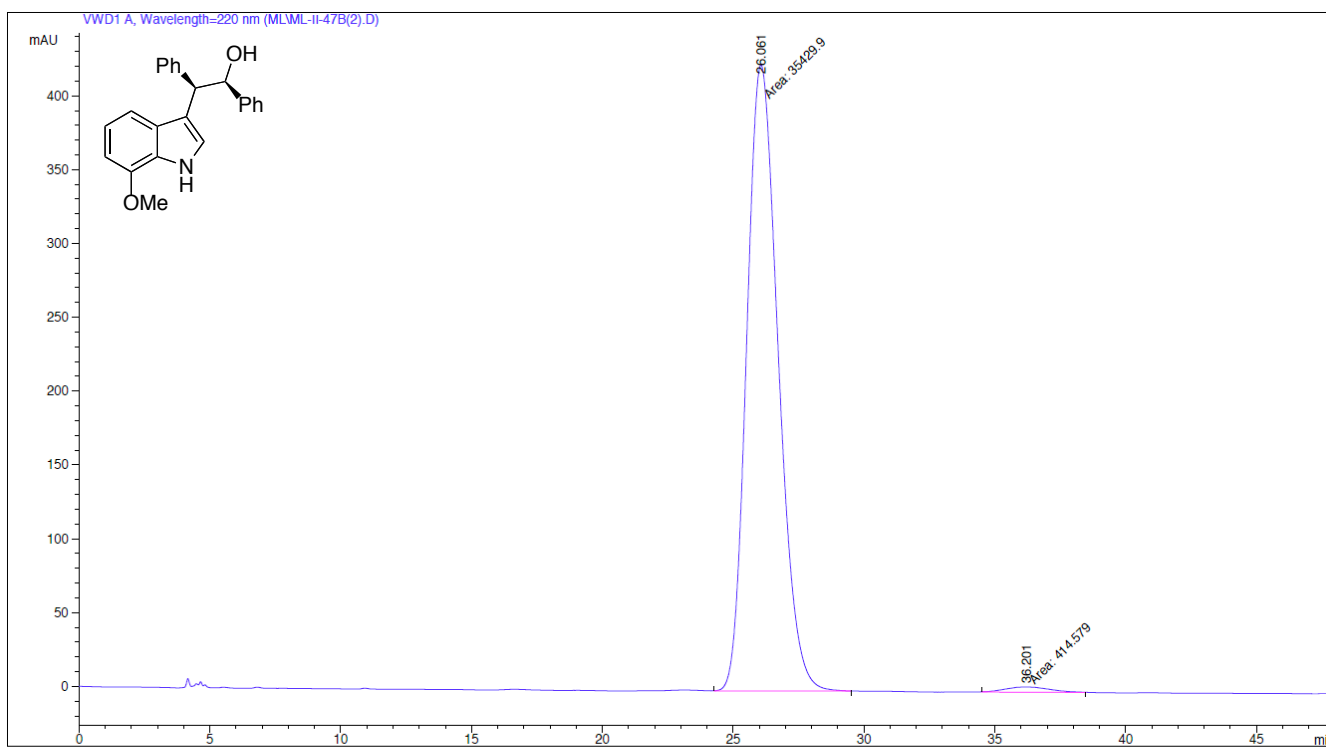

Signal 1: VWD1 A, Wavelength=220 nm

| Peak # | RetTime [min] | Type | Width [min] | Area mAU*s | Height [mAU] | Area %  |
|--------|---------------|------|-------------|------------|--------------|---------|
| 1      | 26.061        | MM   | 1.3927      | 3.54299e4  | 423.99191    | 98.8434 |
| 2      | 36.201        | MM   | 1.9314      | 414.57886  | 3.57753      | 1.1566  |

Totals : 3.58445e4 427.56944

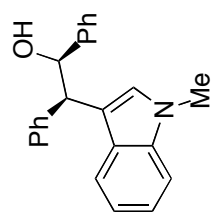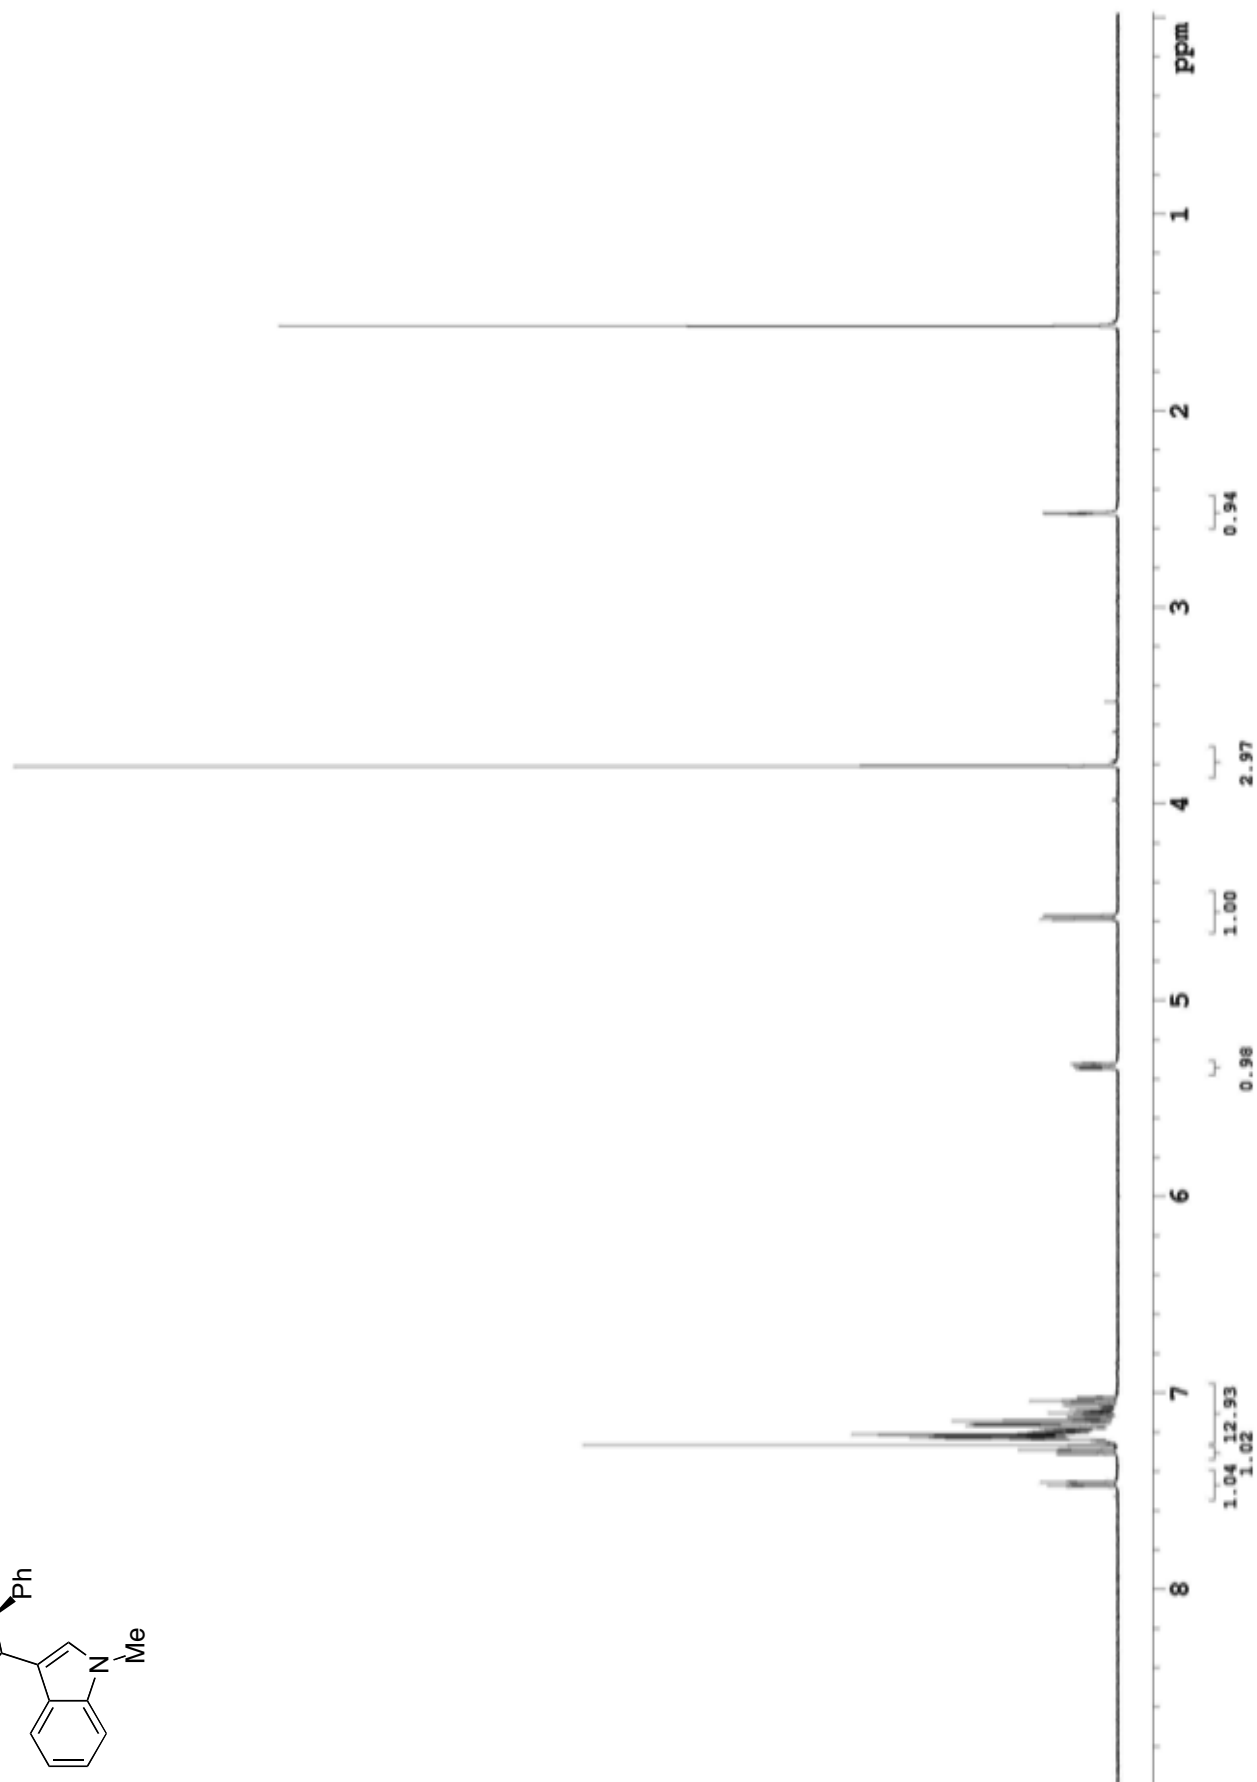

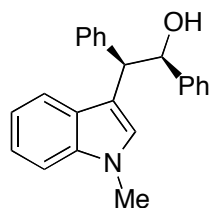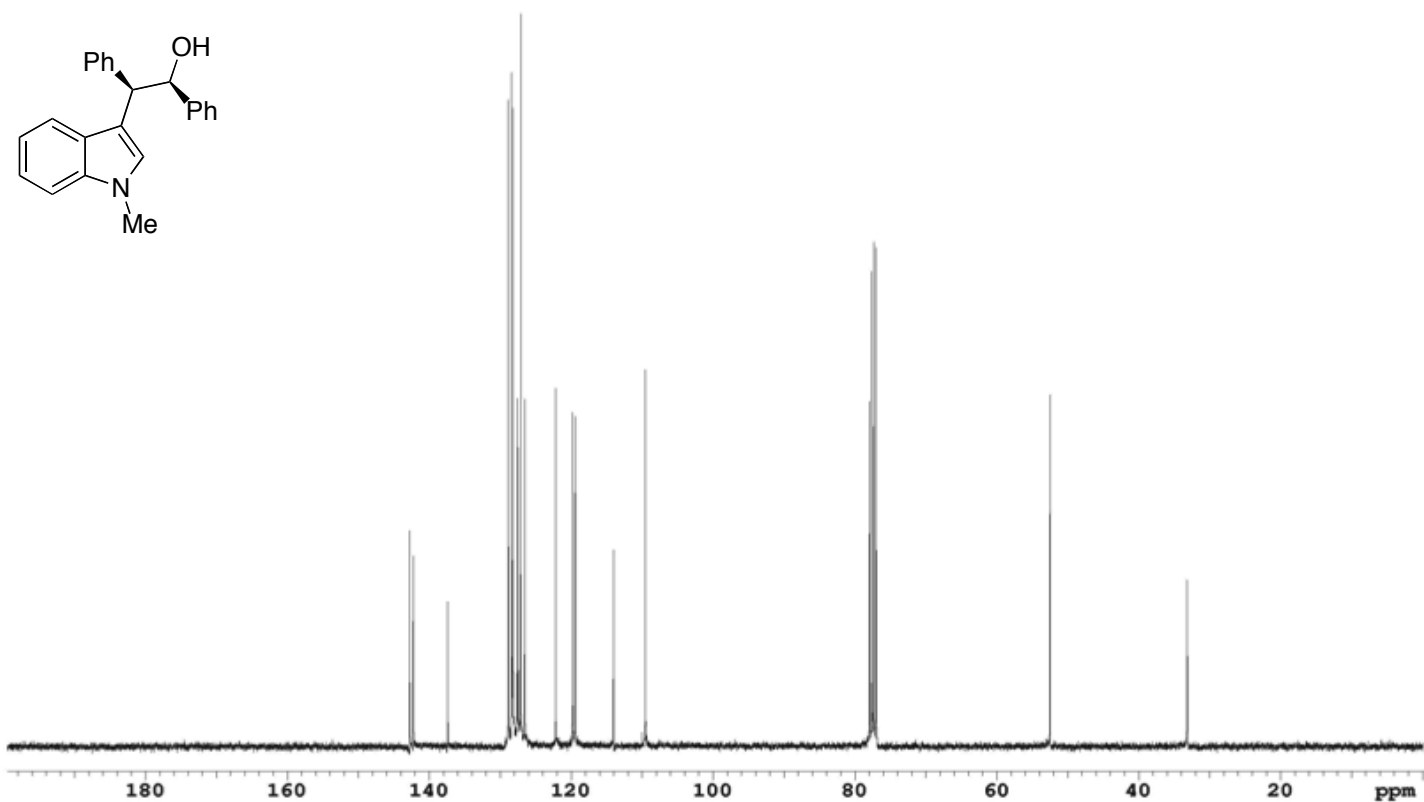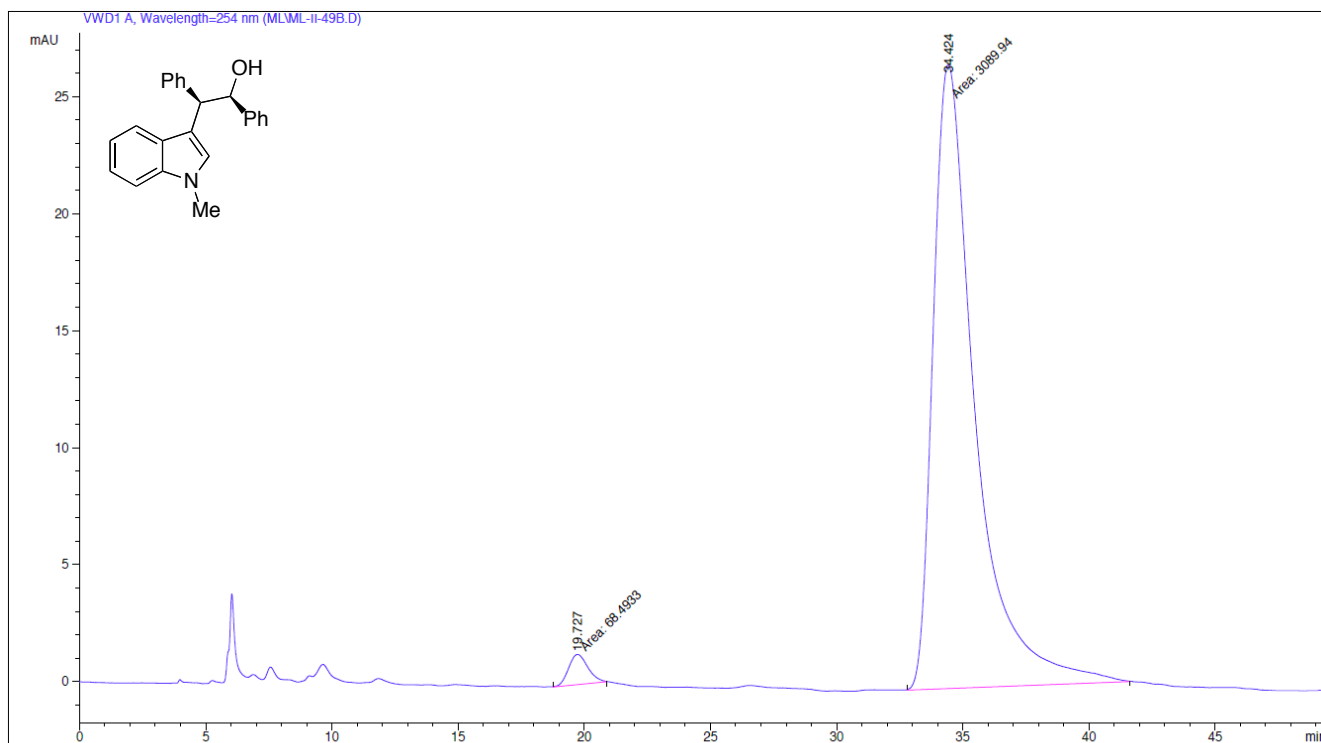

Signal 1: VWD1 A, Wavelength=254 nm

| Peak # | RetTime [min] | Type | Width [min] | Area mAU *s | Height [mAU] | Area %  |
|--------|---------------|------|-------------|-------------|--------------|---------|
| 1      | 19.727        | MM   | 0.8847      | 68.49332    | 1.29027      | 2.1686  |
| 2      | 34.424        | MM   | 1.9315      | 3089.93921  | 26.66301     | 97.8314 |

Totals : 3158.43253 27.95328

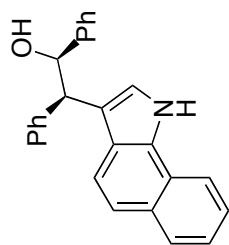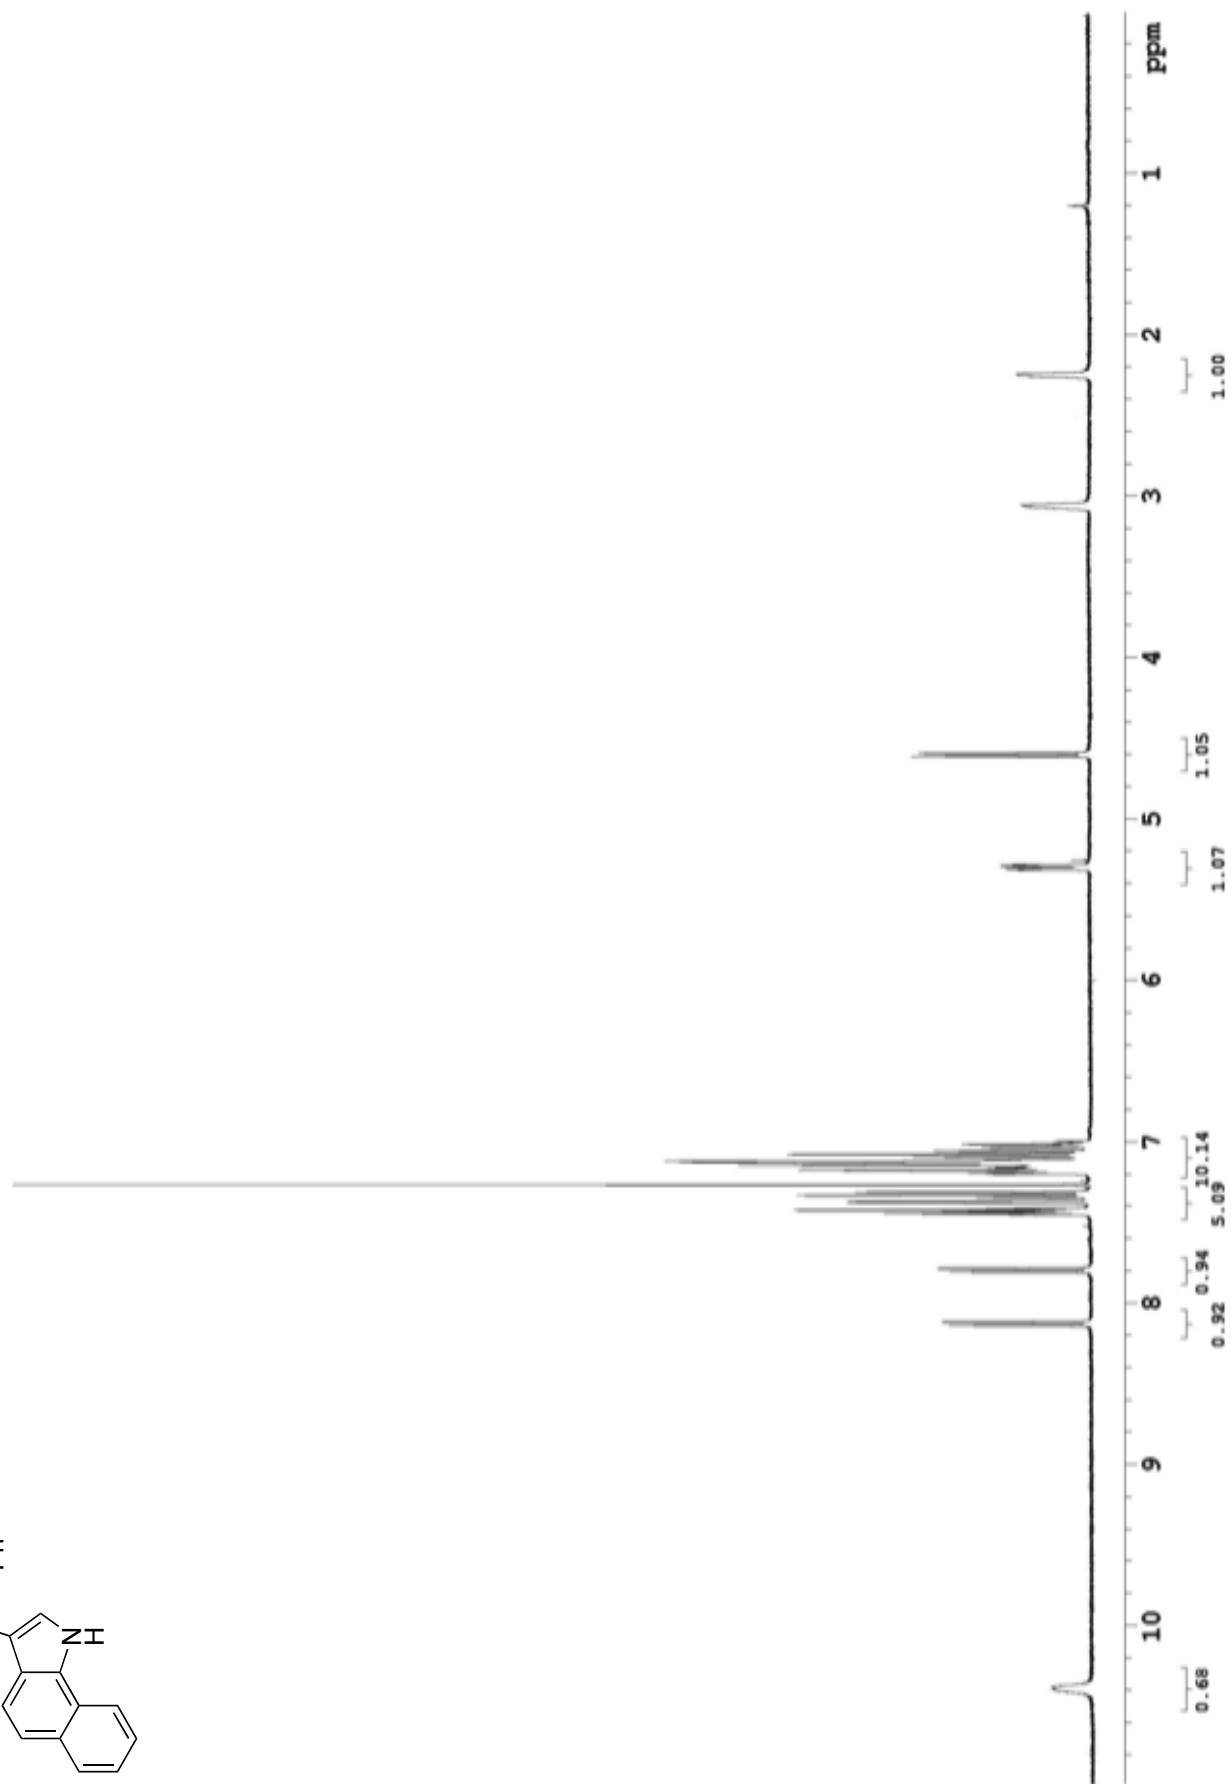

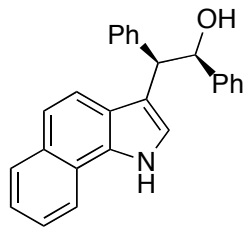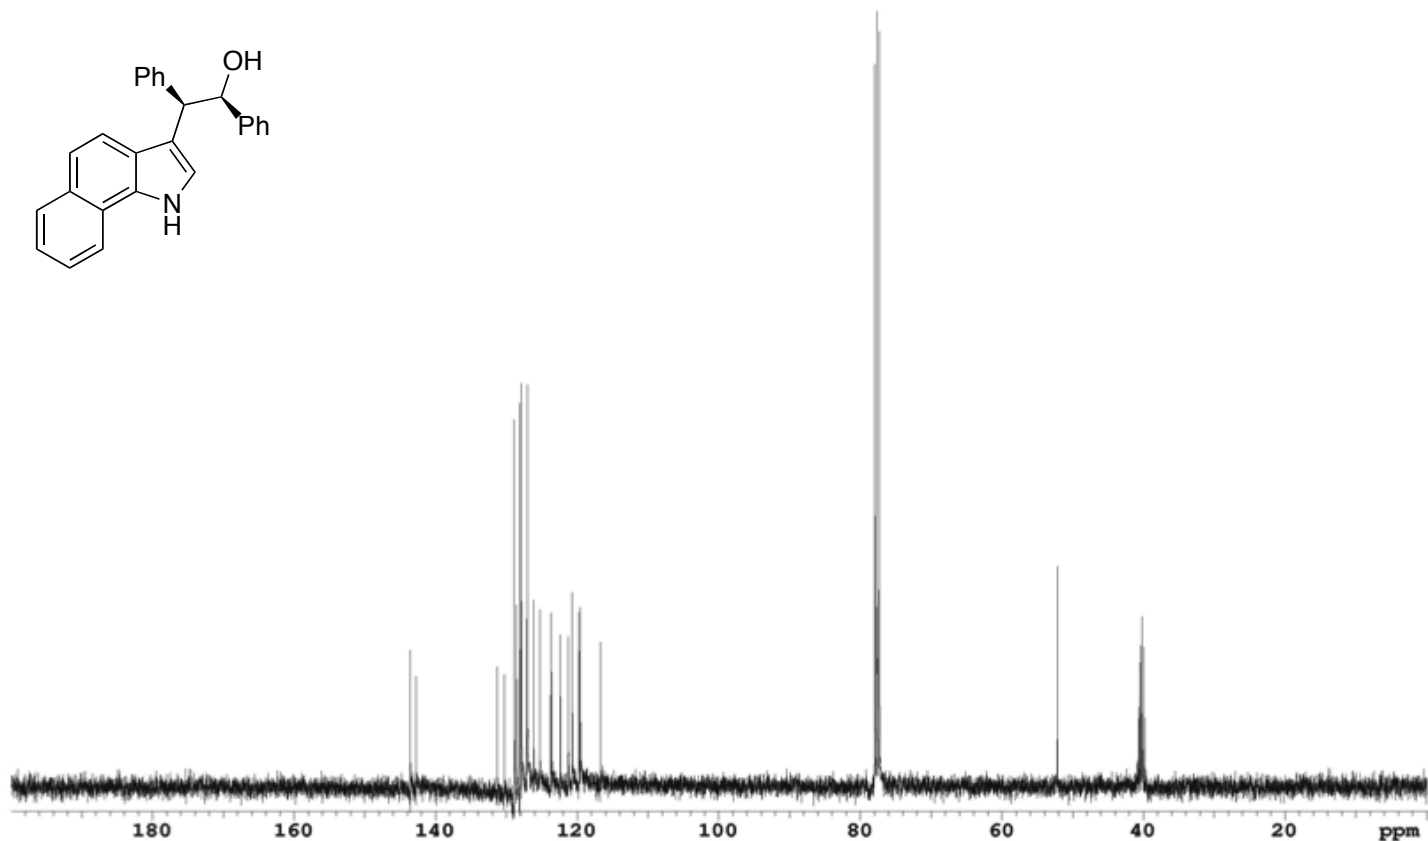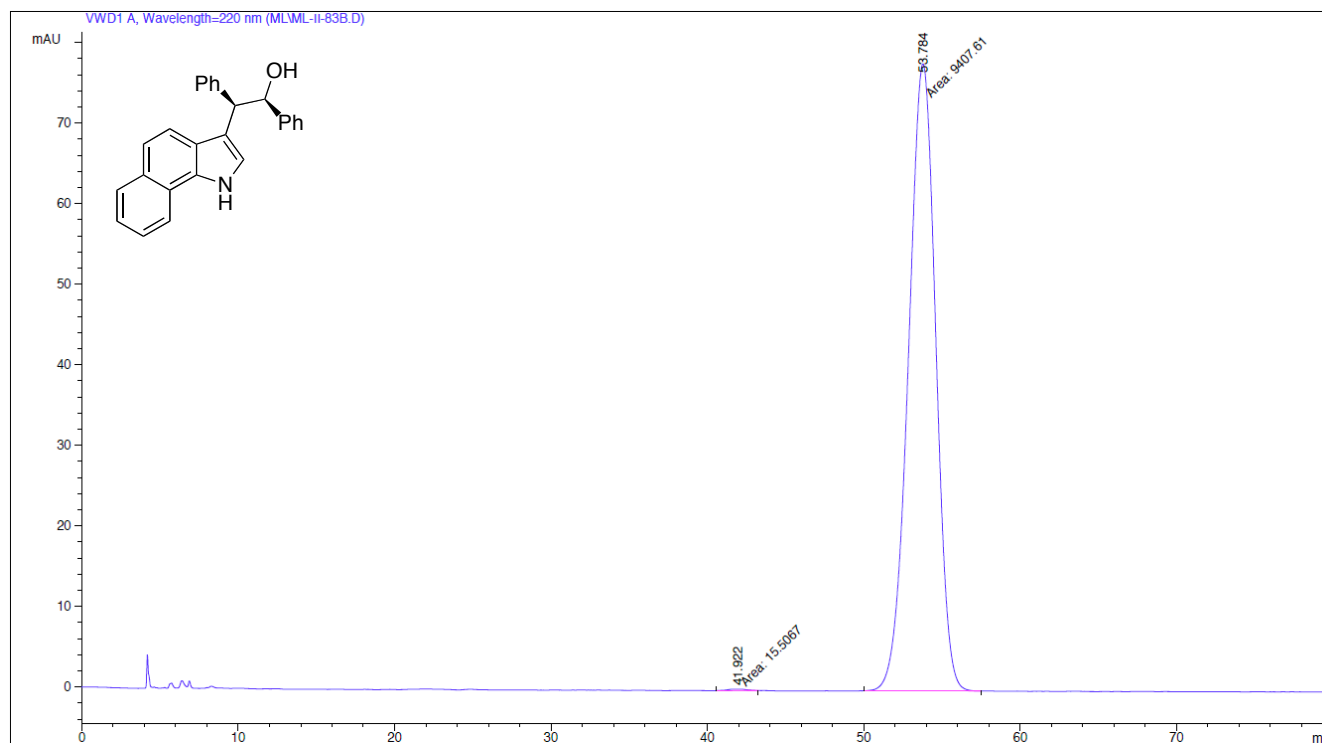

Signal 1: VWD1 A, Wavelength=220 nm

| Peak # | RetTime [min] | Type | Width [min] | Area mAU *s | Height [mAU] | Area %  |
|--------|---------------|------|-------------|-------------|--------------|---------|
| 1      | 41.922        | MM   | 1.3514      | 15.50669    | 1.91244e-1   | 0.1646  |
| 2      | 53.784        | MM   | 2.0151      | 9407.61230  | 77.80868     | 99.8354 |

Totals : 9423.11900 77.99992



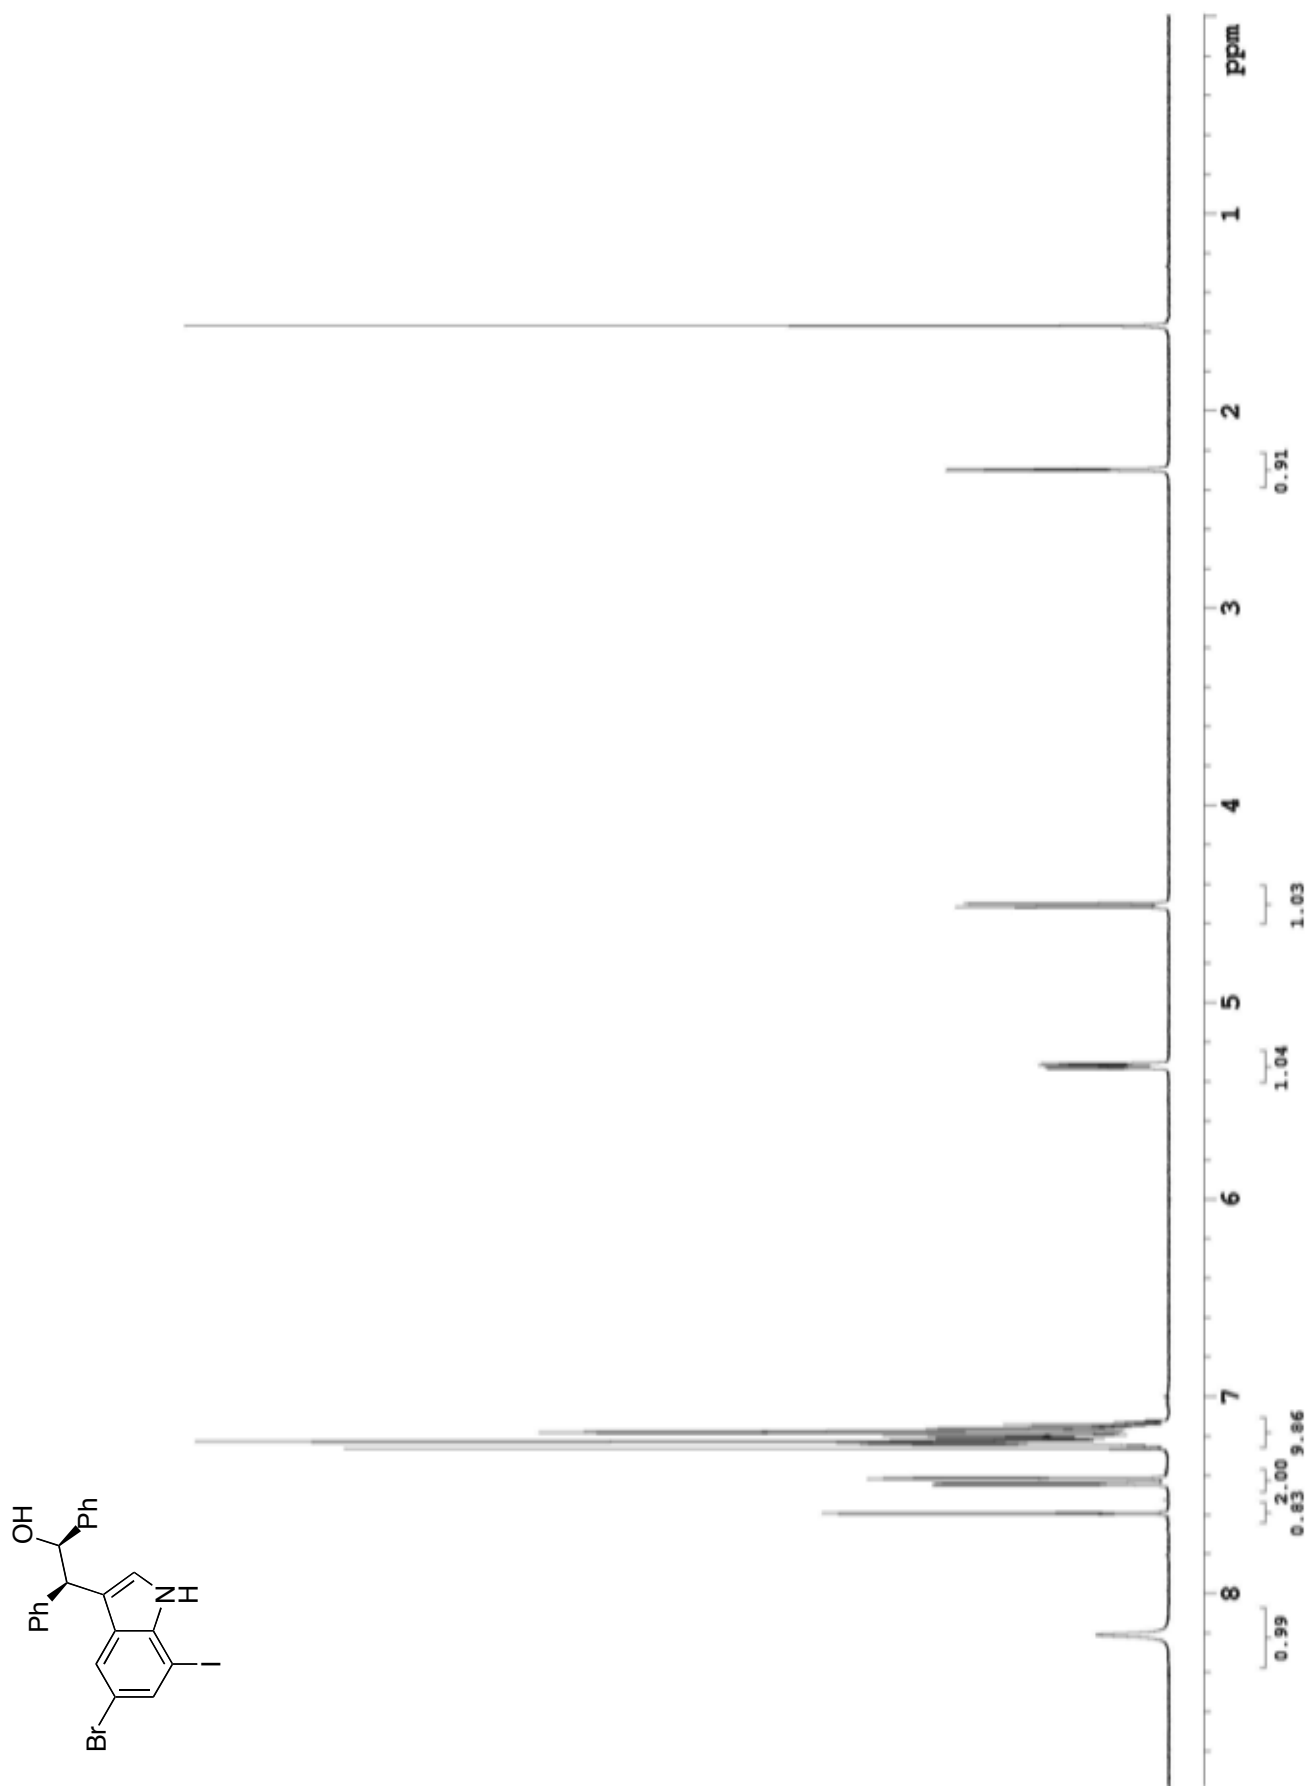

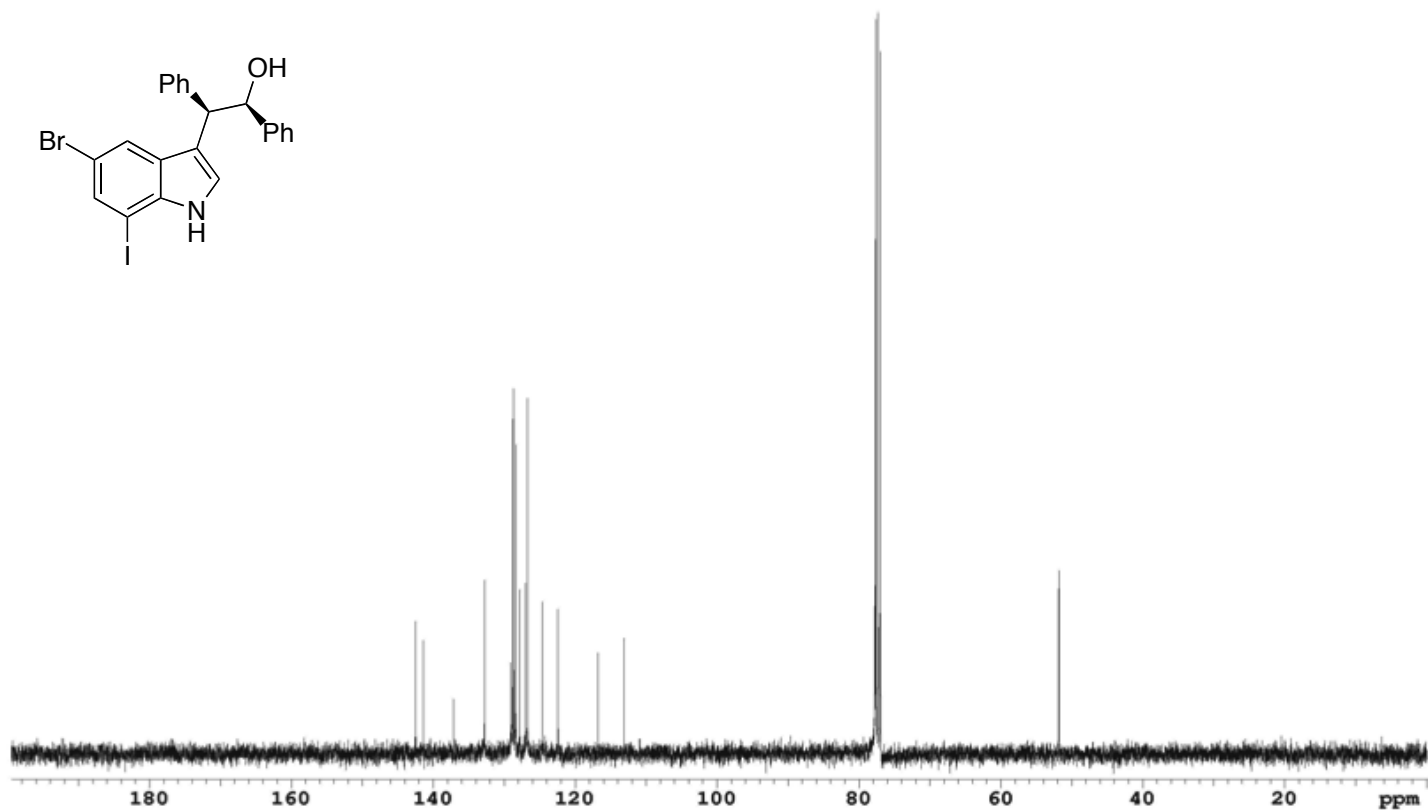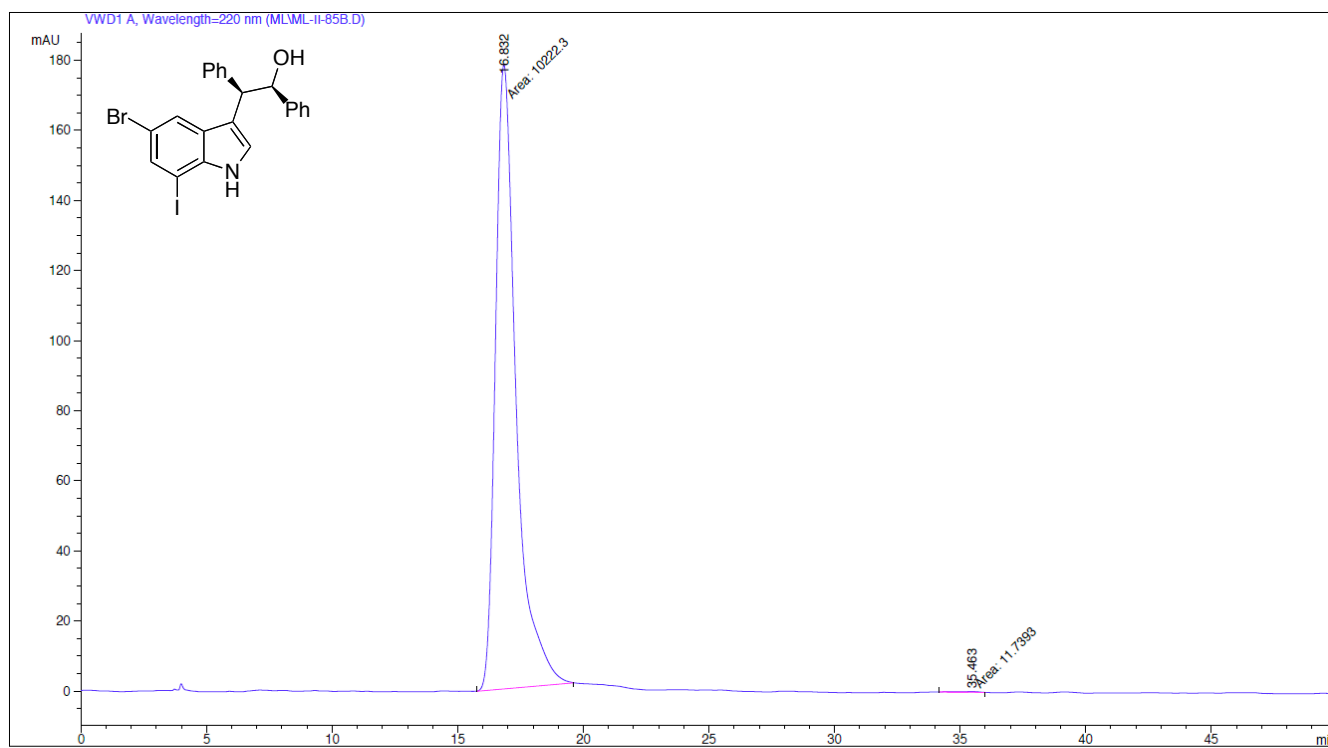

Signal 1: VWD1 A, Wavelength=220 nm

| Peak # | RetTime [min] | Type | Width [min] | Area mAU  | Area *s    | Height [mAU] | Area %  |
|--------|---------------|------|-------------|-----------|------------|--------------|---------|
| 1      | 16.832        | MM   | 0.9568      | 1.02223e4 | 178.05617  | 178.05617    | 99.8853 |
| 2      | 35.463        | MM   | 0.8209      | 11.73933  | 2.38329e-1 | 2.38329e-1   | 0.1147  |

Totals : 1.02341e4 178.29450

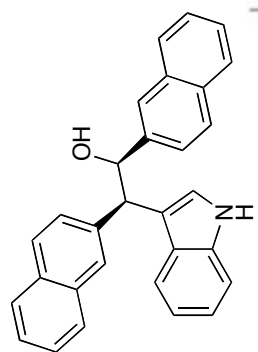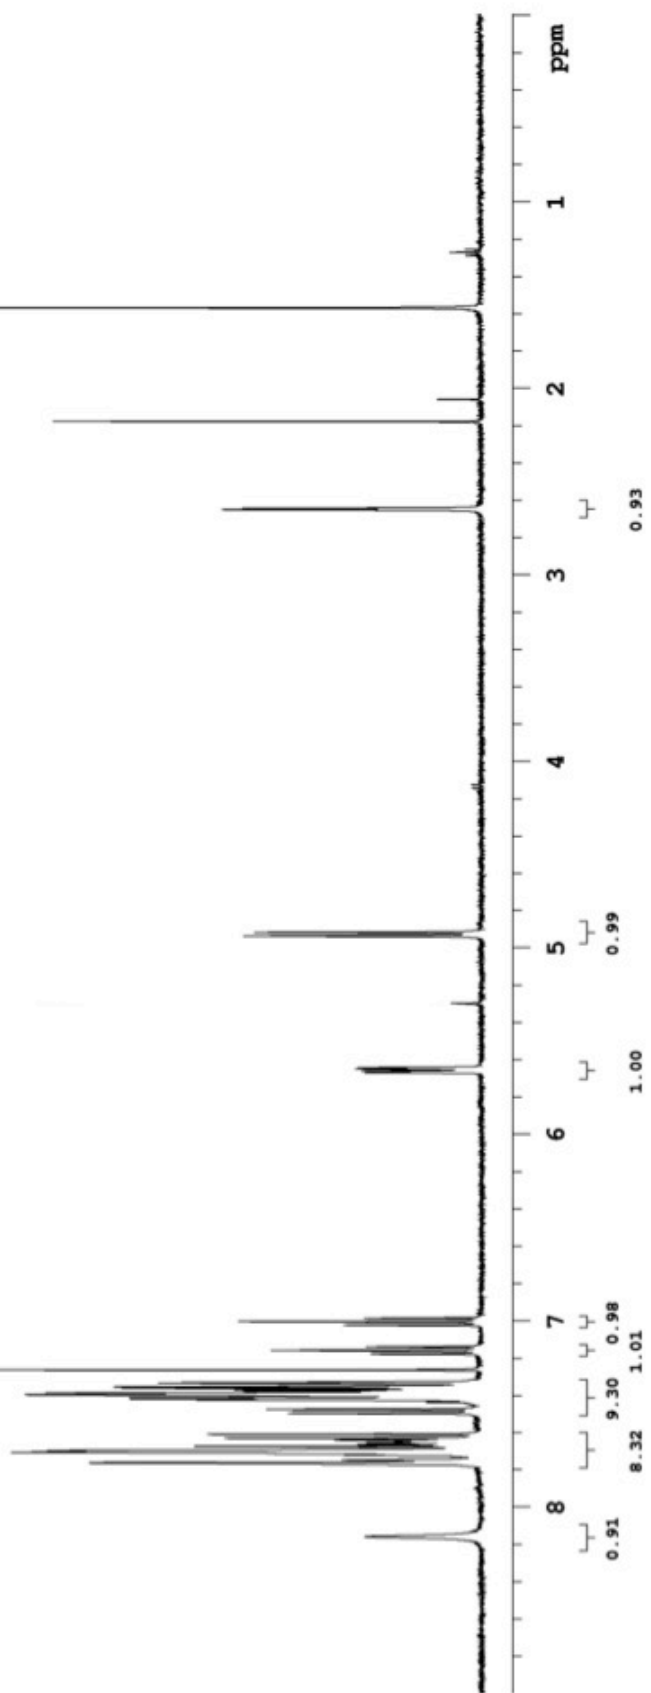

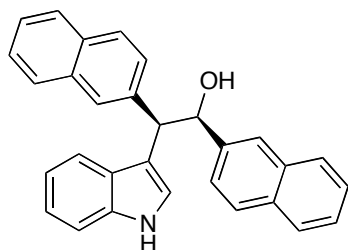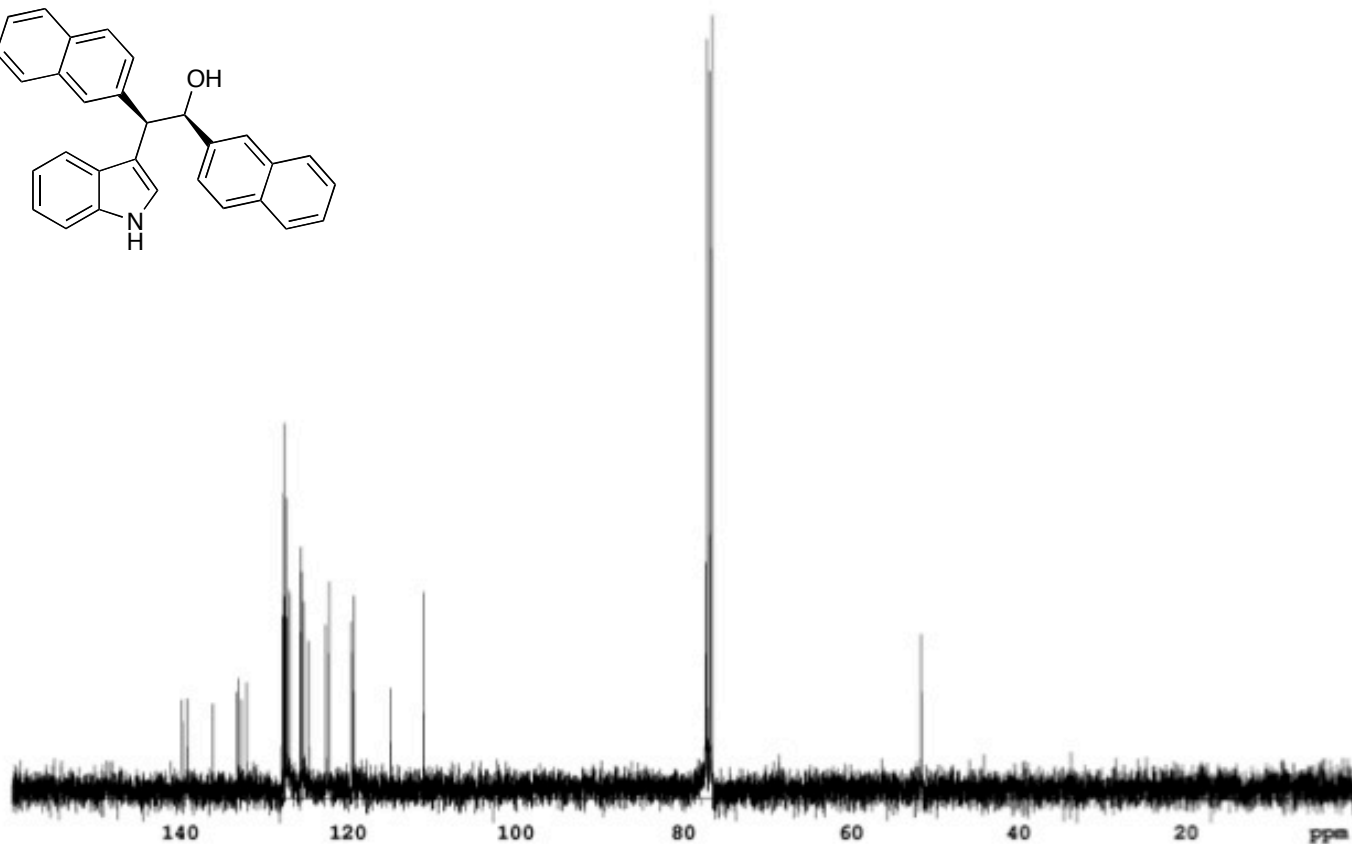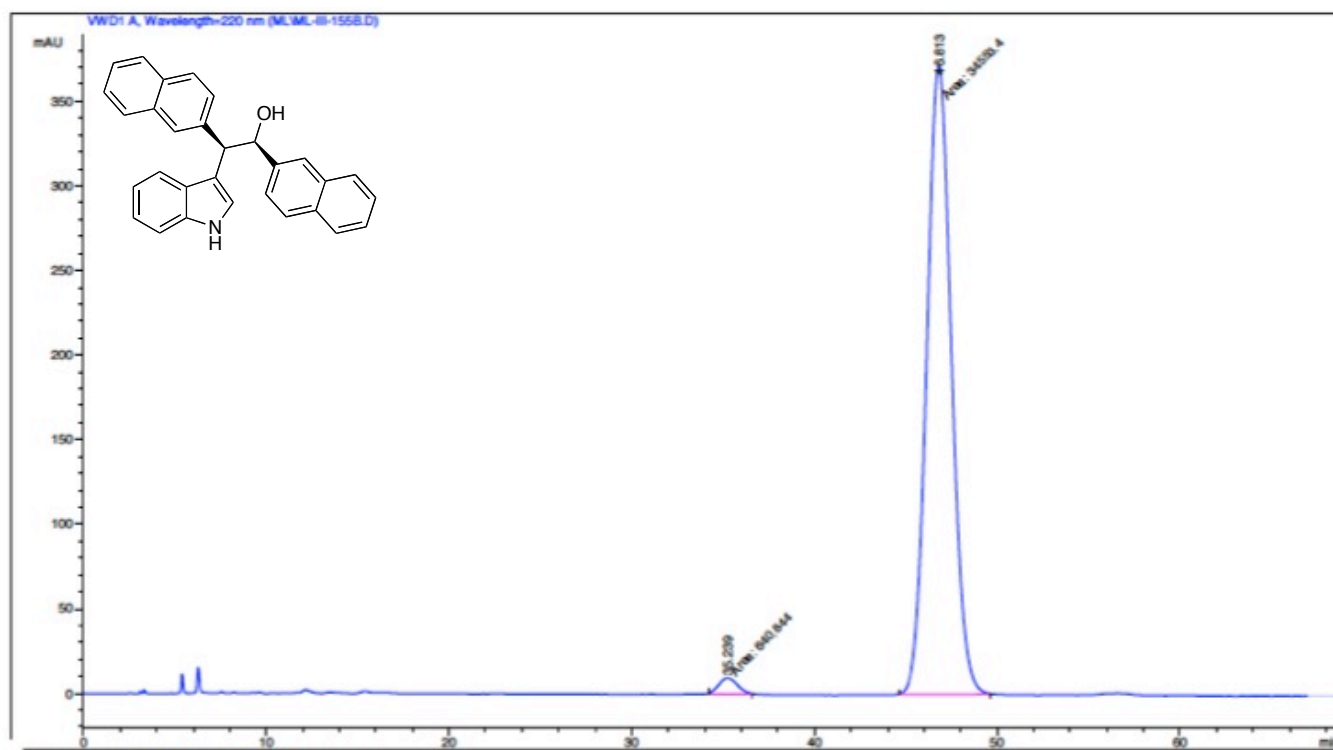

Signal 1: VWD1 A, Wavelength=220 nm

| Peak # | RetTime [min] | Type | Width [min] | Area mAU*s | Height [mAU] | Area %  |
|--------|---------------|------|-------------|------------|--------------|---------|
| 1      | 35.239        | MM   | 1.1556      | 640.84351  | 9.24266      | 1.8209  |
| 2      | 46.813        | MM   | 1.5507      | 3.45534e4  | 371.38165    | 98.1791 |

Totals : 3.51943e4 380.62431

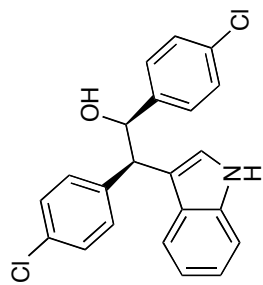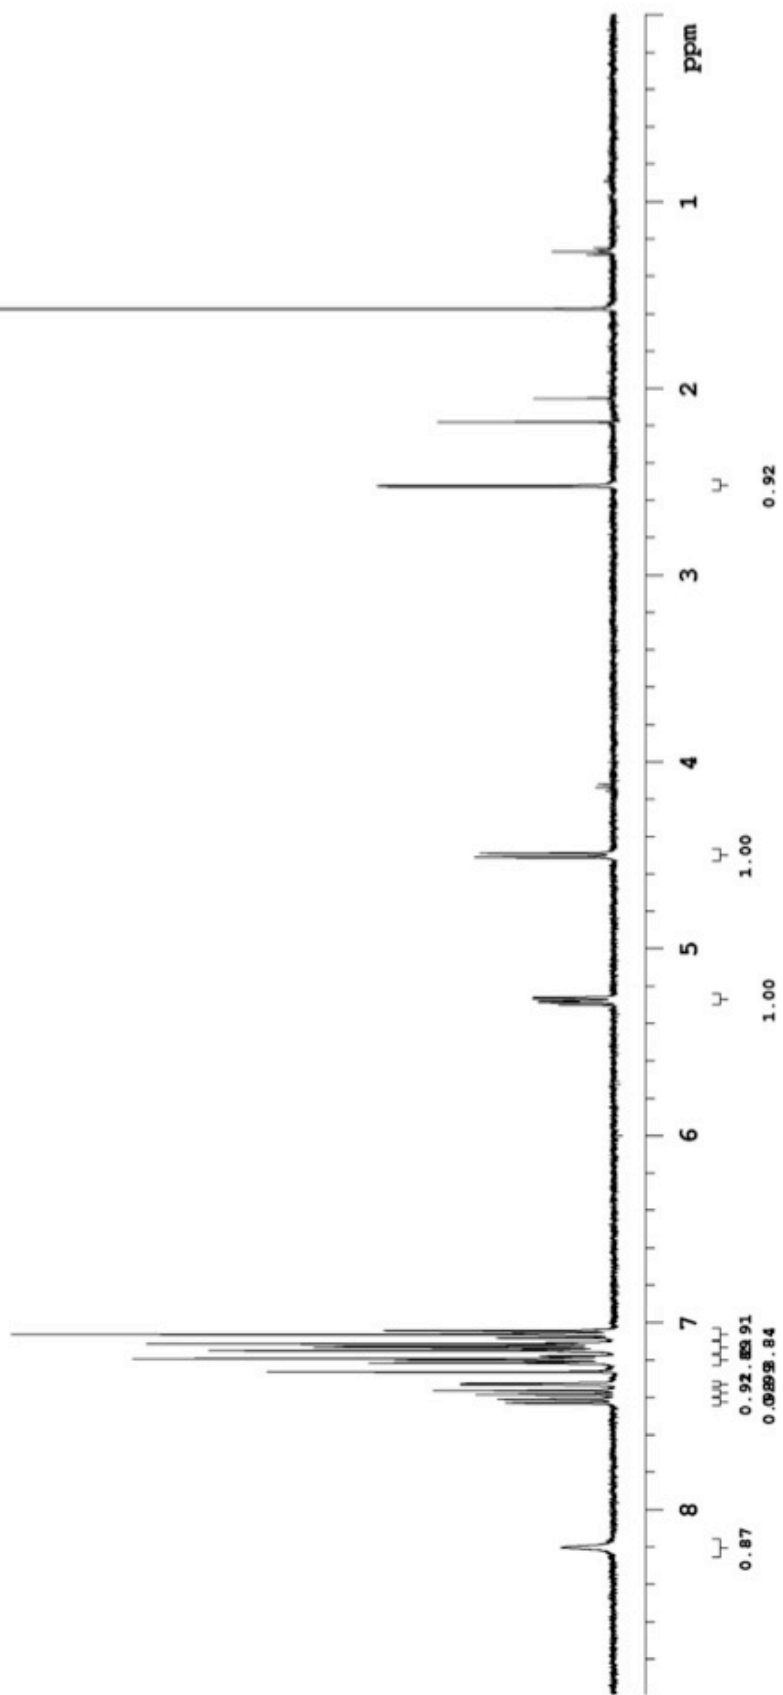

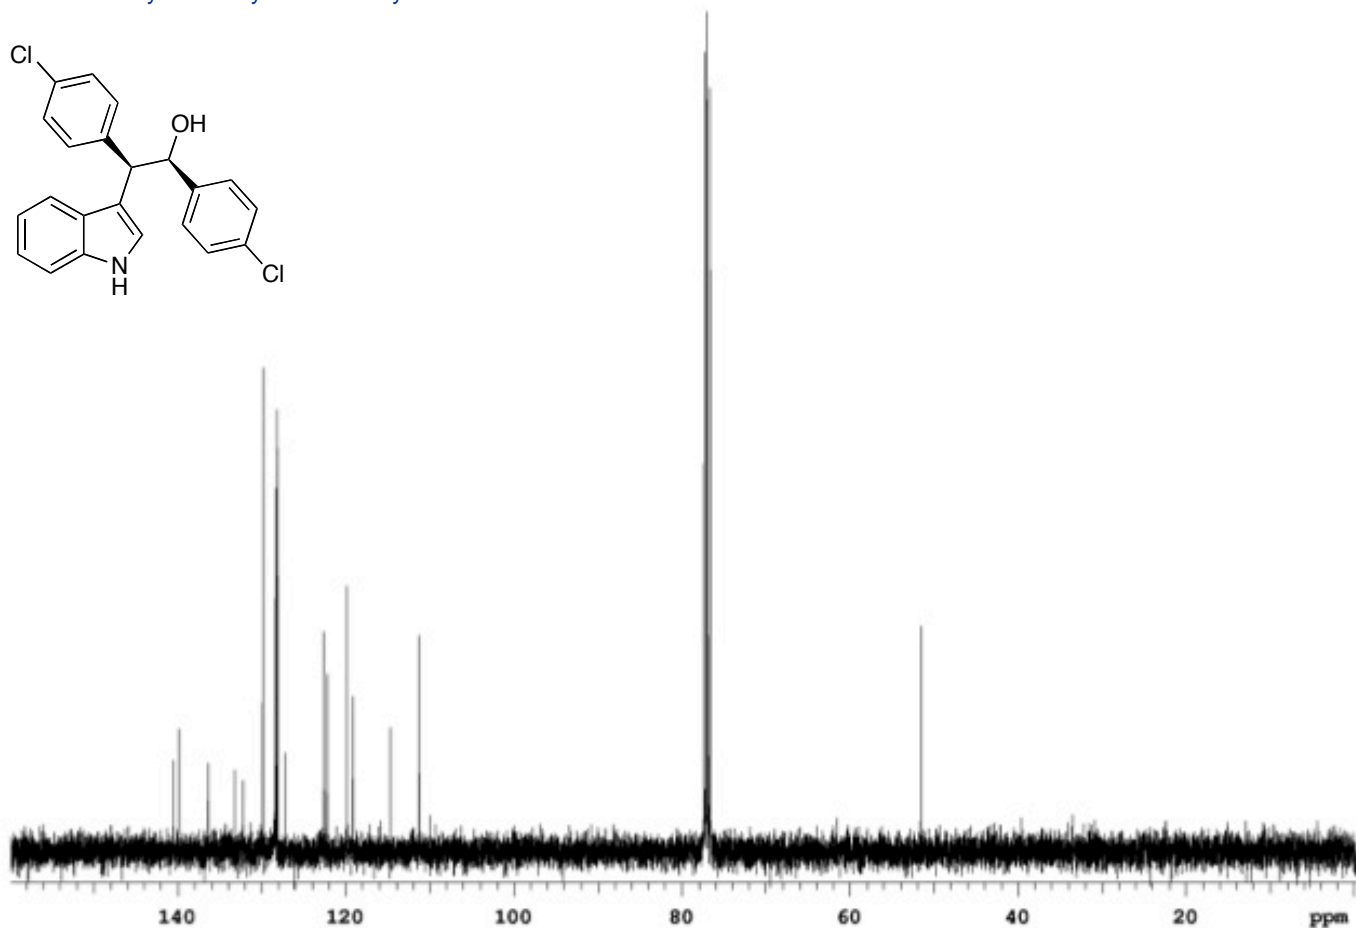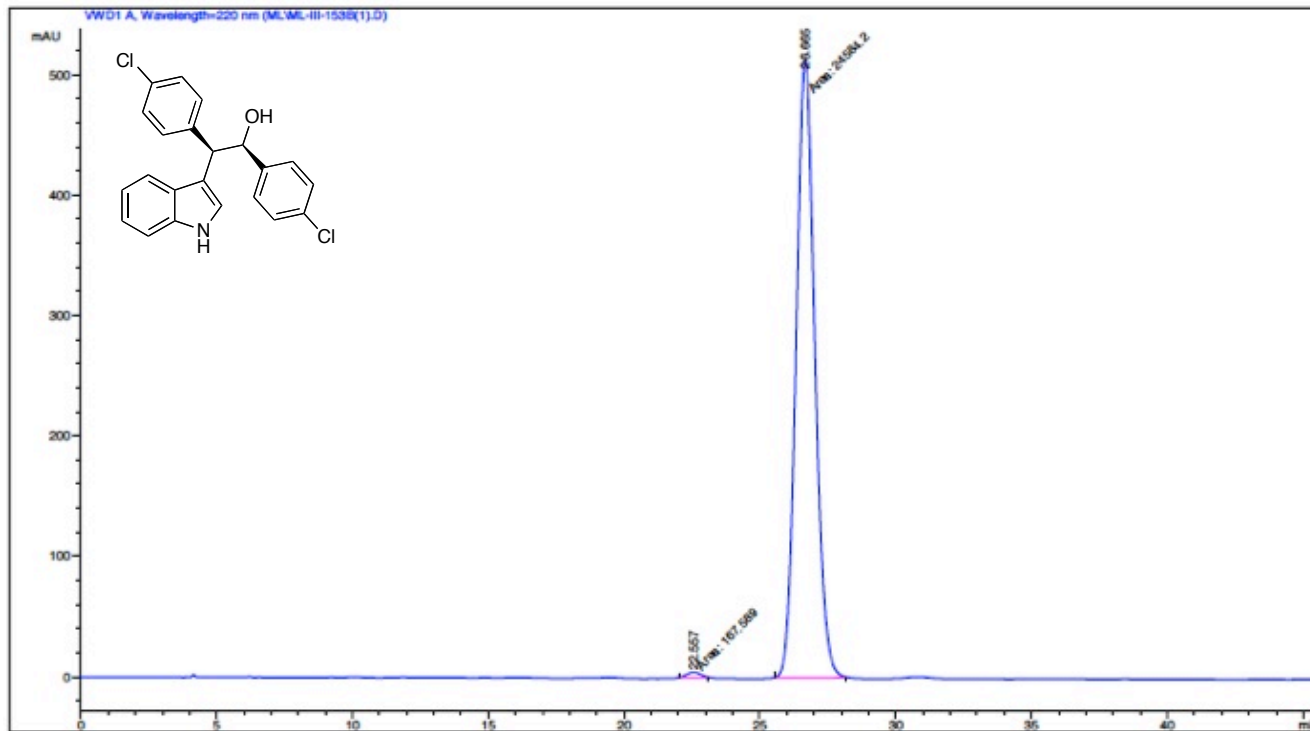

Signal 1: WVD1 A, Wavelength=220 nm

| Peak #   | RetTime [min] | Type | Width [min] | Area mAU  | Height [mAU] | Area %  |
|----------|---------------|------|-------------|-----------|--------------|---------|
| 1        | 22.557        | MM   | 0.6205      | 167.58907 | 4.50122      | 0.6771  |
| 2        | 26.665        | MM   | 0.7987      | 2.45842e4 | 513.02307    | 99.3229 |
| Totals : |               |      |             | 2.47518e4 | 517.52429    |         |

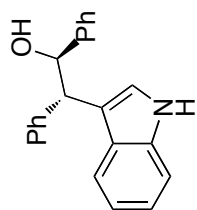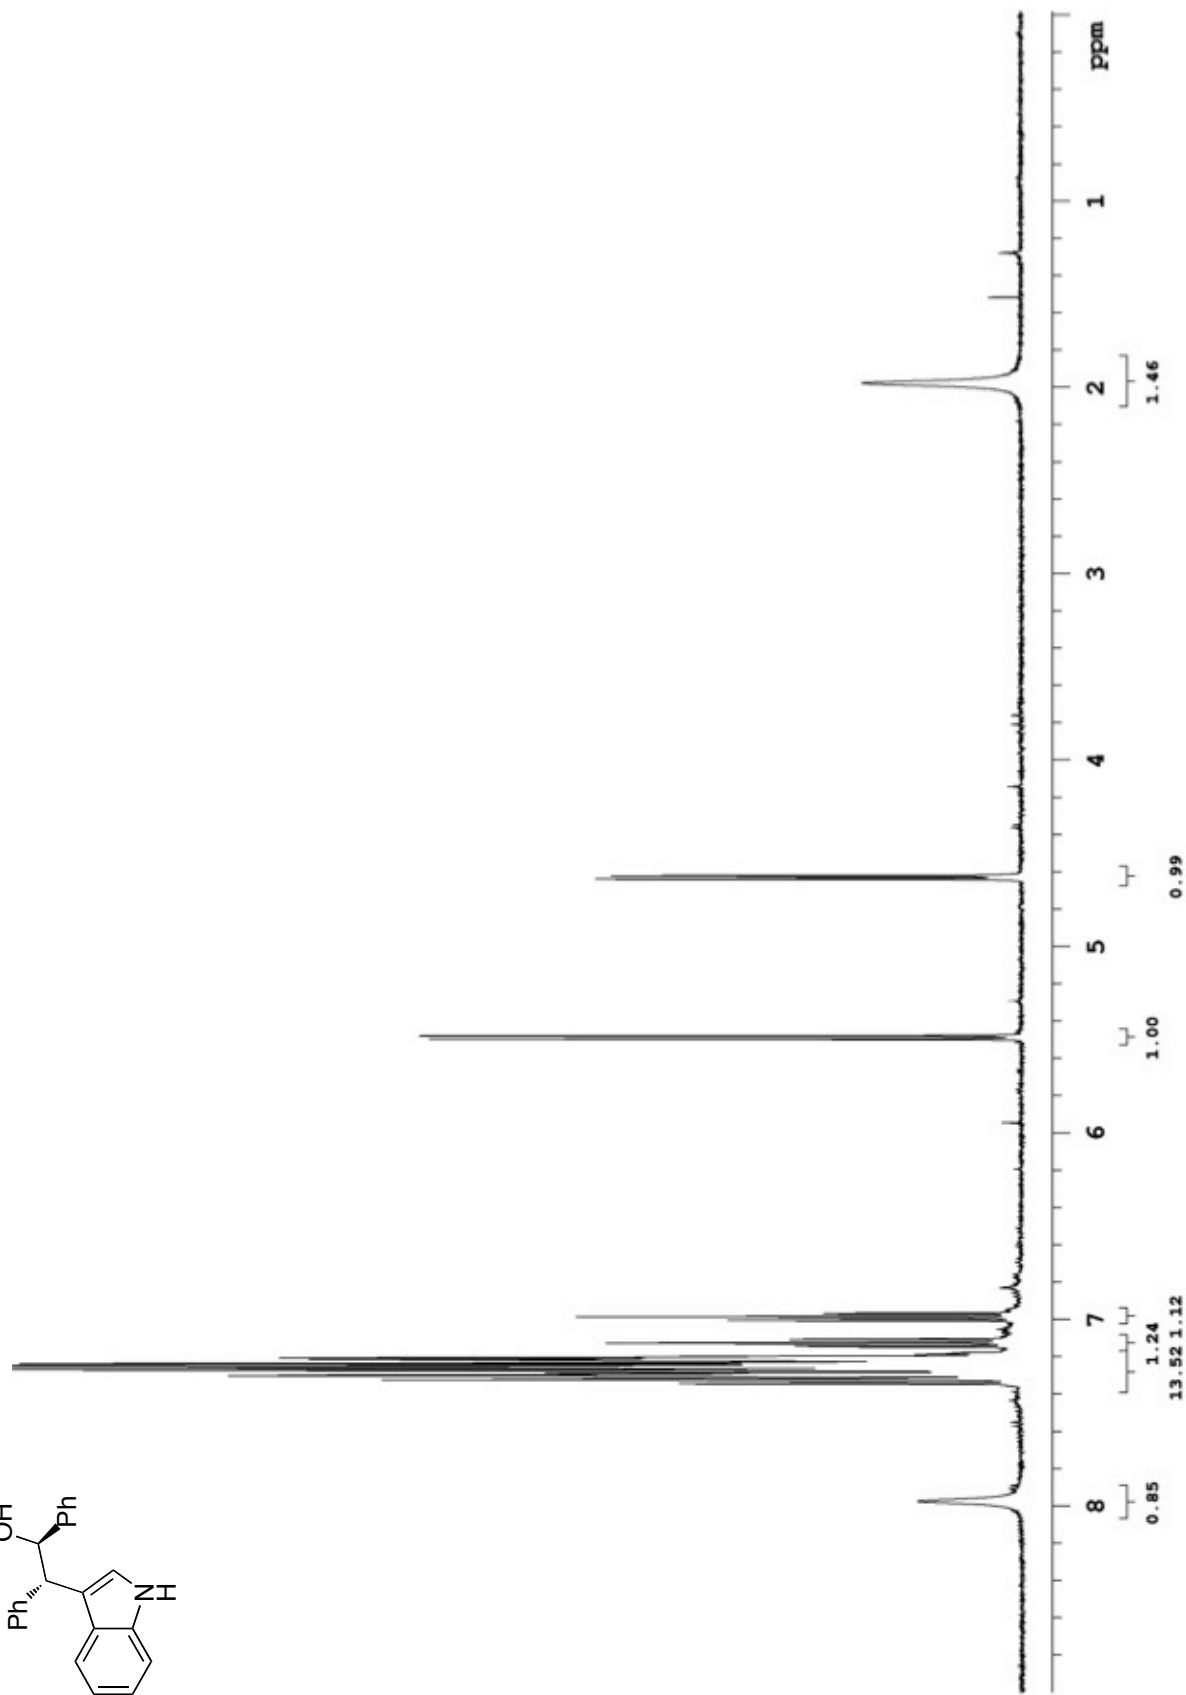



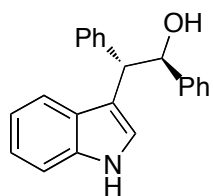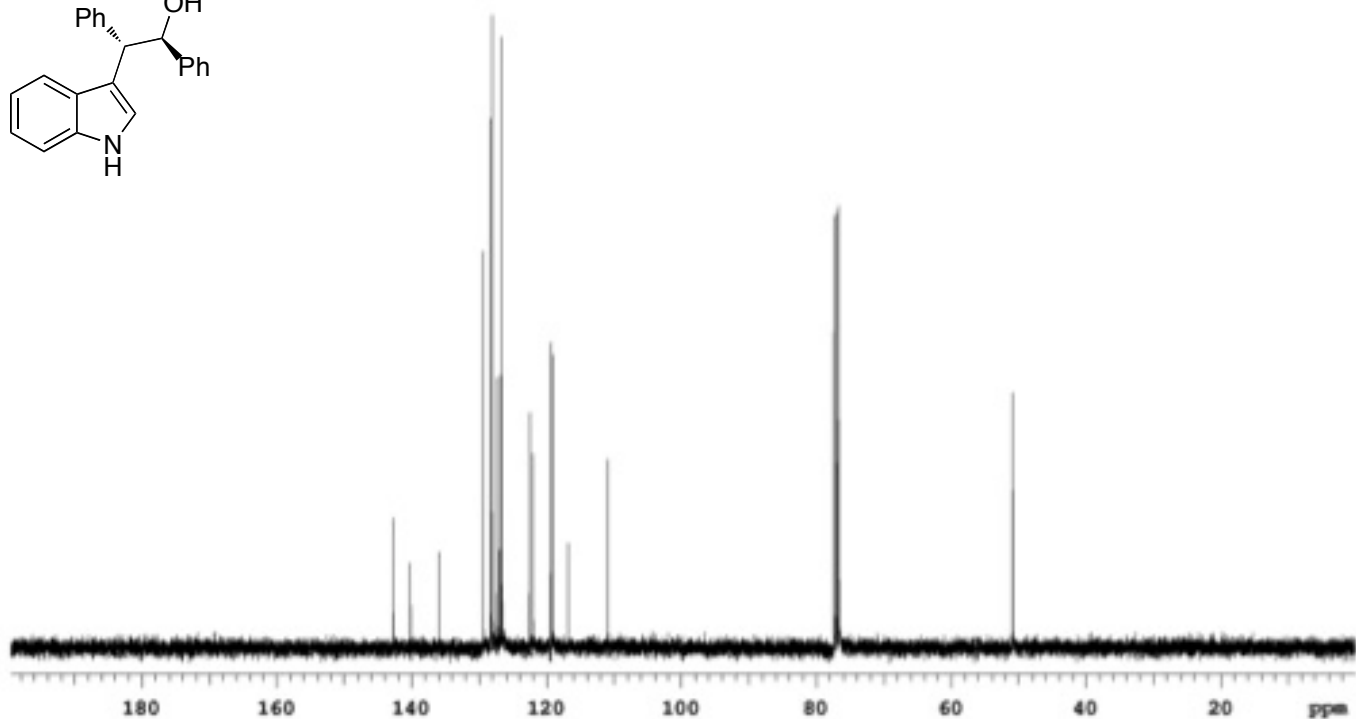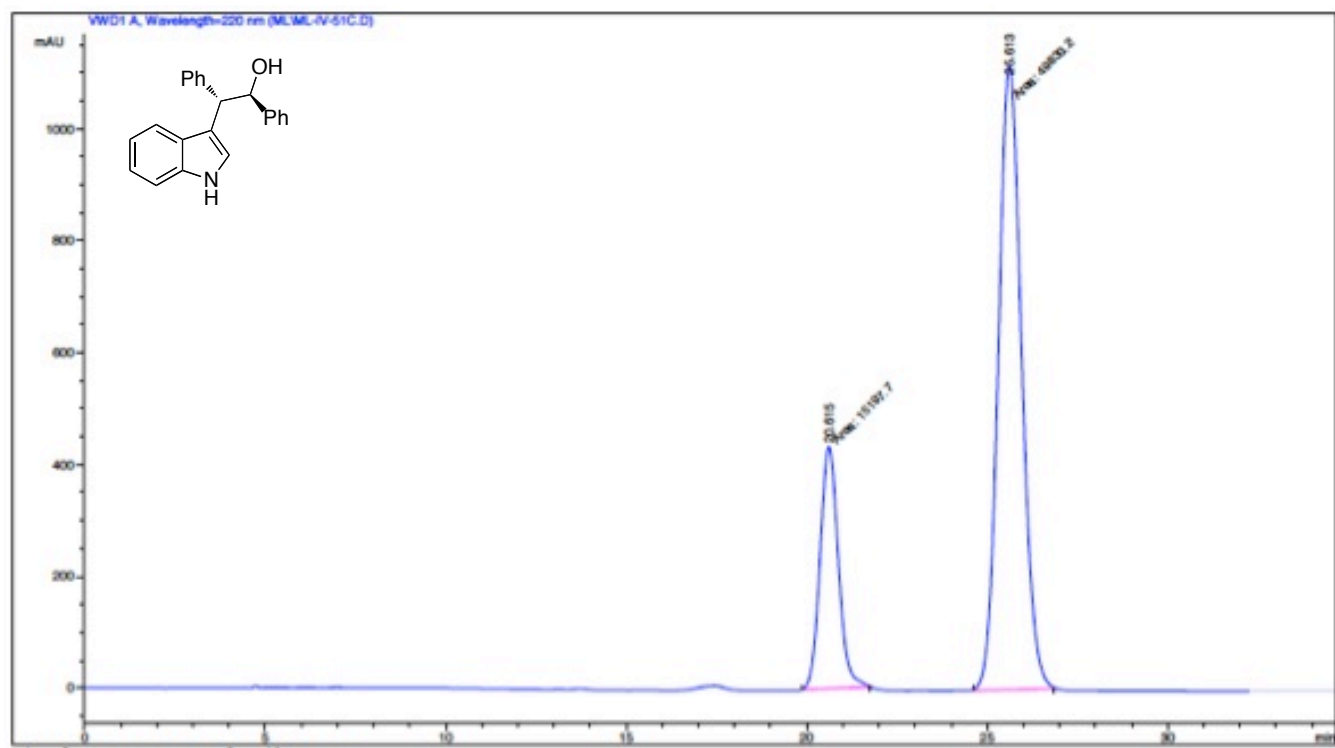

Signal 1: VWD1 A, Wavelength=220 nm

| Peak # | RetTime [min] | Type | Width [min] | Area mAU  | Height [mAU] | Area %  |
|--------|---------------|------|-------------|-----------|--------------|---------|
| 1      | 20.615        | HM   | 0.5857      | 1.51977e4 | 432.42847    | 23.3700 |
| 2      | 25.613        | HM   | 0.7446      | 4.98332e4 | 1115.44226   | 76.6300 |

Totals : 6.50309e4 1547.87073

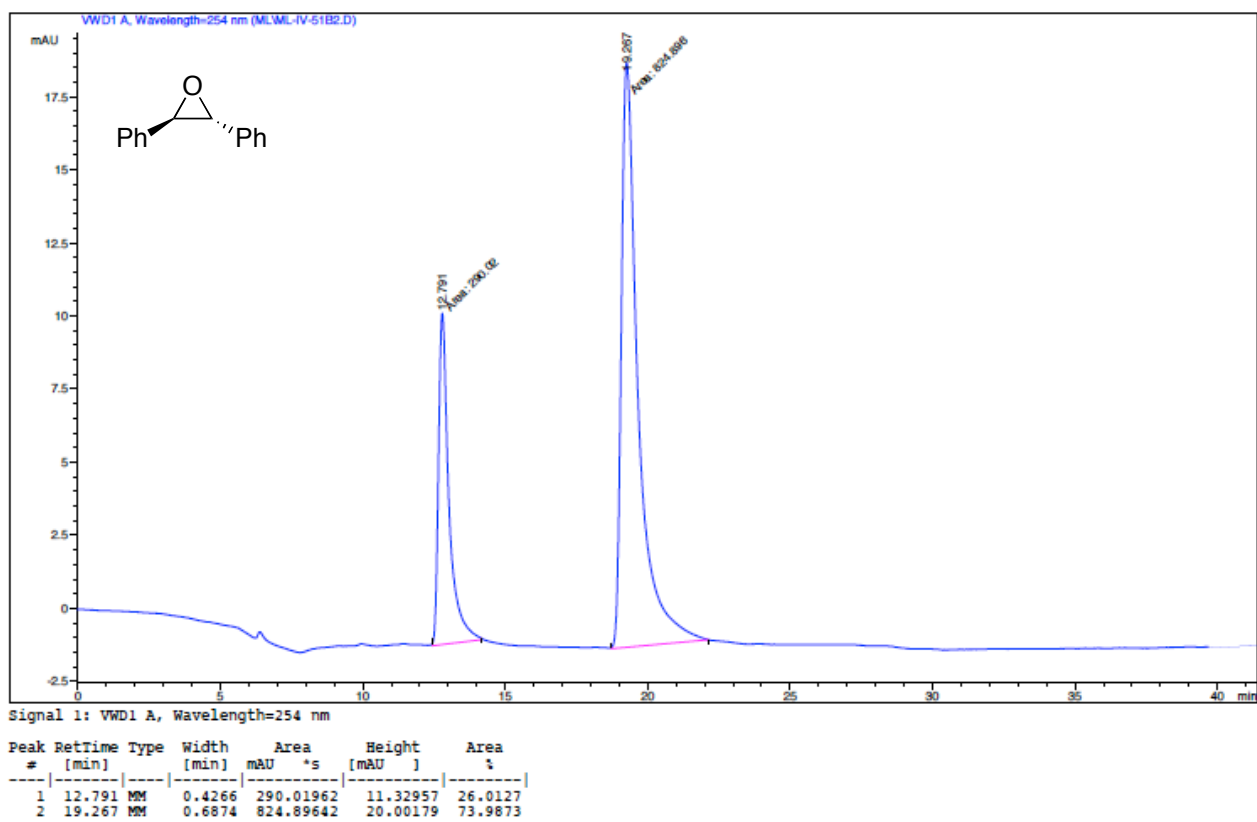

Supplement: c3ob41782d.pdf [file c3ob41782d.pdf]
